# Supplementary material for: Synthesis and biological evaluation of new brassinosteroid analogs with C-22 benzoate function
Source: publisher site journal article supplement (doi:10.3762/bjoc.22.57), 2026-05-18
Supplement: Additional file 1 [file 1860-5397-22-57-S1.pdf]

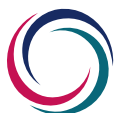

## Supporting Information

for

### Synthesis and biological evaluation of new brassinosteroid analogs with C-22 benzoate function

María Núñez, Camila Escobar, Mario Párraga, Mauricio Soto, Luis Espinoza-Catalán, Katy Díaz and Andrés F. Olea

*Beilstein J. Org. Chem.* **2026**, 22, 753–762. [doi:10.3762/bjoc.22.57](https://doi.org/10.3762/bjoc.22.57)

### NMR spectra of compounds, biological bioassays and protein–ligand interactions (molecular docking)

## Table of contents

|                                                                                                                                                            | pag. |
|------------------------------------------------------------------------------------------------------------------------------------------------------------|------|
| <b>Figure S1.</b> $^1\text{H}$ NMR spectrum of 5 $\alpha$ -cholan-6-oxo-2-ene-23,24-dinor-22-yl 4-methylbenzoate ( <b>23</b> ). .....                      | S8   |
| <b>Figure S2.</b> $^{13}\text{C}$ NMR spectrum of 5 $\alpha$ -cholan-6-oxo-2-ene-23,24-dinor-22-yl 4-methylbenzoate ( <b>23</b> ). .....                   | S8   |
| <b>Figure S3.</b> $^{13}\text{C}$ -DEPT 135 NMR spectrum of 5 $\alpha$ -cholan-6-oxo-2-ene-23,24-dinor-22-yl 4-methylbenzoate ( <b>23</b> ). .....         | S9   |
| <b>Figure S4.</b> $^1\text{H}$ - $^{13}\text{C}$ HSQC-ed. spectrum 5 $\alpha$ -cholan-6-oxo-2-ene-23,24-dinor-22-yl 4-methylbenzoate ( <b>23</b> ). .....  | S9   |
| <b>Figure S5.</b> $^1\text{H}$ - $^{13}\text{C}$ HMBC spectrum of 5 $\alpha$ -cholan-6-oxo-2-ene-23,24-dinor-22-yl 4-methylbenzoate ( <b>23</b> ). .....   | S10  |
| <b>Figure S6.</b> $^1\text{H}$ NMR spectrum of 5 $\alpha$ -cholan-6-oxo-2-ene-23,24-dinor-22-yl 4-methoxybenzoate ( <b>24</b> ). .....                     | S10  |
| <b>Figure S7.</b> $^{13}\text{C}$ NMR spectrum of 5 $\alpha$ -cholan-6-oxo-2-ene-23,24-dinor-22-yl 4-methoxybenzoate ( <b>24</b> ). .....                  | S11  |
| <b>Figure S8.</b> $^{13}\text{C}$ -DEPT 135 NMR spectrum of 5 $\alpha$ -cholan-6-oxo-2-ene-23,24-dinor-22-yl 4-methoxybenzoate ( <b>24</b> ). .....        | S11  |
| <b>Figure S9.</b> $^1\text{H}$ - $^{13}\text{C}$ HSQC-ed. spectrum 5 $\alpha$ -cholan-6-oxo-2-ene-23,24-dinor-22-yl 4-methoxybenzoate ( <b>24</b> ). ..... | S12  |
| <b>Figure S10.</b> $^1\text{H}$ - $^{13}\text{C}$ HMBC spectrum of 5 $\alpha$ -cholan-6-oxo-2-ene-23,24-dinor-22-yl 4-methoxybenzoate ( <b>24</b> ). ..... | S12  |
| <b>Figure S11.</b> $^1\text{H}$ NMR spectrum of 5 $\alpha$ -cholan-6-oxo-2-ene-23,24-dinor-22-yl 4-chlorobenzoate ( <b>25</b> ). .....                     | S13  |

|                    |                                                                                                                                         |     |
|--------------------|-----------------------------------------------------------------------------------------------------------------------------------------|-----|
| <b>Figure S12.</b> | $^{13}\text{C}$ NMR spectrum of 5 $\alpha$ -cholan-6-oxo-2-ene-23,24-dinor-22-yl 4-chlorobenzoate ( <b>25</b> ). .....                  | S13 |
| <b>Figure S13.</b> | $^{13}\text{C}$ -DEPT 135 NMR spectrum of 5 $\alpha$ -cholan-6-oxo-2-ene-23,24-dinor-22-yl 4-chlorobenzoate ( <b>25</b> ). .....        | S14 |
| <b>Figure S14.</b> | $^1\text{H}$ - $^{13}\text{C}$ HSQC-ed. spectrum 5 $\alpha$ -cholan-6-oxo-2-ene-23,24-dinor-22-yl 4-chlorobenzoate ( <b>25</b> ). ..... | S14 |
| <b>Figure S15.</b> | $^1\text{H}$ - $^{13}\text{C}$ HMBC spectrum of 5 $\alpha$ -cholan-6-oxo-2-ene-23,24-dinor-22-yl 4-chlorobenzoate ( <b>25</b> ). .....  | S15 |
| <b>Figure S16.</b> | $^1\text{H}$ NMR spectrum of 5 $\alpha$ -cholan-6-oxo-2-ene-23,24-dinor-22-yl 4-bromobenzoate ( <b>26</b> ). .....                      | S15 |
| <b>Figure S17.</b> | $^{13}\text{C}$ NMR spectrum of 5 $\alpha$ -cholan-6-oxo-2-ene-23,24-dinor-22-yl 4-bromobenzoate ( <b>26</b> ). .....                   | S16 |
| <b>Figure S18.</b> | $^{13}\text{C}$ -DEPT 135 NMR spectrum of 5 $\alpha$ -cholan-6-oxo-2-ene-23,24-dinor-22-yl 4-bromobenzoate ( <b>26</b> ). .....         | S16 |
| <b>Figure S19.</b> | $^1\text{H}$ - $^{13}\text{C}$ HSQC-ed. spectrum 5 $\alpha$ -cholan-6-oxo-2-ene-23,24-dinor-22-yl 4-bromobenzoate ( <b>26</b> ). .....  | S17 |
| <b>Figure S20.</b> | $^1\text{H}$ - $^{13}\text{C}$ HMBC spectrum of 5 $\alpha$ -cholan-6-oxo-2-ene-23,24-dinor-22-yl 4-bromobenzoate ( <b>26</b> ). .....   | S17 |
| <b>Figure S21.</b> | $^1\text{H}$ NMR spectrum of 5 $\alpha$ -cholan-6-oxo-2-ene-23,24-dinor-22-yl 4-iodobenzoate ( <b>27</b> ). .....                       | S18 |
| <b>Figure S22.</b> | $^{13}\text{C}$ NMR spectrum of 5 $\alpha$ -cholan-6-oxo-2-ene-23,24-dinor-22-yl 4-iodobenzoate ( <b>27</b> ). .....                    | S18 |
| <b>Figure S23.</b> | $^{13}\text{C}$ -DEPT 135 NMR spectrum of 5 $\alpha$ -cholan-6-oxo-2-ene-23,24-dinor-22-yl 4-iodobenzoate ( <b>27</b> ). .....          | S19 |

|                    |                                                                                                                                                                     |     |
|--------------------|---------------------------------------------------------------------------------------------------------------------------------------------------------------------|-----|
| <b>Figure S24.</b> | $^1\text{H}$ - $^{13}\text{C}$ HSQC-ed. spectrum 5 $\alpha$ -cholan-6-oxo-2-ene-23,24-dinor-22-yl 4-iodobenzoate ( <b>27</b> ). .....                               | S19 |
| <b>Figure S25.</b> | $^1\text{H}$ - $^{13}\text{C}$ HMBC spectrum of 5 $\alpha$ -cholan-6-oxo-2-ene-23,24-dinor-22-yl 4-iodobenzoate ( <b>27</b> ). .....                                | S20 |
| <b>Figure S26.</b> | $^1\text{H}$ NMR spectrum of 5 $\alpha$ -cholan-6-oxo-2-ene-23,24-dinor-22-yl 4-cyanobenzoate ( <b>28</b> ). .....                                                  | S20 |
| <b>Figure S27.</b> | $^{13}\text{C}$ NMR spectrum of 5 $\alpha$ -cholan-6-oxo-2-ene-23,24-dinor-22-yl 4-cyanobenzoate ( <b>28</b> ). .....                                               | S21 |
| <b>Figure S28.</b> | $^{13}\text{C}$ -DEPT 135 NMR spectrum of 5 $\alpha$ -cholan-6-oxo-2-ene-23,24-dinor-22-yl 4-cyanobenzoate ( <b>28</b> ). .....                                     | S21 |
| <b>Figure S29.</b> | $^1\text{H}$ - $^{13}\text{C}$ HSQC-ed. spectrum 5 $\alpha$ -cholan-6-oxo-2-ene-23,24-dinor-22-yl 4-cyanobenzoate ( <b>28</b> ). .....                              | S22 |
| <b>Figure S30.</b> | $^1\text{H}$ - $^{13}\text{C}$ HMBC spectrum of 5 $\alpha$ -cholan-6-oxo-2-ene-23,24-dinor-22-yl 4-cyanobenzoate ( <b>28</b> ). .....                               | S22 |
| <b>Figure S31.</b> | HRMS spectrum of 2 $\alpha$ ,3 $\alpha$ -dihydroxy-5 $\alpha$ -cholan-6-oxo-23,24-dinor-22-yl 4-methylbenzoate ( <b>17</b> ). .....                                 | S23 |
| <b>Figure S32.</b> | $^1\text{H}$ NMR spectrum of 2 $\alpha$ ,3 $\alpha$ -dihydroxy-5 $\alpha$ -cholan-6-oxo-23,24-dinor-22-yl 4-methylbenzoate ( <b>17</b> ). .....                     | S23 |
| <b>Figure S33.</b> | $^{13}\text{C}$ NMR spectrum of 2 $\alpha$ ,3 $\alpha$ -dihydroxy-5 $\alpha$ -cholan-6-oxo-23,24-dinor-22-yl 4-methylbenzoate ( <b>17</b> ). .....                  | S24 |
| <b>Figure S34.</b> | $^{13}\text{C}$ -DEPT 135 NMR spectrum of 2 $\alpha$ ,3 $\alpha$ -dihydroxy-5 $\alpha$ -cholan-6-oxo-23,24-dinor-22-yl 4-methylbenzoate ( <b>17</b> ). .....        | S24 |
| <b>Figure S35.</b> | $^1\text{H}$ - $^{13}\text{C}$ HSQC-ed. spectrum 2 $\alpha$ ,3 $\alpha$ -dihydroxy-5 $\alpha$ -cholan-6-oxo-23,24-dinor-22-yl 4-methylbenzoate ( <b>17</b> ). ..... | S25 |

|                    |                                                                                                                                                                      |     |
|--------------------|----------------------------------------------------------------------------------------------------------------------------------------------------------------------|-----|
| <b>Figure S36.</b> | $^1\text{H}$ - $^{13}\text{C}$ HMBC spectrum of 2 $\alpha$ ,3 $\alpha$ -dihydroxy-5 $\alpha$ -cholan-6-oxo-23,24-dinor-22-yl 4-methylbenzoate ( <b>17</b> ). .....   | S25 |
| <b>Figure S37.</b> | HRMS spectrum of 2 $\alpha$ ,3 $\alpha$ -dihydroxy-5 $\alpha$ -cholan-6-oxo-23,24-dinor-22-yl 4-methoxybenzoate ( <b>18</b> ). .....                                 | S26 |
| <b>Figure S38.</b> | $^1\text{H}$ NMR spectrum of 2 $\alpha$ ,3 $\alpha$ -dihydroxy-5 $\alpha$ -cholan-6-oxo-23,24-dinor-22-yl 4-methoxybenzoate ( <b>18</b> ). .....                     | S26 |
| <b>Figure S39.</b> | $^{13}\text{C}$ NMR spectrum of 2 $\alpha$ ,3 $\alpha$ -dihydroxy-5 $\alpha$ -cholan-6-oxo-23,24-dinor-22-yl 4-methoxybenzoate ( <b>18</b> ). .....                  | S27 |
| <b>Figure S40.</b> | $^{13}\text{C}$ -DEPT 135 NMR spectrum of 2 $\alpha$ ,3 $\alpha$ -dihydroxy-5 $\alpha$ -cholan-6-oxo-23,24-dinor-22-yl 4-methoxybenzoate ( <b>18</b> ). .....        | S27 |
| <b>Figure S41.</b> | $^1\text{H}$ - $^{13}\text{C}$ HSQC-ed. spectrum 2 $\alpha$ ,3 $\alpha$ -dihydroxy-5 $\alpha$ -cholan-6-oxo-23,24-dinor-22-yl 4-methoxybenzoate ( <b>18</b> ). ..... | S28 |
| <b>Figure S42.</b> | $^1\text{H}$ - $^{13}\text{C}$ HMBC spectrum of 2 $\alpha$ ,3 $\alpha$ -dihydroxy-5 $\alpha$ -cholan-6-oxo-23,24-dinor-22-yl 4-methoxybenzoate ( <b>18</b> ). .....  | S28 |
| <b>Figure S43.</b> | HRMS spectrum of 2 $\alpha$ ,3 $\alpha$ -dihydroxy-5 $\alpha$ -cholan-6-oxo-23,24-dinor-22-yl 4-chlorobenzoate ( <b>19</b> ). .....                                  | S29 |
| <b>Figure S44.</b> | $^1\text{H}$ NMR spectrum of 2 $\alpha$ ,3 $\alpha$ -dihydroxy-5 $\alpha$ -cholan-6-oxo-23,24-dinor-22-yl 4-chlorobenzoate ( <b>19</b> ). .....                      | S29 |
| <b>Figure S45.</b> | $^{13}\text{C}$ NMR spectrum of 2 $\alpha$ ,3 $\alpha$ -dihydroxy-5 $\alpha$ -cholan-6-oxo-23,24-dinor-22-yl 4-chlorobenzoate ( <b>19</b> ). .....                   | S30 |
| <b>Figure S46.</b> | $^{13}\text{C}$ -DEPT 135 NMR spectrum of 2 $\alpha$ ,3 $\alpha$ -dihydroxy-5 $\alpha$ -cholan-6-oxo-23,24-dinor-22-yl 4-chlorobenzoate ( <b>19</b> ). .....         | S30 |
| <b>Figure S47.</b> | $^1\text{H}$ - $^{13}\text{C}$ HSQC-ed. spectrum 2 $\alpha$ ,3 $\alpha$ -dihydroxy-5 $\alpha$ -cholan-6-oxo-23,24-dinor-22-yl 4-chlorobenzoate ( <b>19</b> ). .....  | S31 |

|                    |                                                                                                                                                                    |     |
|--------------------|--------------------------------------------------------------------------------------------------------------------------------------------------------------------|-----|
| <b>Figure S48.</b> | $^1\text{H}$ - $^{13}\text{C}$ HMBC spectrum of 2 $\alpha$ ,3 $\alpha$ -dihydroxy-5 $\alpha$ -cholan-6-oxo-23,24-dinor-22-yl 4-chlorobenzoate ( <b>19</b> ). ..... | S31 |
| <b>Figure S49.</b> | HRMS spectrum of 2 $\alpha$ ,3 $\alpha$ -dihydroxy-5 $\alpha$ -cholan-6-oxo-23,24-dinor-22-yl 4-bromobenzoate ( <b>20</b> ). .....                                 | S32 |
| <b>Figure S50.</b> | $^1\text{H}$ NMR spectrum of 2 $\alpha$ ,3 $\alpha$ -dihydroxy-5 $\alpha$ -cholan-6-oxo-23,24-dinor-22-yl 4-bromobenzoate ( <b>20</b> ). .....                     | S32 |
| <b>Figure S51.</b> | $^{13}\text{C}$ NMR spectrum of 2 $\alpha$ ,3 $\alpha$ -dihydroxy-5 $\alpha$ -cholan-6-oxo-23,24-dinor-22-yl 4-bromobenzoate ( <b>20</b> ). .....                  | S33 |
| <b>Figure S52.</b> | $^{13}\text{C}$ -DEPT 135 NMR spectrum of 2 $\alpha$ ,3 $\alpha$ -dihydroxy-5 $\alpha$ -cholan-6-oxo-23,24-dinor-22-yl 4-bromobenzoate ( <b>20</b> ). .....        | S33 |
| <b>Figure S53.</b> | $^1\text{H}$ - $^{13}\text{C}$ HSQC-ed. spectrum 2 $\alpha$ ,3 $\alpha$ -dihydroxy-5 $\alpha$ -cholan-6-oxo-23,24-dinor-22-yl 4-bromobenzoate ( <b>20</b> ). ..... | S34 |
| <b>Figure S54.</b> | $^1\text{H}$ - $^{13}\text{C}$ HMBC spectrum of 2 $\alpha$ ,3 $\alpha$ -dihydroxy-5 $\alpha$ -cholan-6-oxo-23,24-dinor-22-yl 4-bromobenzoate ( <b>20</b> ). .....  | S34 |
| <b>Figure S55.</b> | HRMS spectrum of 2 $\alpha$ ,3 $\alpha$ -dihydroxy-5 $\alpha$ -cholan-6-oxo-23,24-dinor-22-yl 4-iodobenzoate ( <b>21</b> ). .....                                  | S35 |
| <b>Figure S56.</b> | $^1\text{H}$ NMR spectrum of 2 $\alpha$ ,3 $\alpha$ -dihydroxy-5 $\alpha$ -cholan-6-oxo-23,24-dinor-22-yl 4-iodobenzoate ( <b>21</b> ). .....                      | S35 |
| <b>Figure S57.</b> | $^{13}\text{C}$ NMR spectrum of 2 $\alpha$ ,3 $\alpha$ -dihydroxy-5 $\alpha$ -cholan-6-oxo-23,24-dinor-22-yl 4-iodobenzoate ( <b>21</b> ). .....                   | S36 |
| <b>Figure S58.</b> | $^{13}\text{C}$ -DEPT 135 NMR spectrum of 2 $\alpha$ ,3 $\alpha$ -dihydroxy-5 $\alpha$ -cholan-6-oxo-23,24-dinor-22-yl 4-iodobenzoate ( <b>21</b> ). .....         | S36 |
| <b>Figure S59.</b> | $^1\text{H}$ - $^{13}\text{C}$ HSQC-ed. spectrum 2 $\alpha$ ,3 $\alpha$ -dihydroxy-5 $\alpha$ -cholan-6-oxo-23,24-dinor-22-yl 4-iodobenzoate ( <b>21</b> ). .....  | S37 |

|                    |                                                                                                                                                                                                                                                                                                                                                                                                                                                                  |     |
|--------------------|------------------------------------------------------------------------------------------------------------------------------------------------------------------------------------------------------------------------------------------------------------------------------------------------------------------------------------------------------------------------------------------------------------------------------------------------------------------|-----|
| <b>Figure S60.</b> | $^1\text{H}$ - $^{13}\text{C}$ HMBC spectrum of 2 $\alpha$ ,3 $\alpha$ -dihydroxy-5 $\alpha$ -cholan-6-oxo-23,24-dinor-22-yl 4-iodobenzoate ( <b>21</b> ). .....                                                                                                                                                                                                                                                                                                 | S37 |
| <b>Figure S61.</b> | HRMS spectrum of 2 $\alpha$ ,3 $\alpha$ -dihydroxy-5 $\alpha$ -cholan-6-oxo-23,24-dinor-22-yl 4-cyanobenzoate ( <b>22</b> ). .....                                                                                                                                                                                                                                                                                                                               | S38 |
| <b>Figure S62.</b> | $^1\text{H}$ NMR spectrum of 2 $\alpha$ ,3 $\alpha$ -dihydroxy-5 $\alpha$ -cholan-6-oxo-23,24-dinor-22-yl 4-cyanobenzoate ( <b>22</b> ). .....                                                                                                                                                                                                                                                                                                                   | S38 |
| <b>Figure S63.</b> | $^{13}\text{C}$ NMR spectrum of 2 $\alpha$ ,3 $\alpha$ -dihydroxy-5 $\alpha$ -cholan-6-oxo-23,24-dinor-22-yl 4-cyanobenzoate ( <b>22</b> ). .....                                                                                                                                                                                                                                                                                                                | S39 |
| <b>Figure S64.</b> | $^{13}\text{C}$ -DEPT 135 NMR spectrum of 2 $\alpha$ ,3 $\alpha$ -dihydroxy-5 $\alpha$ -cholan-6-oxo-23,24-dinor-22-yl 4-cyanobenzoate ( <b>22</b> ). .....                                                                                                                                                                                                                                                                                                      | S39 |
| <b>Figure S65.</b> | $^1\text{H}$ - $^{13}\text{C}$ HSQC-ed. spectrum 2 $\alpha$ ,3 $\alpha$ -dihydroxy-5 $\alpha$ -cholan-6-oxo-23,24-dinor-22-yl 4-cyanobenzoate ( <b>22</b> ). .....                                                                                                                                                                                                                                                                                               | S40 |
| <b>Figure S66.</b> | $^1\text{H}$ - $^{13}\text{C}$ HMBC spectrum of 2 $\alpha$ ,3 $\alpha$ -dihydroxy-5 $\alpha$ -cholan-6-oxo-23,24-dinor-22-yl 4-cyanobenzoate ( <b>22</b> ). .....                                                                                                                                                                                                                                                                                                | S40 |
| <b>Figure S67.</b> | Analysis de Immunoblot showing dephosphorylation of BES1 after treatment with active compound <b>12</b> and <b>19</b> . WB: Western Blot; dBES1: dominant Brassinosteroid-Insensitive 1 Suppressor 1; DMSO: Dimethyl sulfoxide; kDa: Kilodalton. Representative images are shown. dBES1, dephosphorylated BES1.....                                                                                                                                              | S41 |
| <b>Figure S68</b>  | BES1 phosphorylation status tested by immunoblot with $\alpha$ -BES1 antibody in roots of <i>Arabidopsis thaliana</i> ecotype Col-0 6-day-old seedlings after analogues of BR treatment. Tubulin detected with $\alpha$ -tubulin antibody was used as a loading control. The graph shows the percentage of dephosphorylated BES1 relative to total BES1 detected in wild-type <i>Arabidopsis</i> ecotype (Col-0) treated with brassinolide (1) after 6 days..... | S41 |

|                    |                                                                                                                                                                                                                                                                                                                                                                                                                                                                                                                                                                                 |     |
|--------------------|---------------------------------------------------------------------------------------------------------------------------------------------------------------------------------------------------------------------------------------------------------------------------------------------------------------------------------------------------------------------------------------------------------------------------------------------------------------------------------------------------------------------------------------------------------------------------------|-----|
| <b>Figure S69.</b> | Protein–ligand interactions with a) compound <b>12</b> b) compound <b>14</b> ; c) compound <b>16a</b> , d) compound <b>17</b> , e) compound <b>18</b> , f) compound <b>19</b> , g) compound <b>20</b> , h) compound <b>21</b> and i) compound <b>22</b> . Hydrogen bonds are represented in green segmented lines. $\pi$ – $\pi$ stacking are represented in dark pink segmented lines. Hydrophobic interactions are represented in pink segmented lines. Visualization of the docked poses was performed using Discovery Studio Visualizer (BIOVIA, San Diego, CA, USA). ..... | S46 |
| <b>Table S1.</b>   | Rice lamina assays using the second leaf lamina joints (angle opening, degrees) of excised leaf segments treated with BRs analogs ( <b>1</b> , <b>12</b> , <b>14</b> and <b>17–22</b> ) at different concentrations. Brassinolide was used as positive control at the same concentrations. ....                                                                                                                                                                                                                                                                                 | S47 |
| <b>Table S2.</b>   | Docked compounds–heterodimer protein contacts of synthetic analogs ( <b>12–22</b> ). ....                                                                                                                                                                                                                                                                                                                                                                                                                                                                                       | S48 |

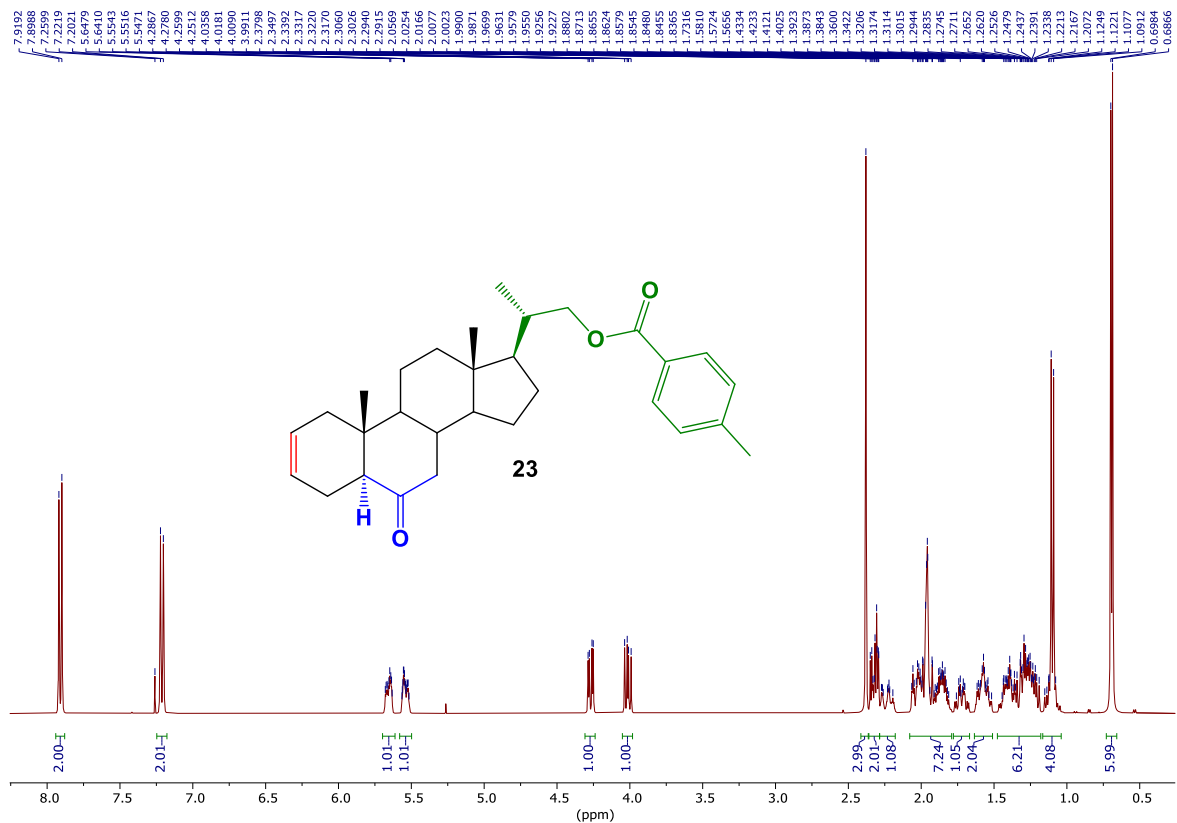

**Figure S1.**  $^1\text{H}$  NMR spectrum of 5 $\alpha$ -cholan-6-oxo-2-ene-23,24-dinor-22-yl 4-methylbenzoate (**23**).

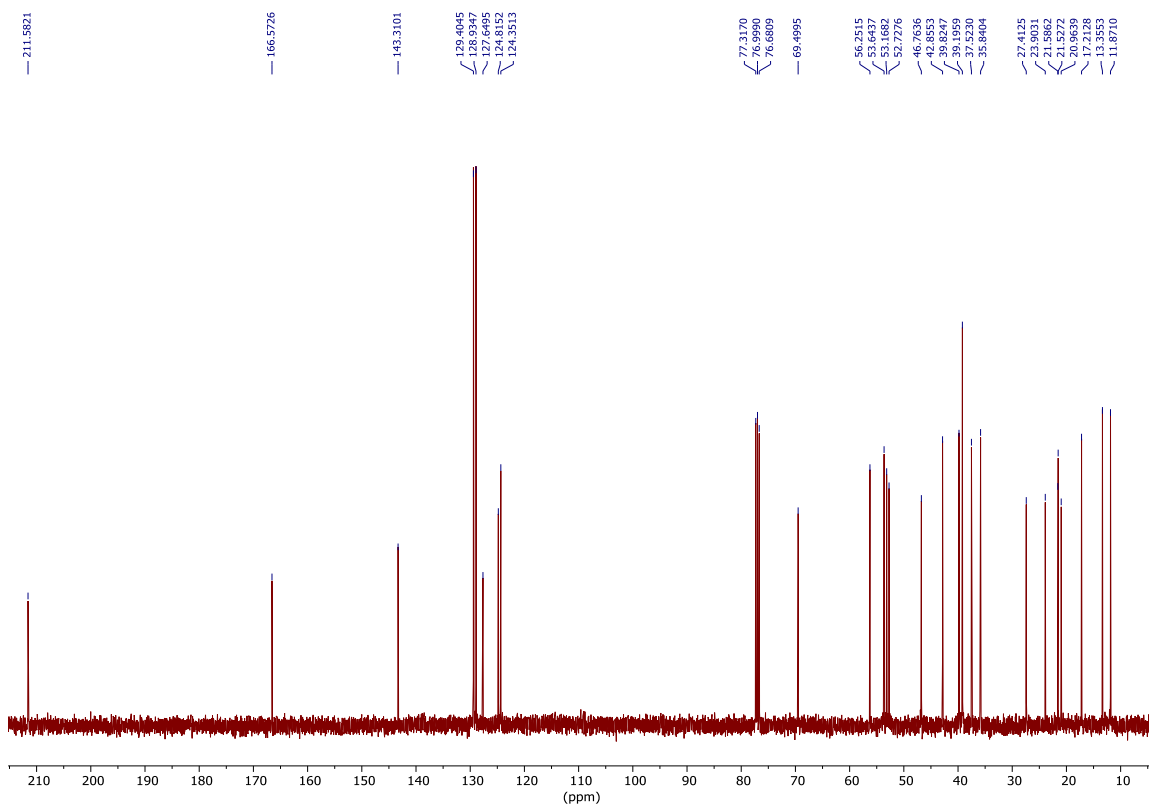

**Figure S2.**  $^{13}\text{C}$  NMR spectrum of 5 $\alpha$ -cholan-6-oxo-2-ene-23,24-dinor-22-yl 4-methylbenzoate (**23**).

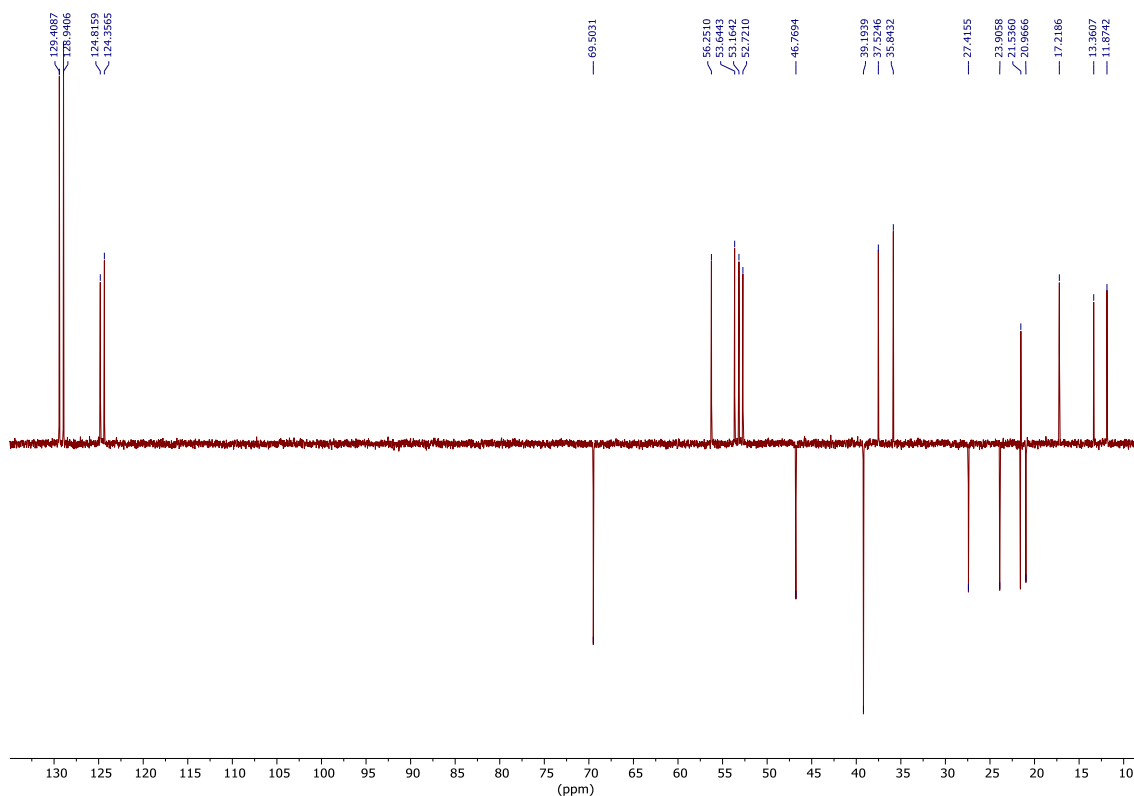

**Figure S3.**  $^{13}\text{C}$ -DEPT 135 NMR spectrum of  $5\alpha$ -cholan-6-oxo-2-ene-23,24-dinor-22-yl 4-methylbenzoate (**23**).

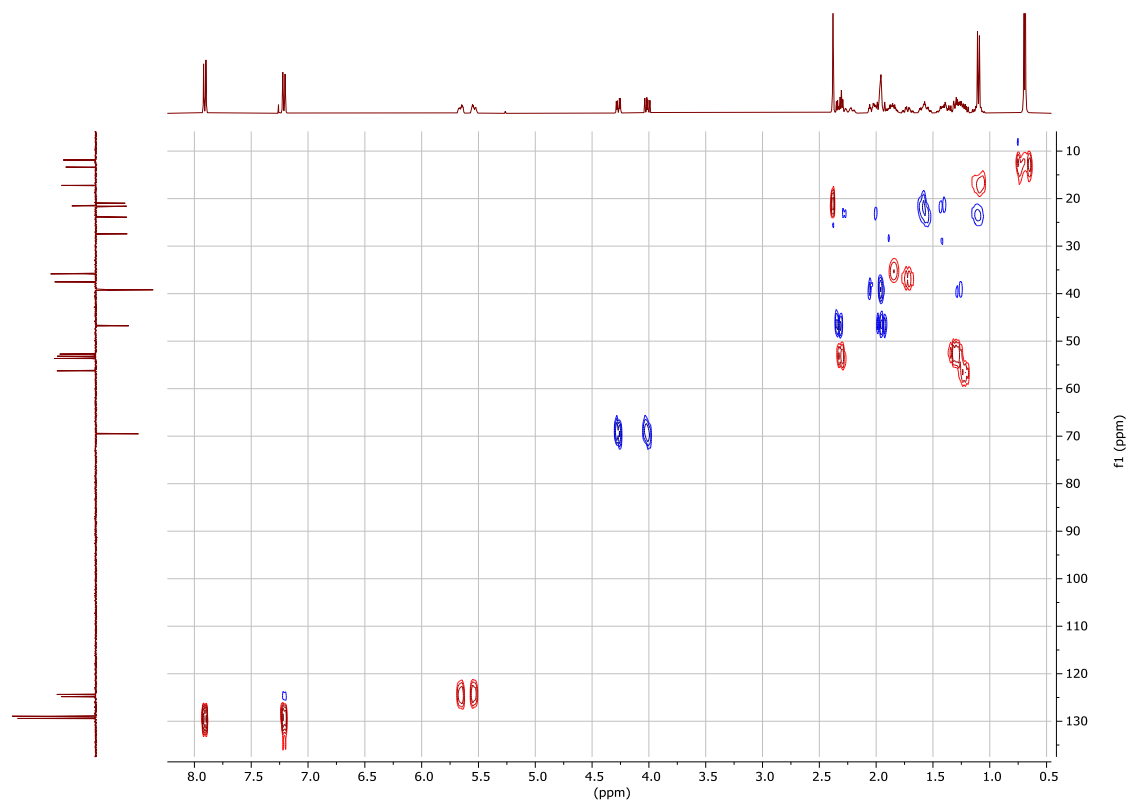

**Figure S4.**  $^1\text{H}$ - $^{13}\text{C}$  HSQC-ed. spectrum  $5\alpha$ -cholan-6-oxo-2-ene-23,24-dinor-22-yl 4-methylbenzoate (**23**).

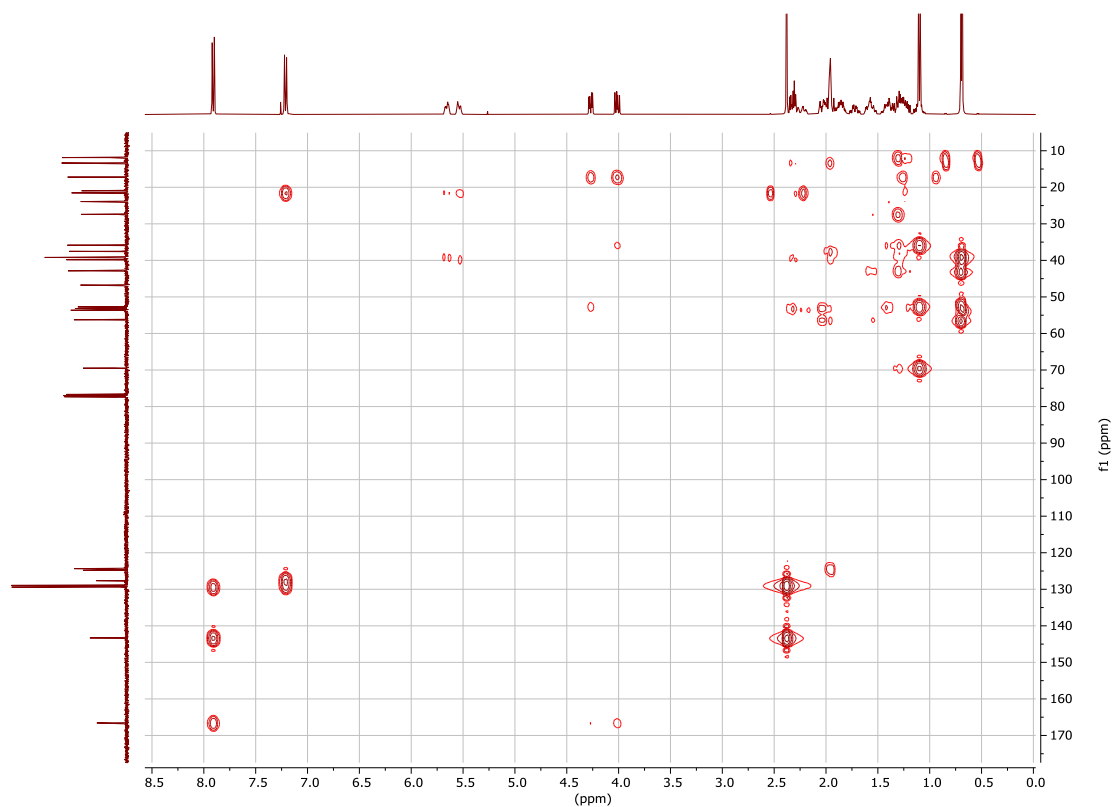

**Figure S5.**  $^1\text{H}$ - $^{13}\text{C}$  HMBC spectrum of 5 $\alpha$ -cholan-6-oxo-2-ene-23,24-dinor-22-yl 4-methylbenzoate (**23**).

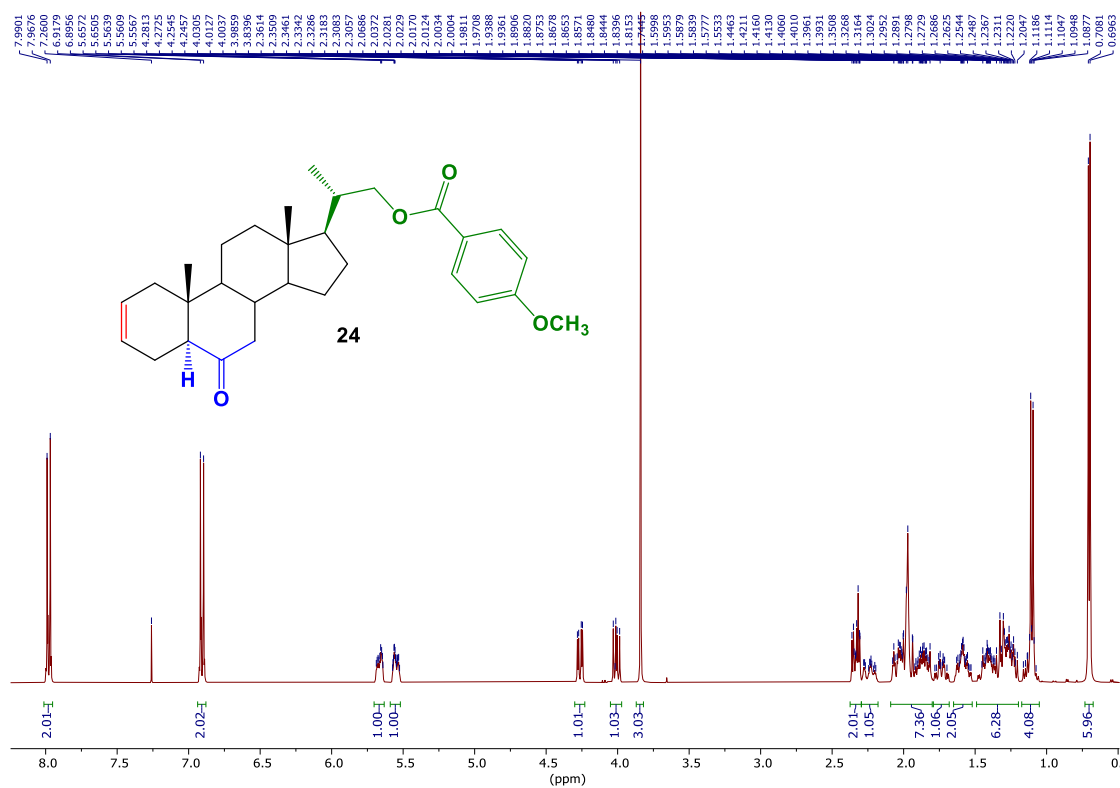

**Figure S6.**  $^1\text{H}$  NMR spectrum of 5 $\alpha$ -cholan-6-oxo-2-ene-23,24-dinor-22-yl 4-methoxybenzoate (**24**).

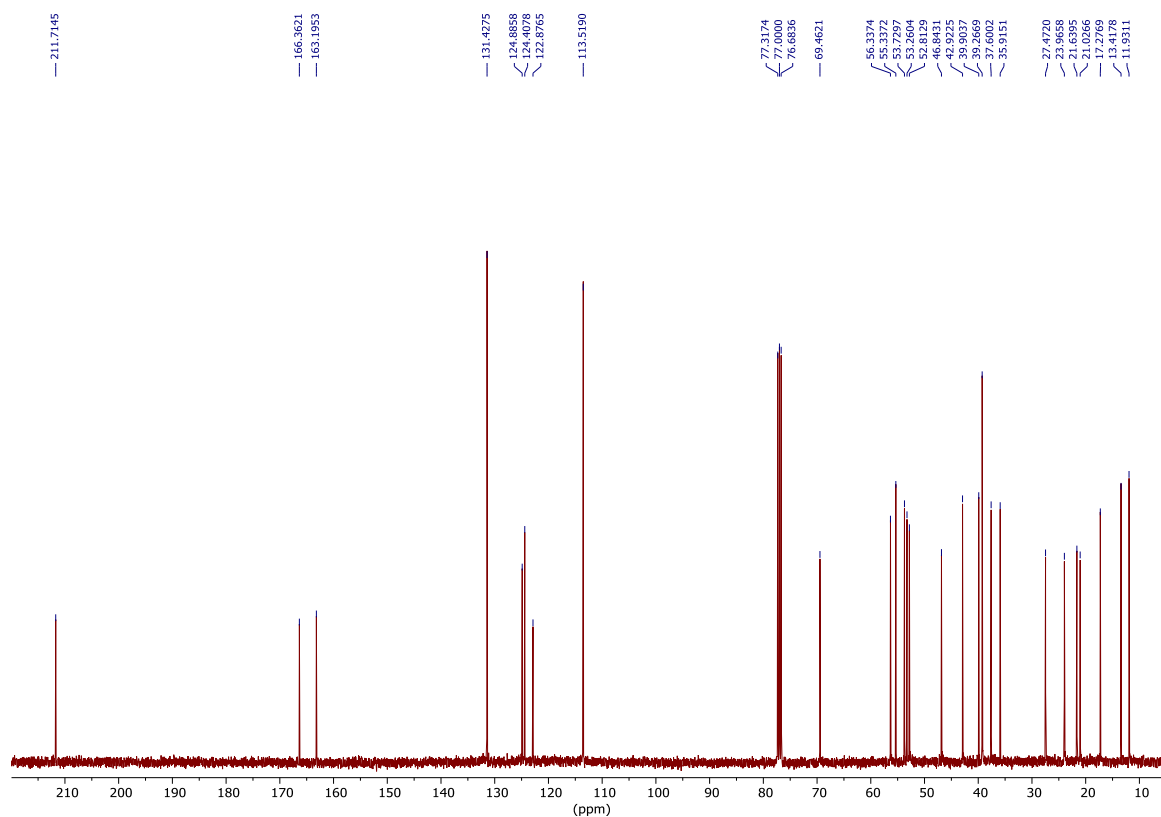

**Figure S7.**  $^{13}\text{C}$  NMR spectrum of 5 $\alpha$ -cholan-6-oxo-2-ene-23,24-dinor-22-yl 4-methoxybenzoate (**24**).

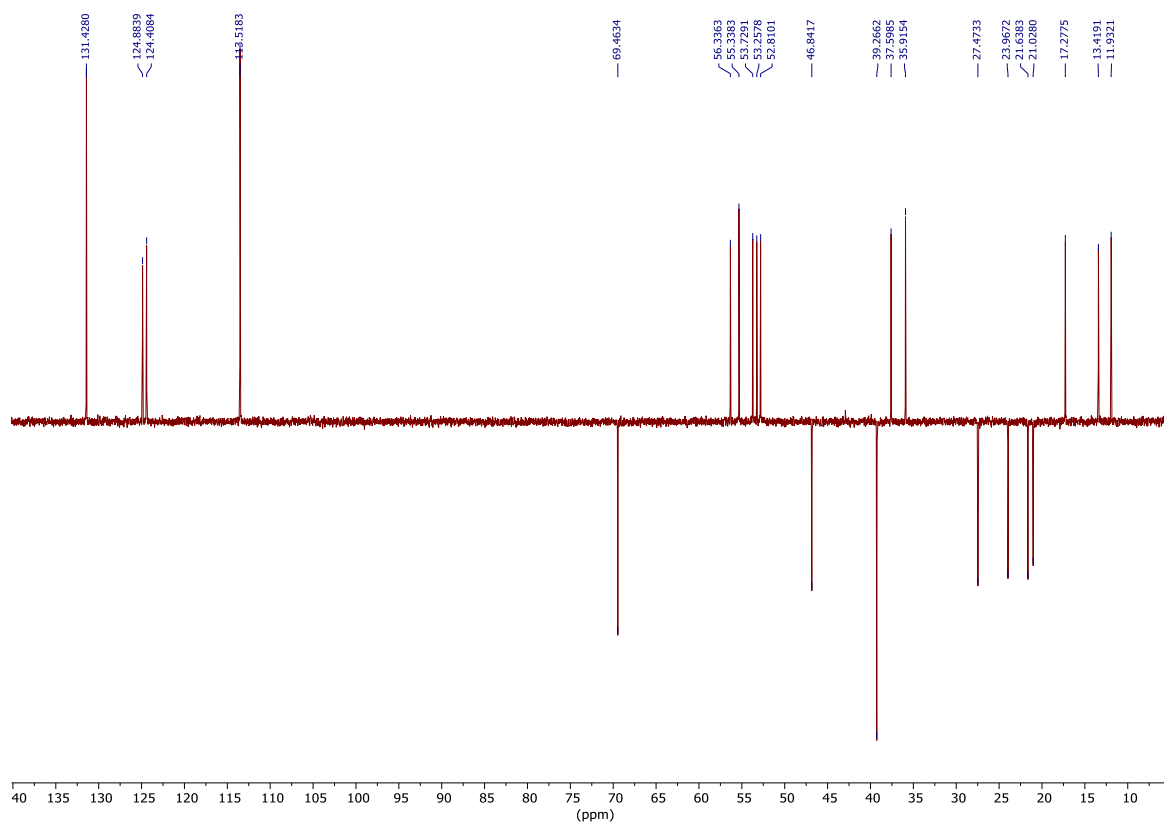

**Figure S8.**  $^{13}\text{C}$ -DEPT 135 NMR spectrum of 5 $\alpha$ -cholan-6-oxo-2-ene-23,24-dinor-22-yl 4-methoxybenzoate (**24**).

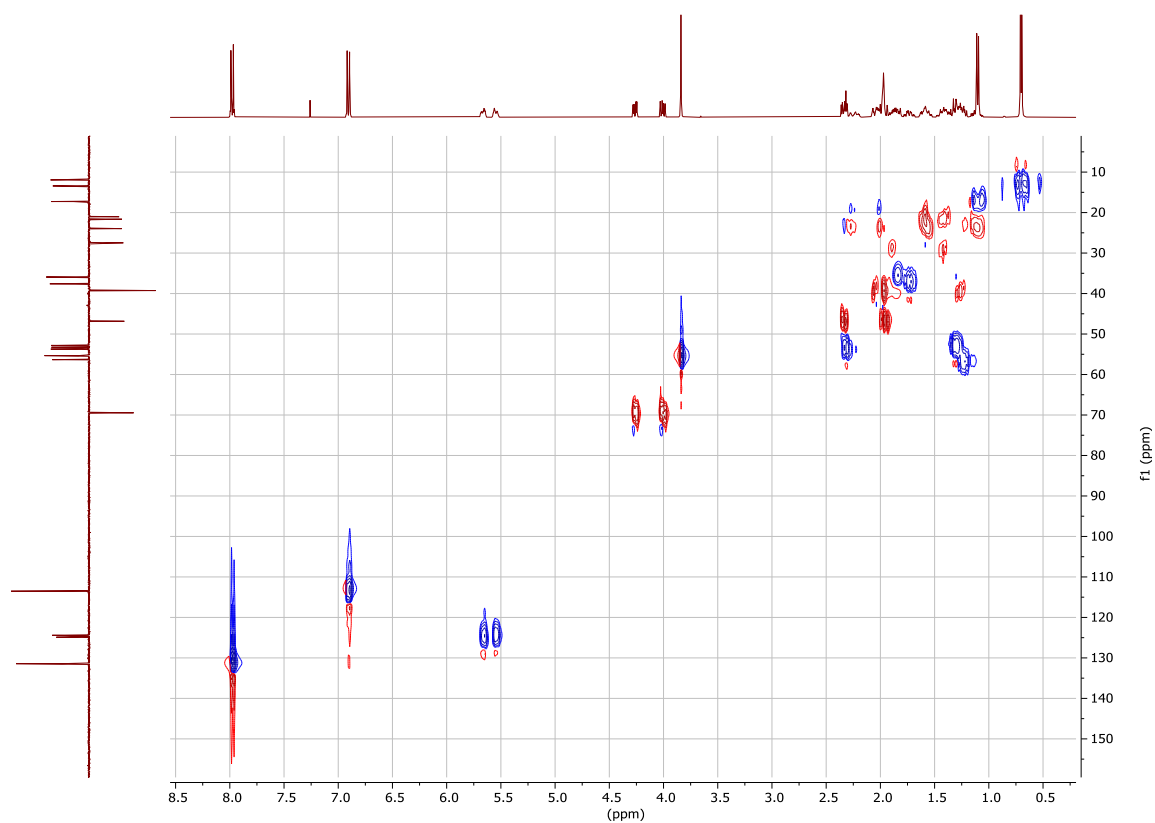

**Figure S9.**  $^1\text{H}$ - $^{13}\text{C}$  HSQC-ed. spectrum  $5\alpha$ -cholan-6-oxo-2-ene-23,24-dinor-22-yl 4-methoxybenzoate (**24**).

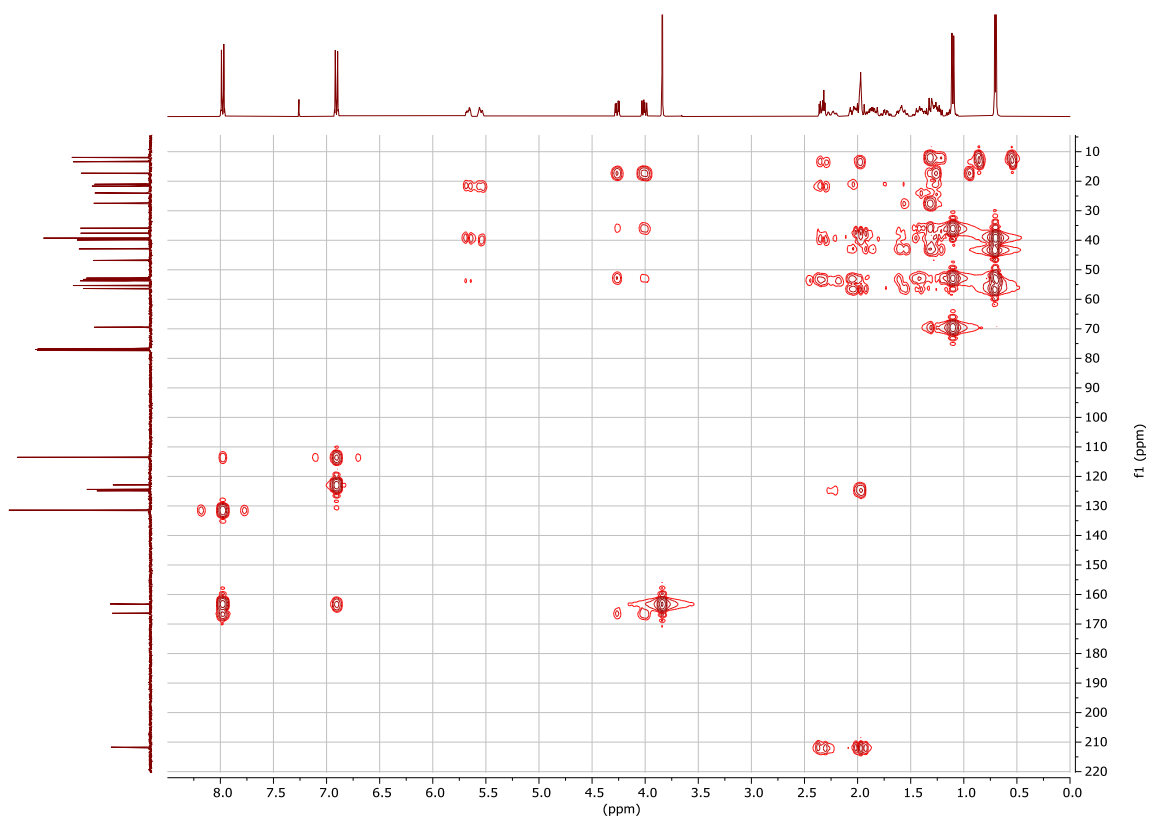

**Figure S10.**  $^1\text{H}$ - $^{13}\text{C}$  HMBC spectrum of  $5\alpha$ -cholan-6-oxo-2-ene-23,24-dinor-22-yl 4-methoxybenzoate (**24**).

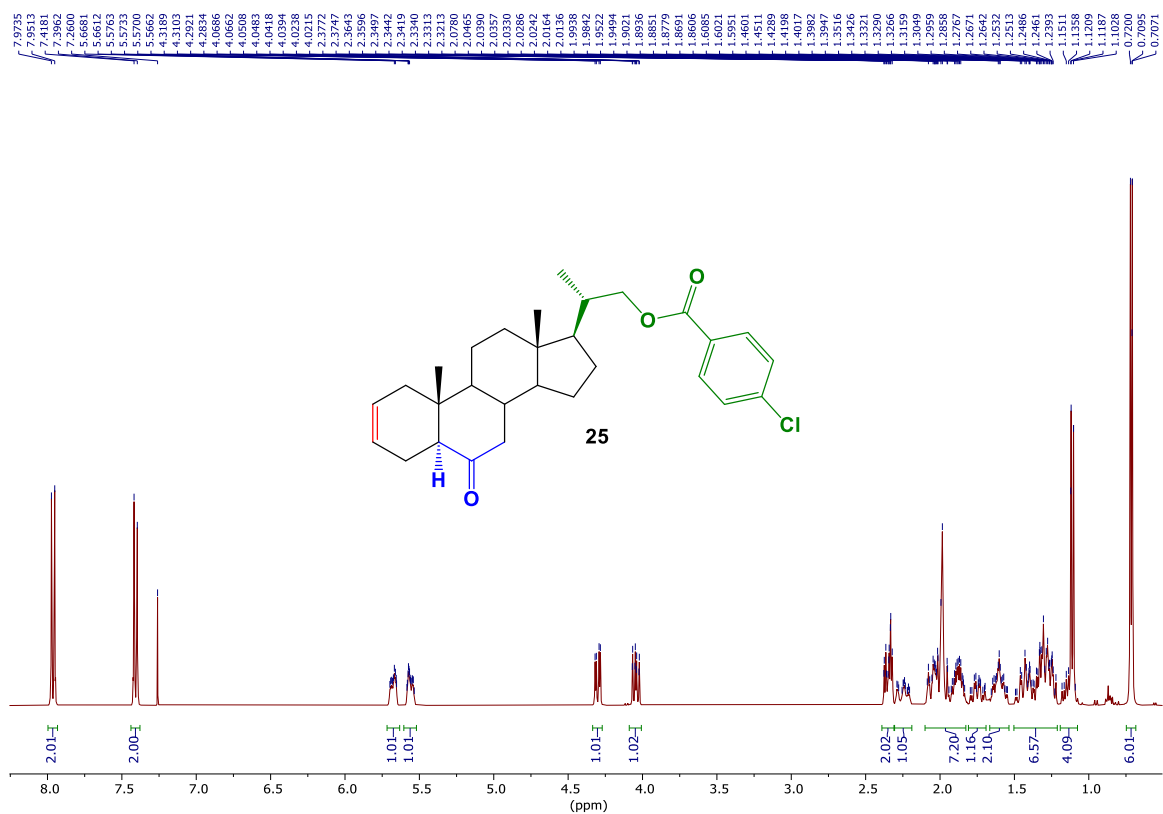

**Figure S11.** <sup>1</sup>H NMR spectrum of 5 $\alpha$ -cholan-6-oxo-2-ene-23,24-dinor-22-yl 4-chlorobenzoate (25).

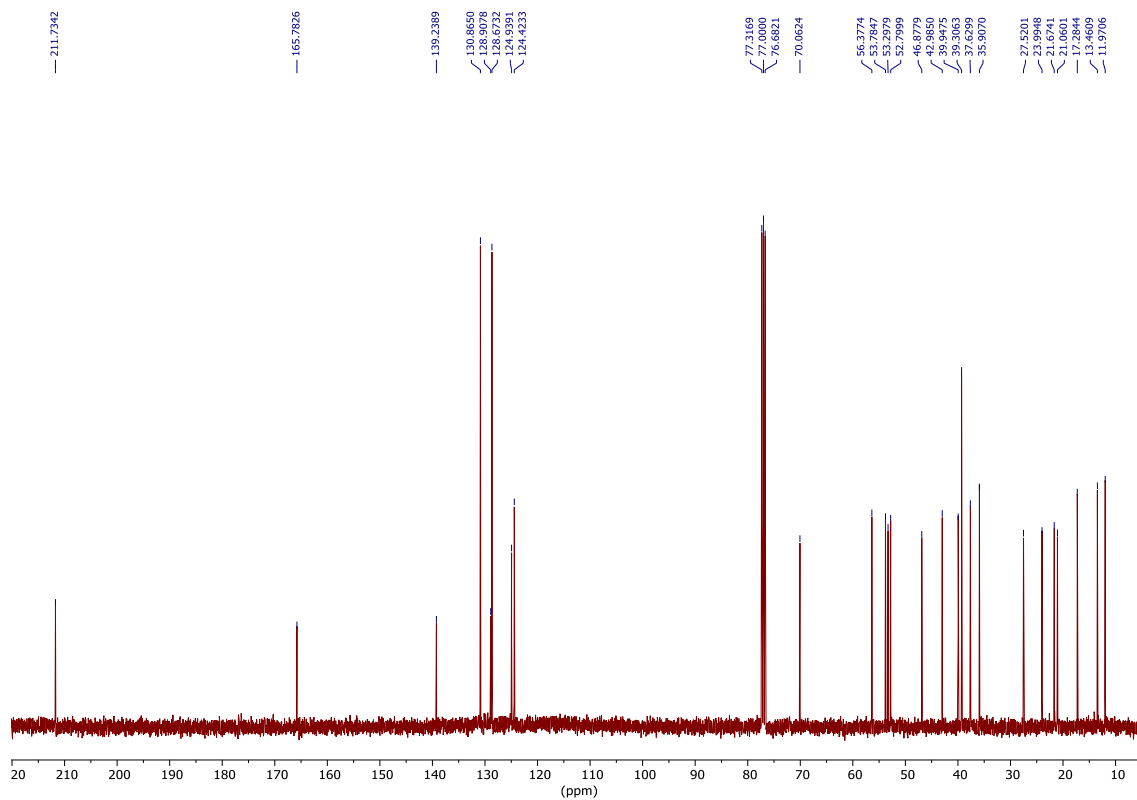

**Figure S12.** <sup>13</sup>C NMR spectrum of 5 $\alpha$ -cholan-6-oxo-2-ene-23,24-dinor-22-yl 4-chlorobenzoate (25).

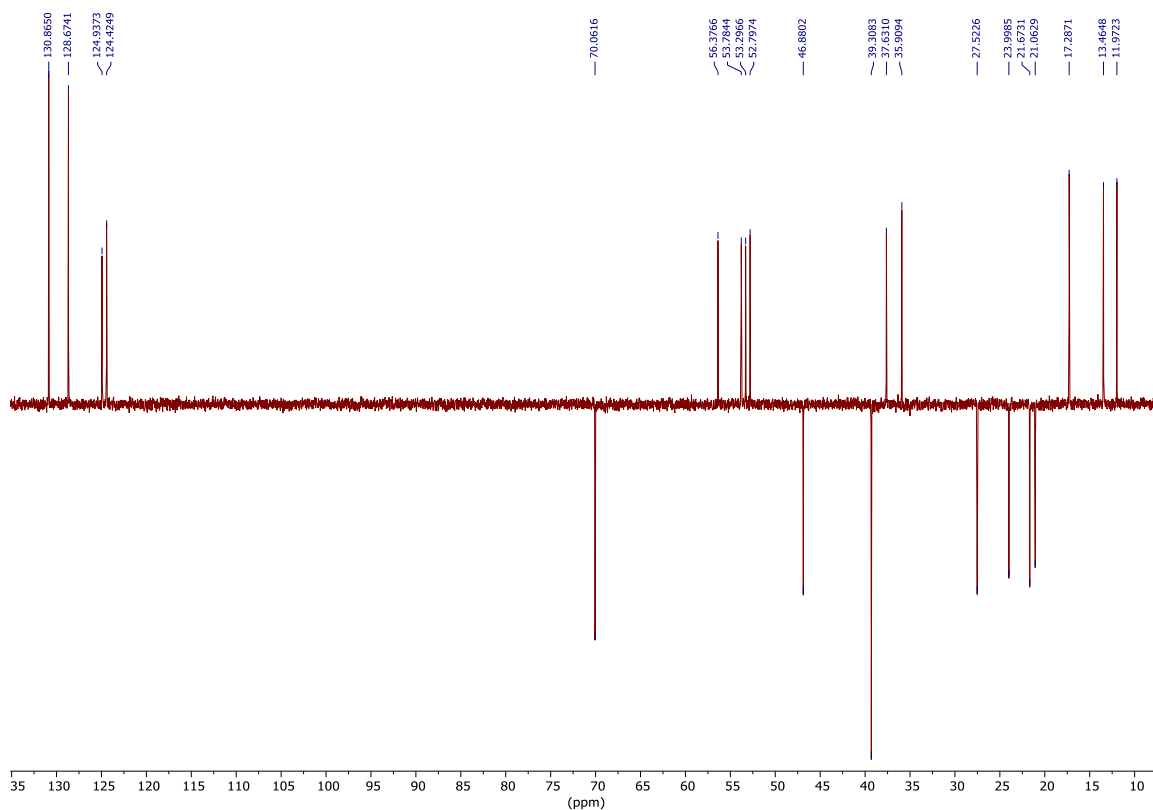

**Figure S13.**  $^{13}\text{C}$ -DEPT 135 NMR spectrum of 5 $\alpha$ -cholan-6-oxo-2-ene-23,24-dinor-22-yl 4-chlorobenzoate (**25**).

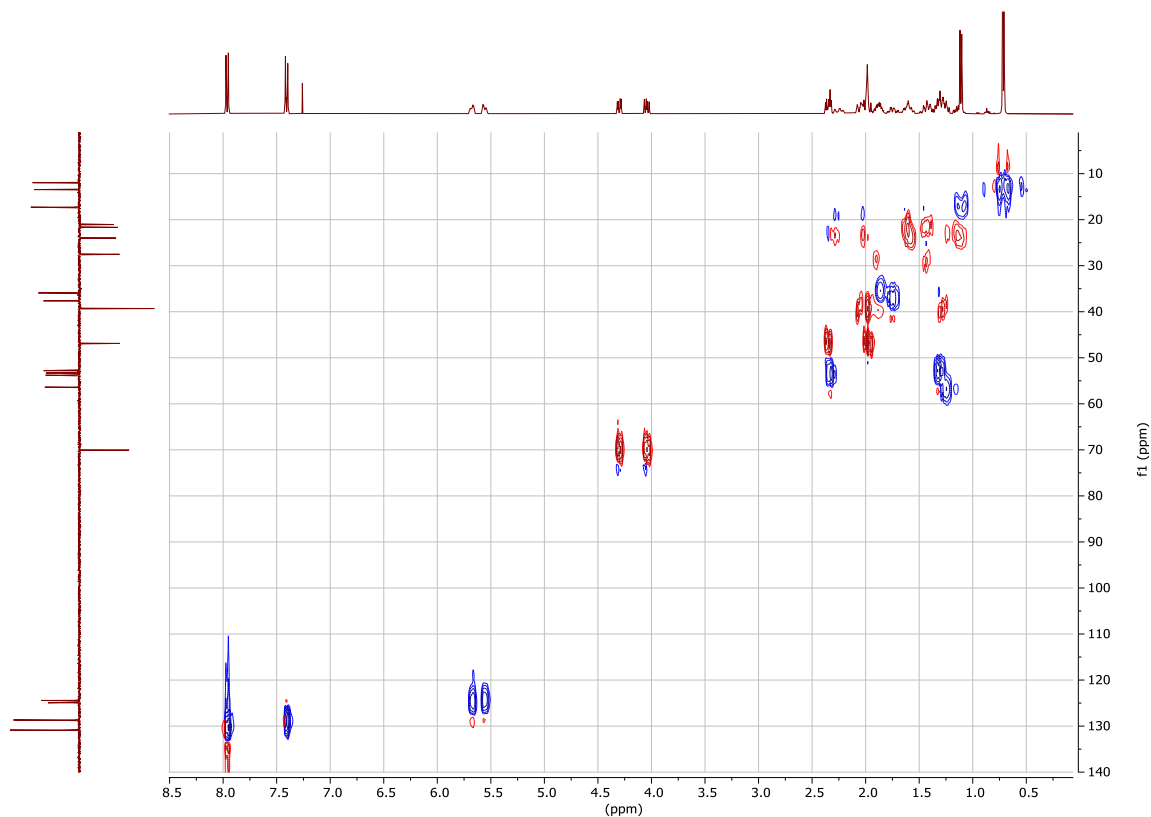

**Figure S14.**  $^1\text{H}$ - $^{13}\text{C}$  HSQC-ed. spectrum 5 $\alpha$ -cholan-6-oxo-2-ene-23,24-dinor-22-yl 4-chlorobenzoate (**25**).

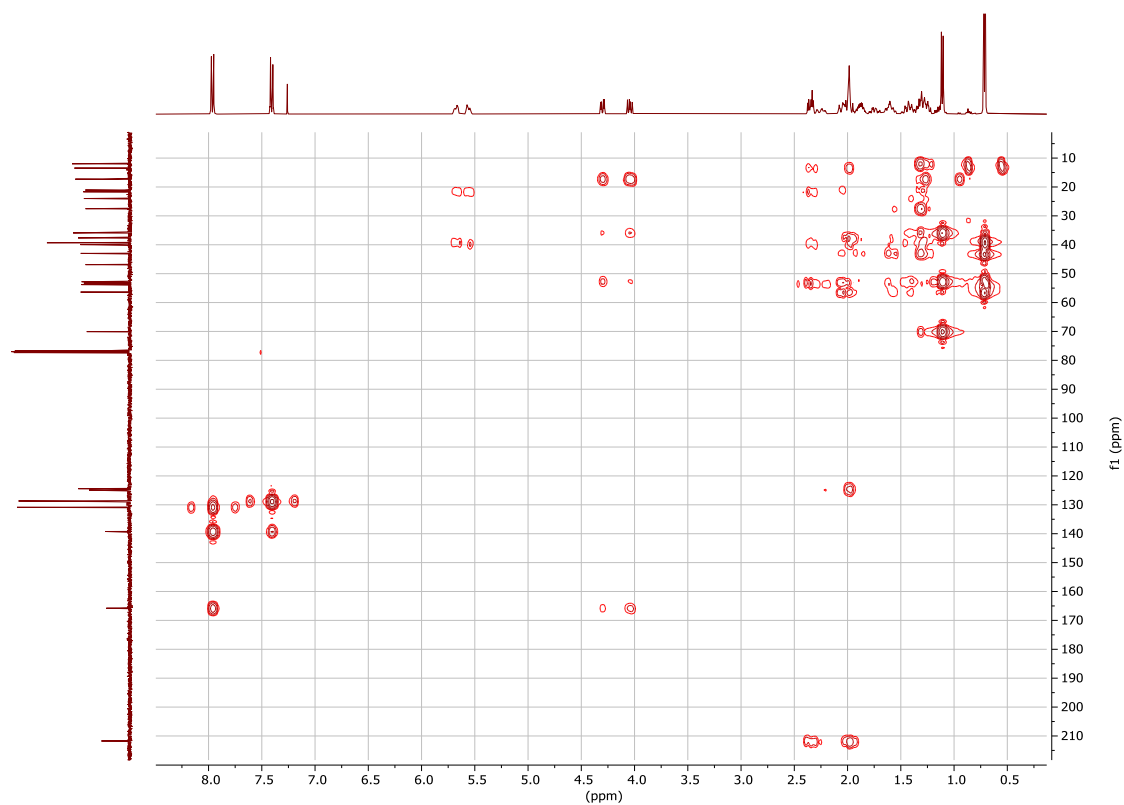

**Figure S15.**  $^1\text{H}$ - $^{13}\text{C}$  HMBC spectrum of 5 $\alpha$ -cholan-6-oxo-2-ene-23,24-dinor-22-yl 4-chlorobenzoate (**25**).

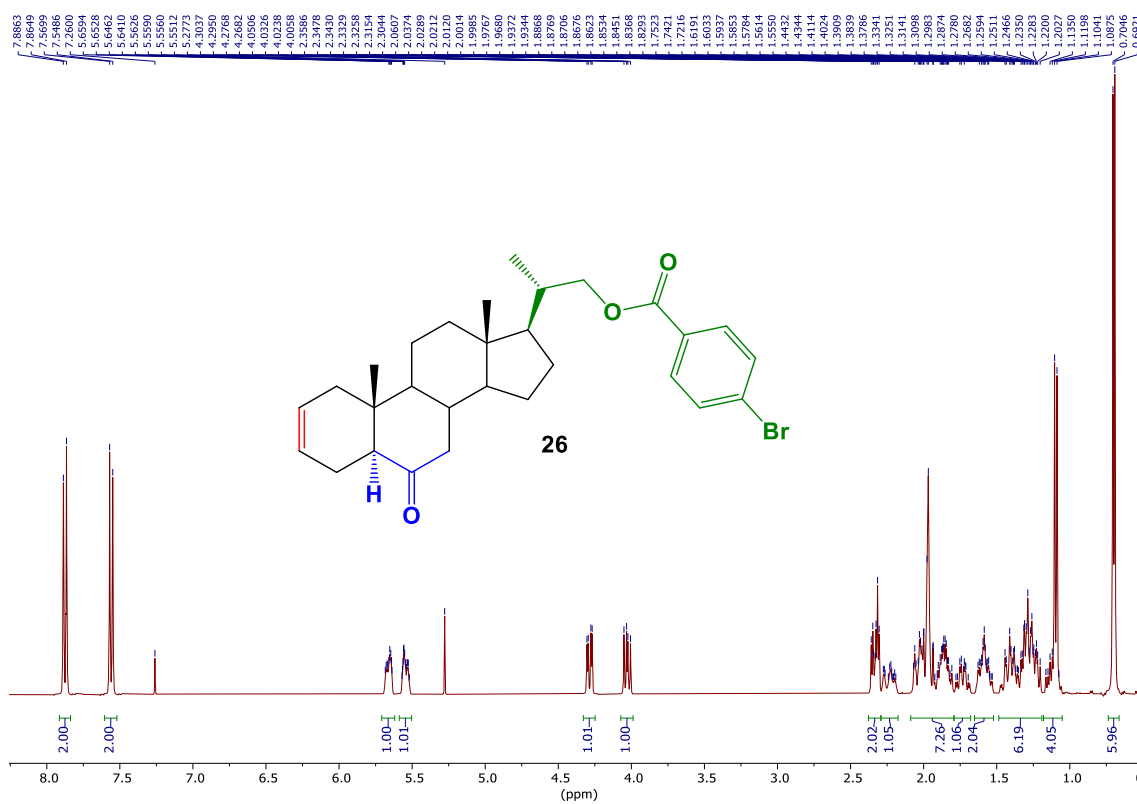

**Figure S16.**  $^1\text{H}$  NMR spectrum of 5 $\alpha$ -cholan-6-oxo-2-ene-23,24-dinor-22-yl 4-bromobenzoate (**26**).

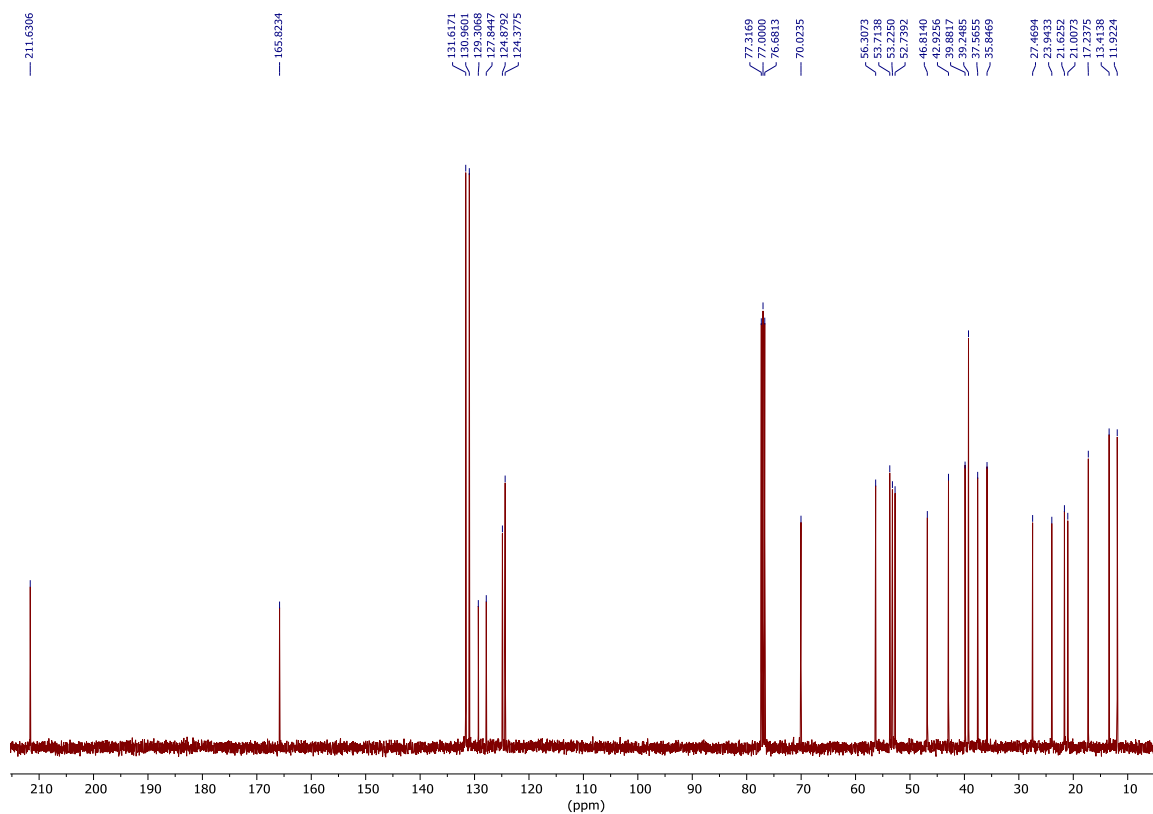

**Figure S17.**  $^{13}\text{C}$  NMR spectrum of 5 $\alpha$ -cholan-6-oxo-2-ene-23,24-dinor-22-yl 4-bromobenzoate (**26**).

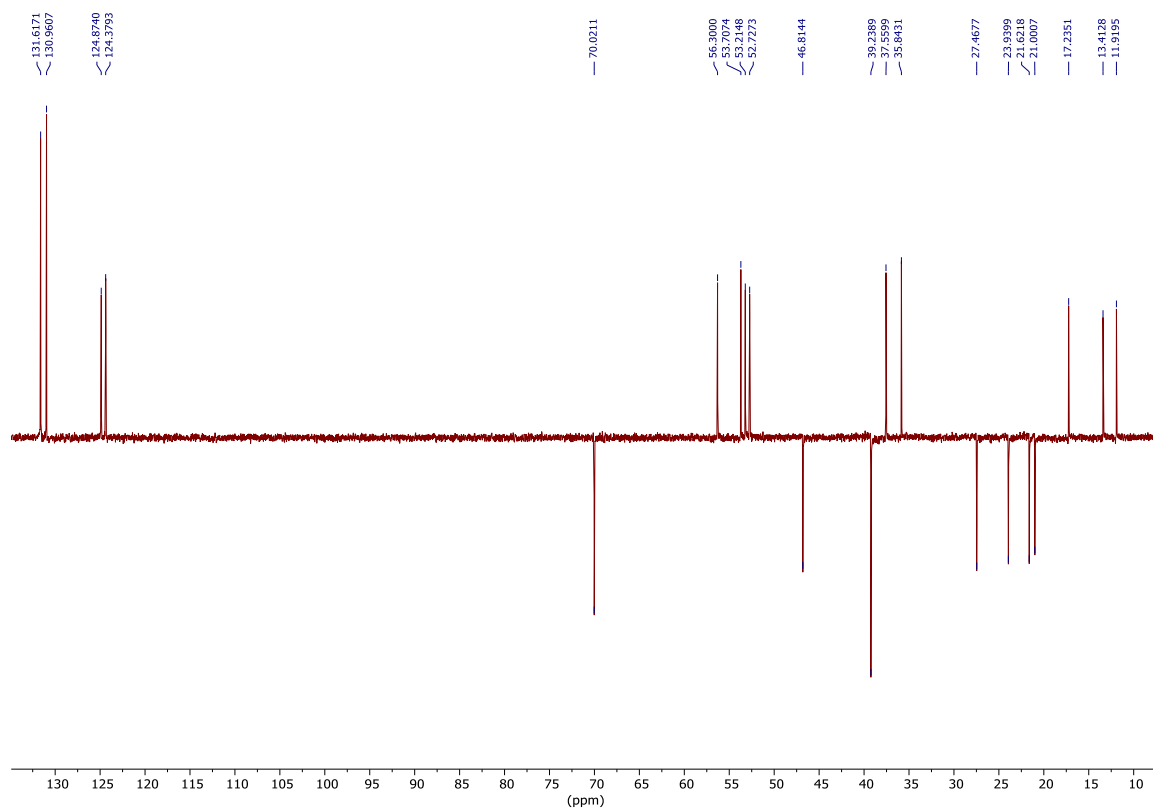

**Figure S18.**  $^{13}\text{C}$ -DEPT 135 NMR spectrum of 5 $\alpha$ -cholan-6-oxo-2-ene-23,24-dinor-22-yl 4-bromobenzoate (**26**).

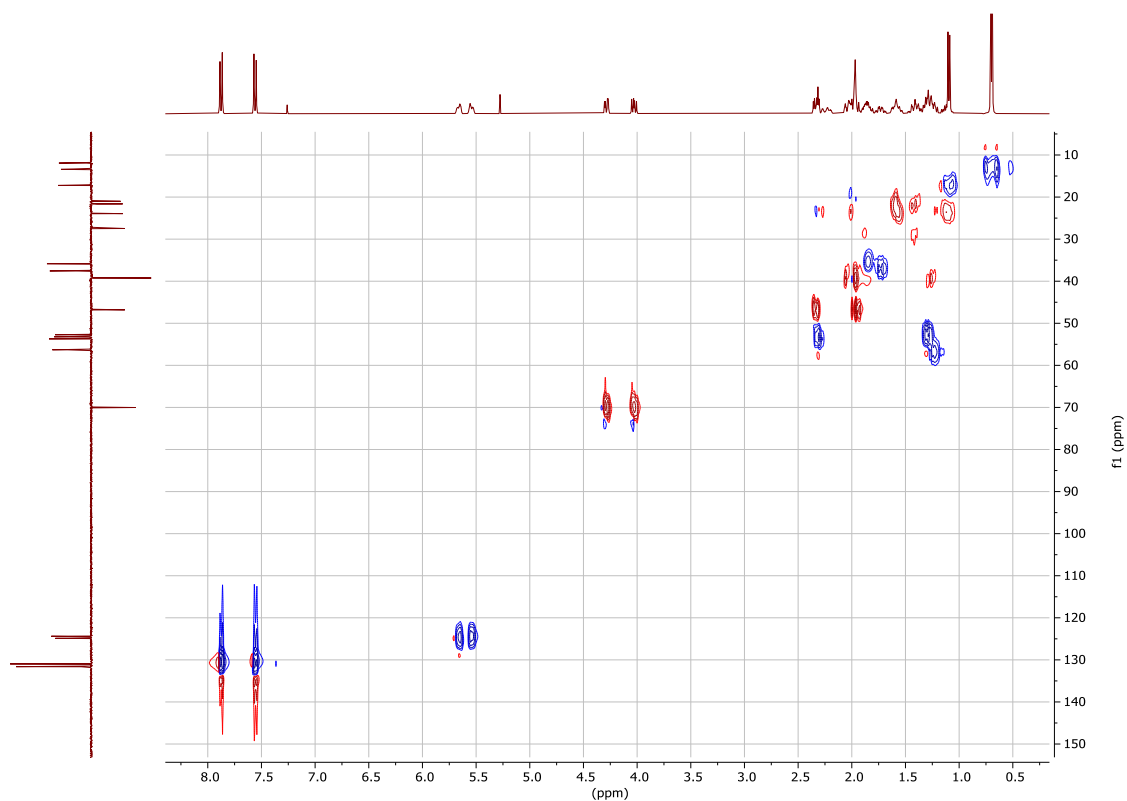

**Figure S19.**  $^1\text{H}$ - $^{13}\text{C}$  HSQC-ed. spectrum  $5\alpha$ -cholan-6-oxo-2-ene-23,24-dinor-22-yl 4-bromobenzoate (**26**).

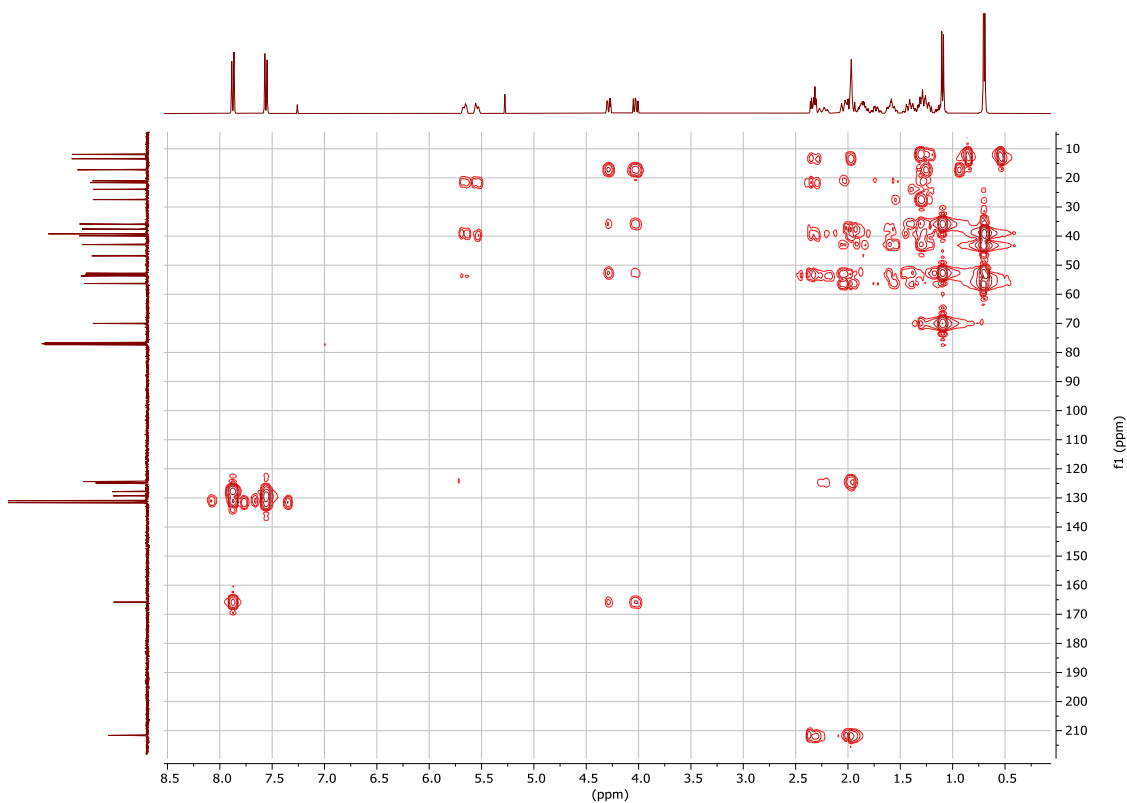

**Figure S20.**  $^1\text{H}$ - $^{13}\text{C}$  HMBC spectrum of  $5\alpha$ -cholan-6-oxo-2-ene-23,24-dinor-22-yl 4-bromobenzoate (**26**).

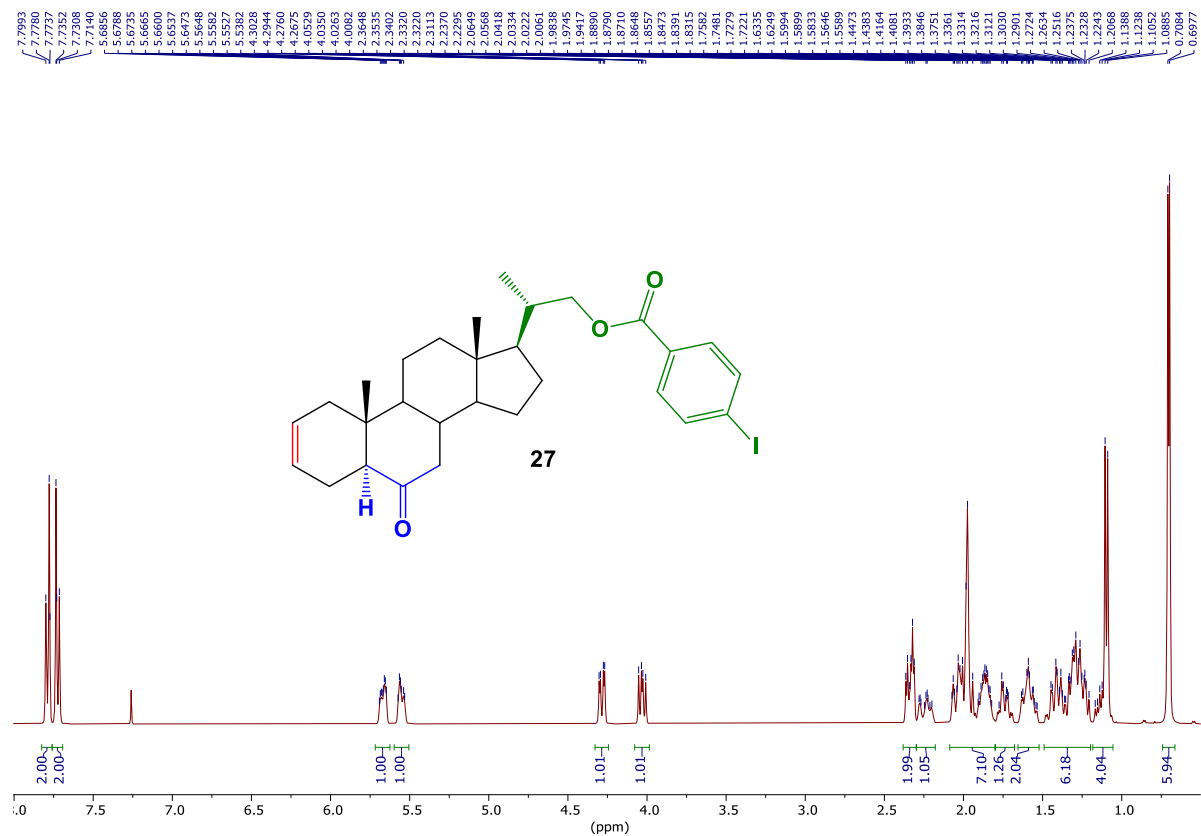

**Figure S21.** <sup>1</sup>H NMR spectrum of 5 $\alpha$ -cholan-6-oxo-2-ene-23,24-dinor-22-yl 4-iodobenzoate (27).

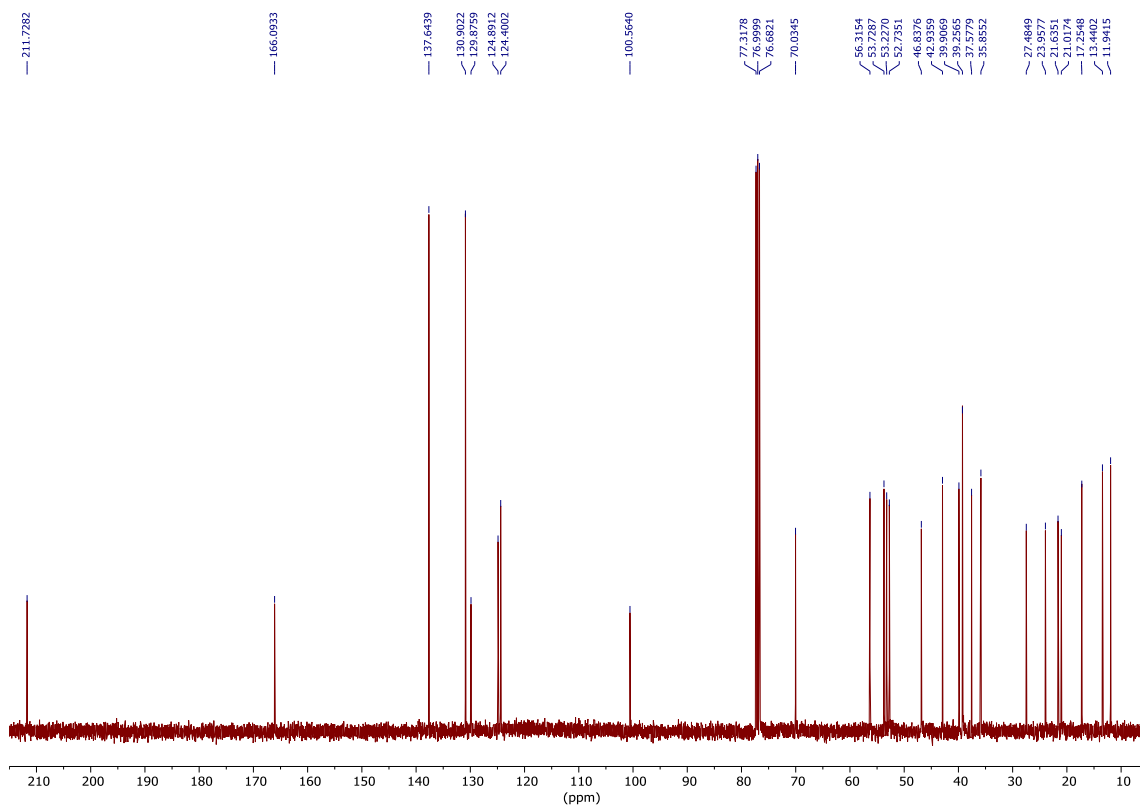

**Figure S22.** <sup>13</sup>C NMR spectrum of 5 $\alpha$ -cholan-6-oxo-2-ene-23,24-dinor-22-yl 4-iodobenzoate (27).

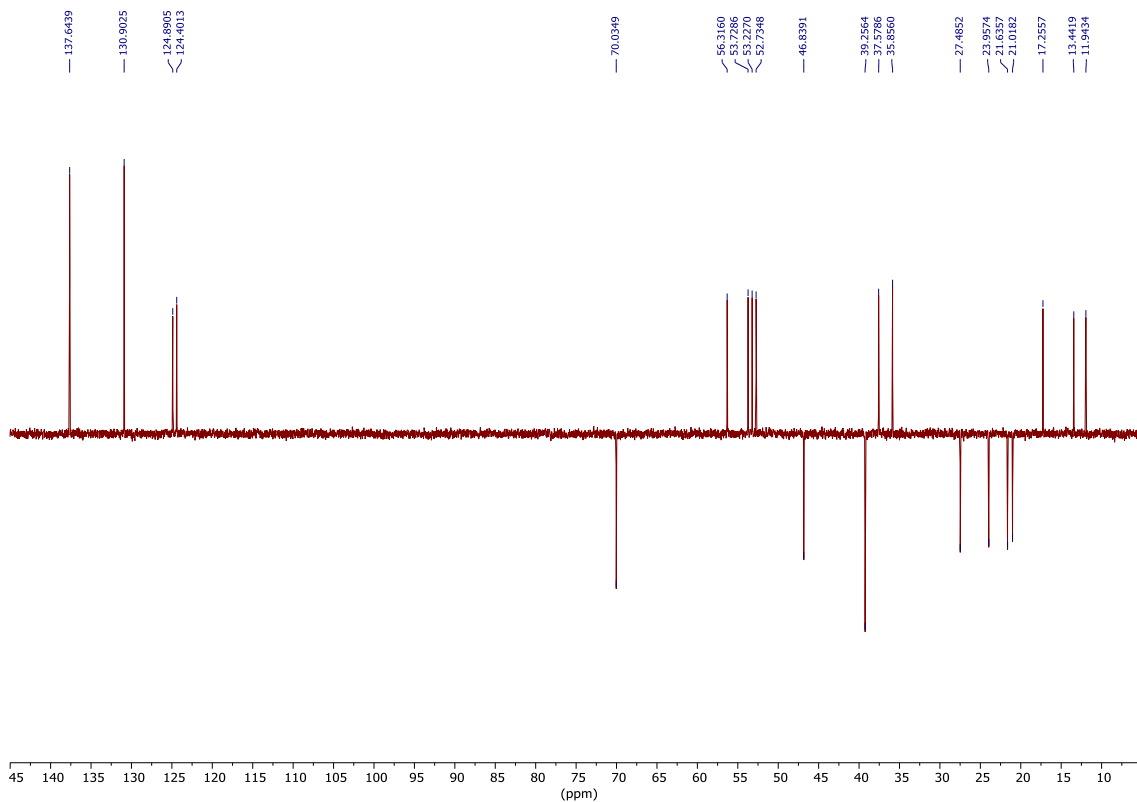

**Figure S23.**  $^{13}\text{C}$ -DEPT 135 NMR spectrum of 5 $\alpha$ -cholan-6-oxo-2-ene-23,24-dinor-22-yl 4-iodobenzoate (**27**).

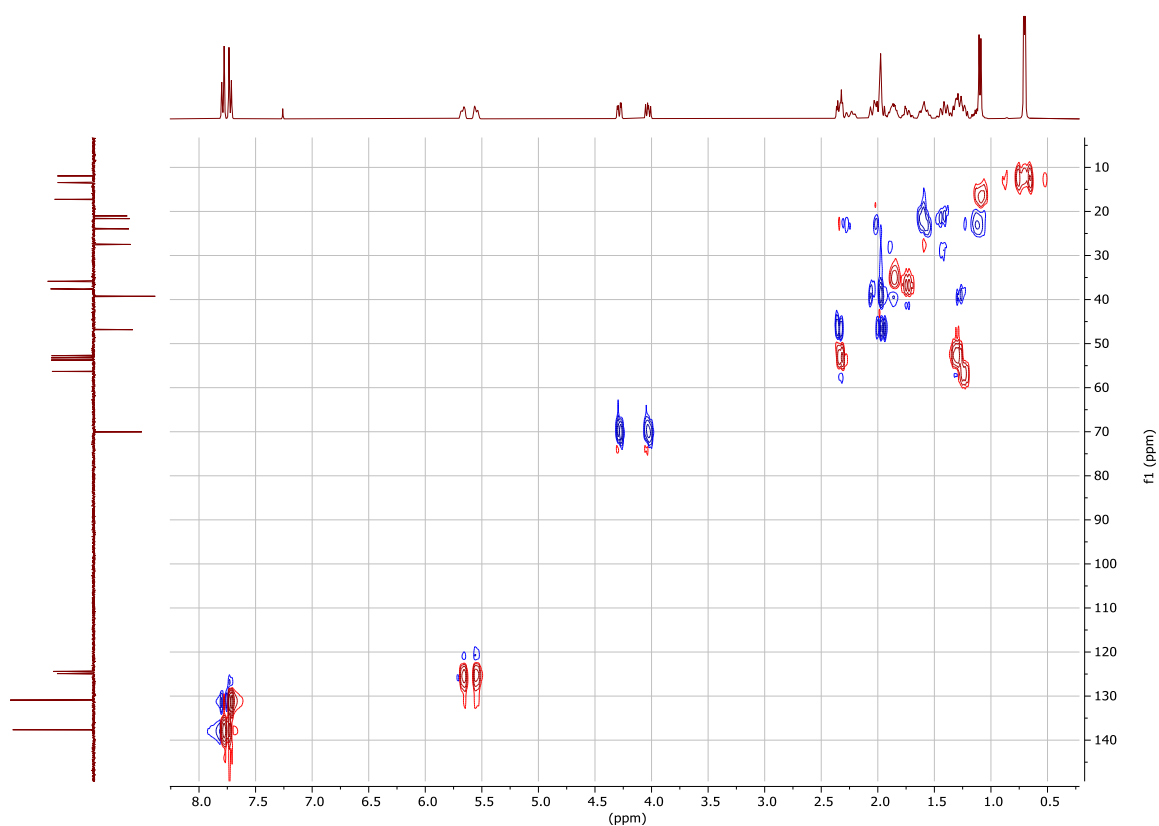

**Figure S24.**  $^1\text{H}$ - $^{13}\text{C}$  HSQC-ed. spectrum 5 $\alpha$ -cholan-6-oxo-2-ene-23,24-dinor-22-yl 4-iodinebenzoate (**27**).

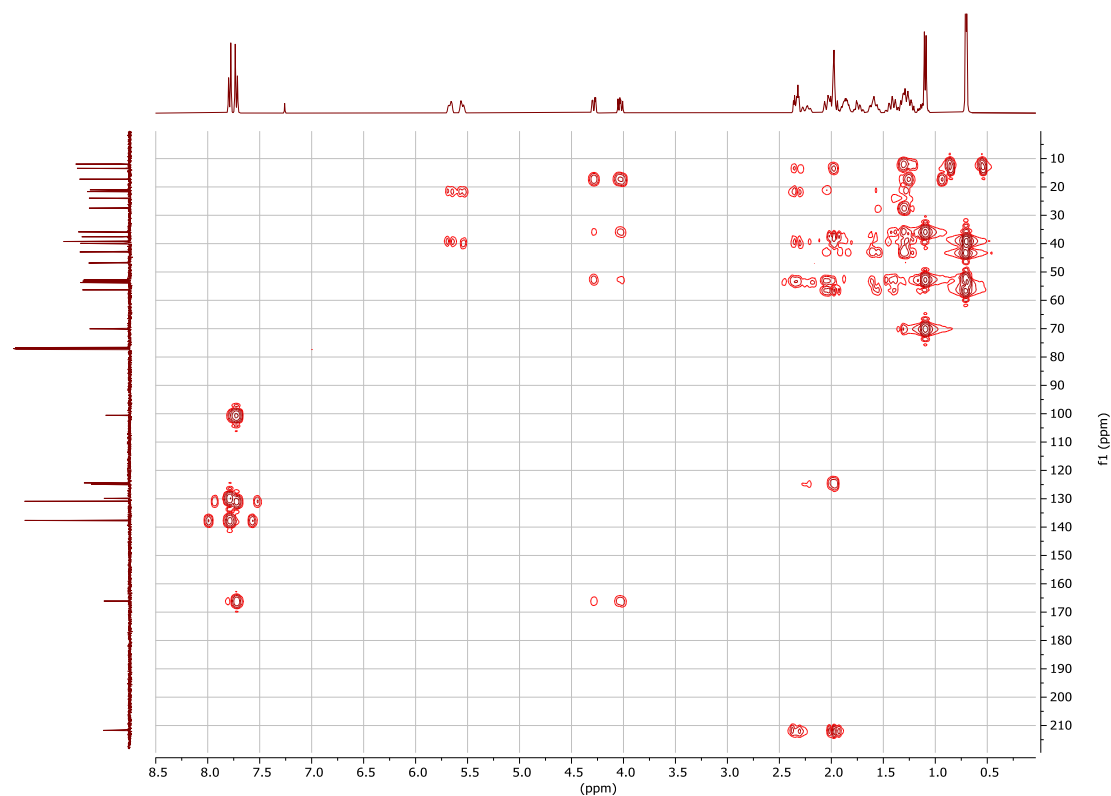

**Figure S25.**  $^1\text{H}$ - $^{13}\text{C}$  HMBC spectrum of 5 $\alpha$ -cholan-6-oxo-2-ene-23,24-dinor-22-yl 4-iodobenzoate (**27**).

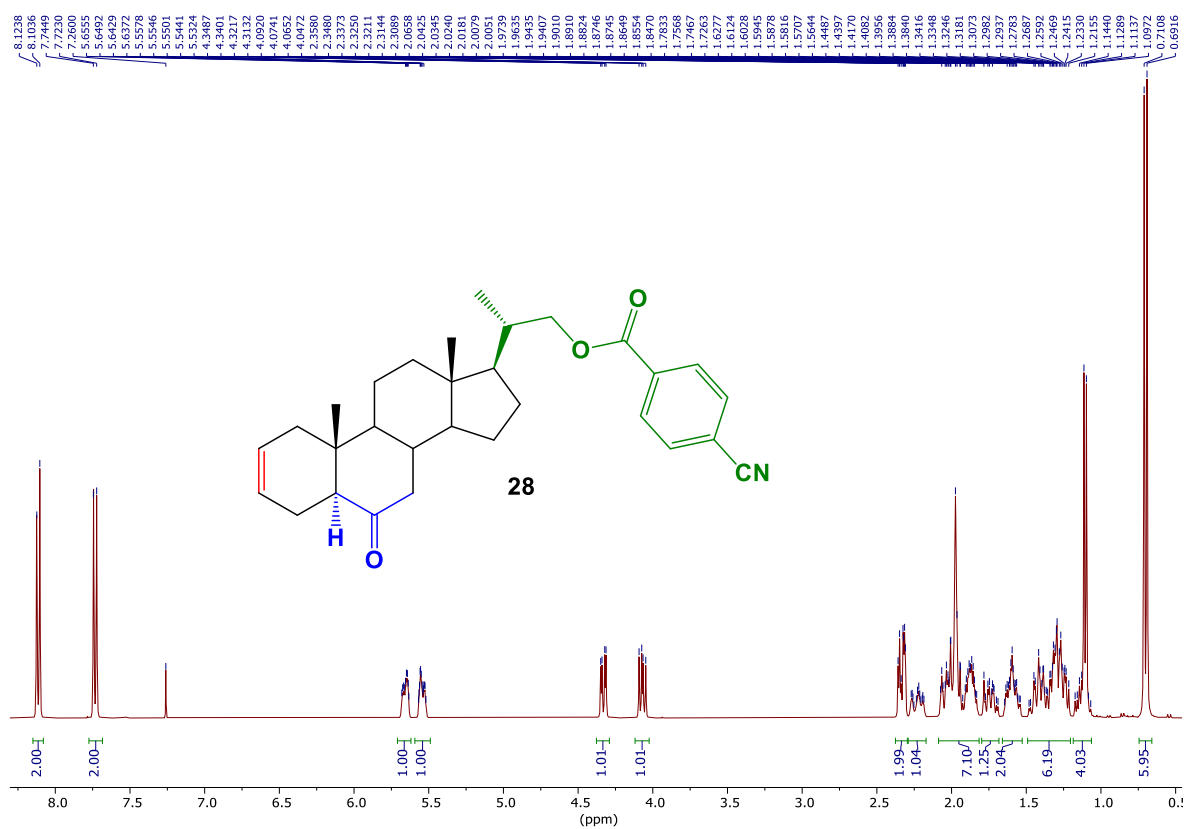

**Figure S26.**  $^1\text{H}$  NMR spectrum of 5 $\alpha$ -cholan-6-oxo-2-ene-23,24-dinor-22-yl 4-cyanobenzoate (**28**).

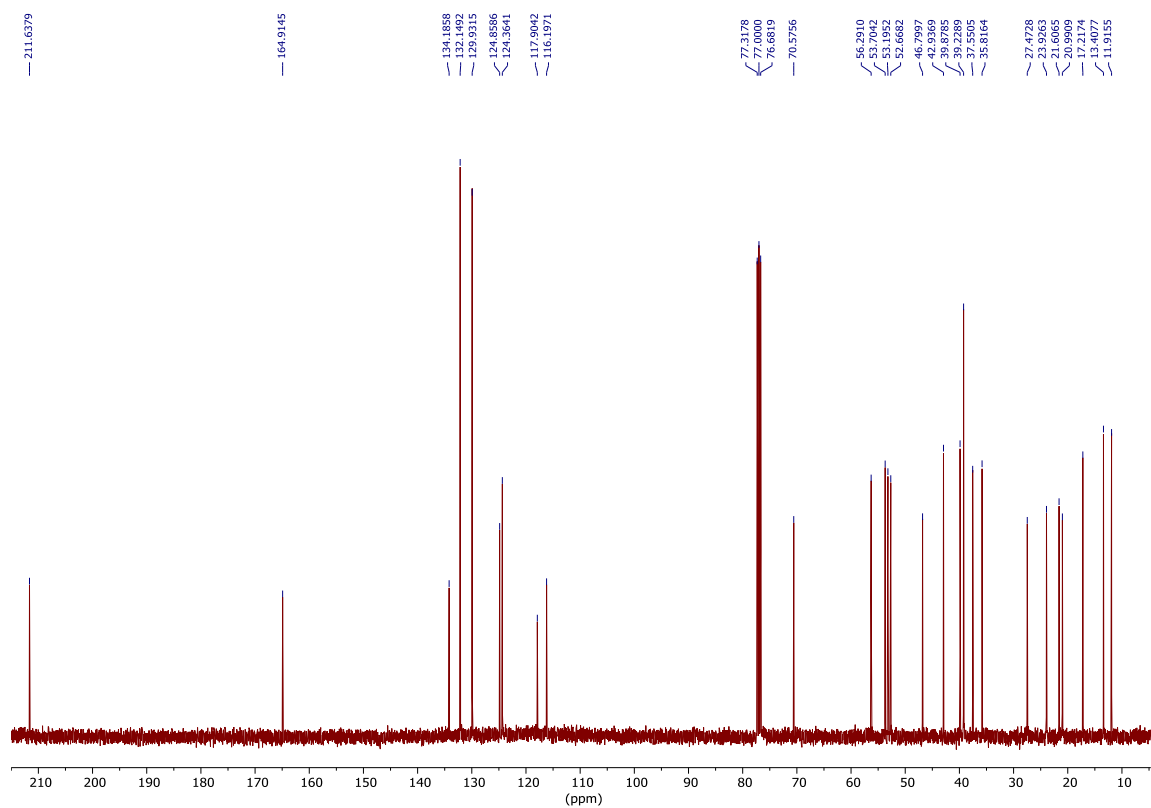

**Figure S27.**  $^{13}\text{C}$  NMR spectrum of 5 $\alpha$ -cholan-6-oxo-2-ene-23,24-dinor-22-yl 4-cyanobenzoate (**28**).

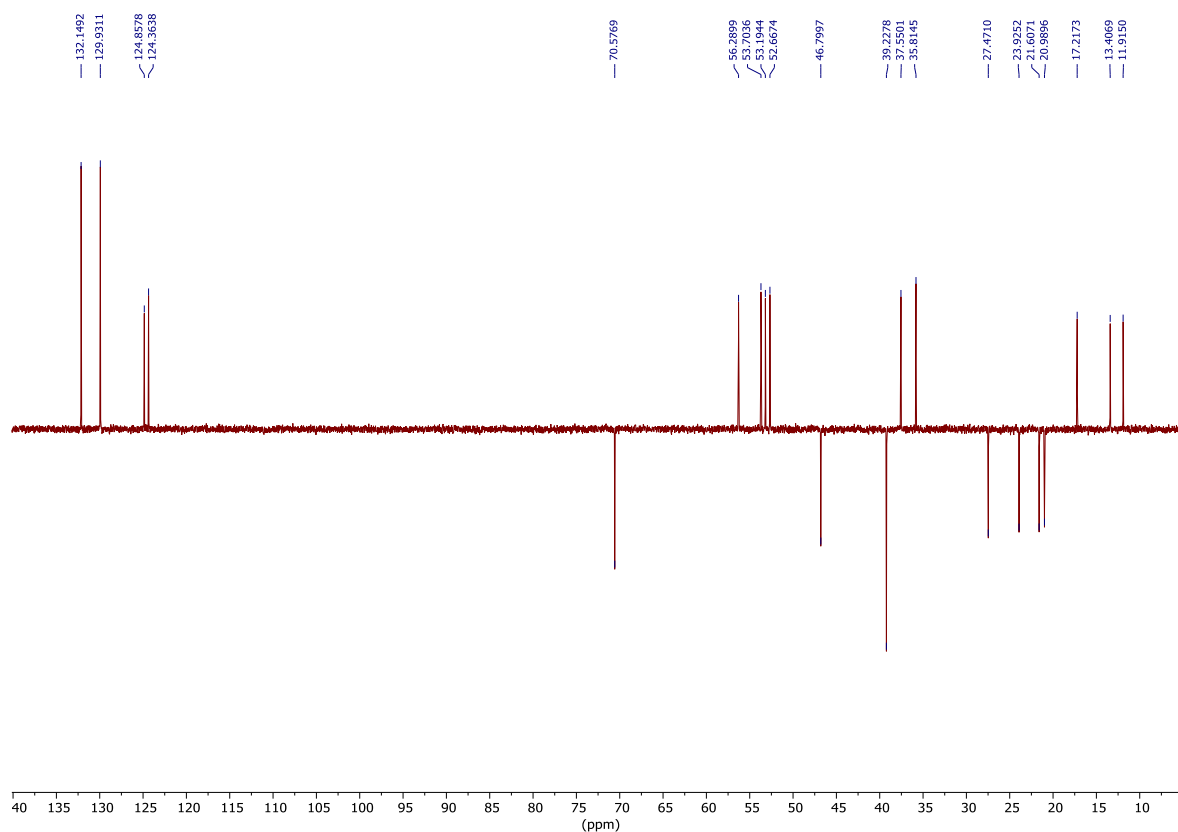

**Figure S28.**  $^{13}\text{C}$ -DEPT 135 NMR spectrum of 5 $\alpha$ -cholan-6-oxo-2-ene-23,24-dinor-22-yl 4-cyanobenzoate (**28**).

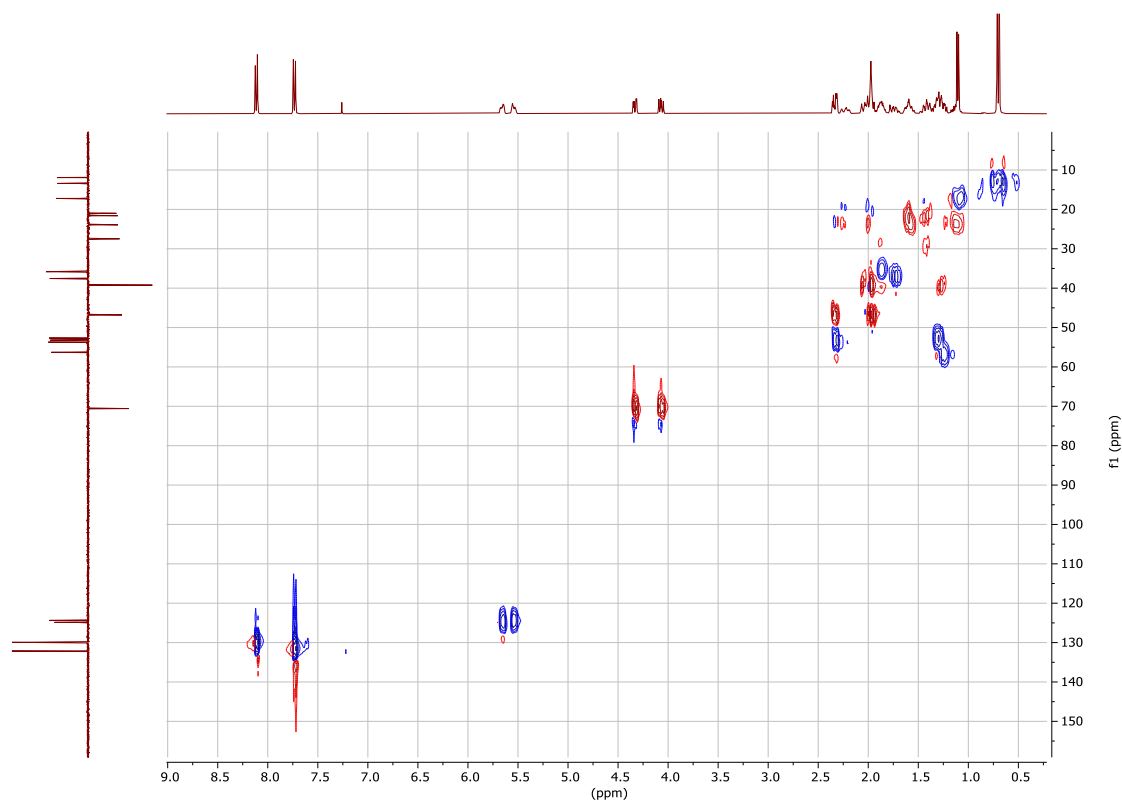

**Figure S29.**  $^1\text{H}$ - $^{13}\text{C}$  HSQC-ed. spectrum  $5\alpha$ -cholan-6-oxo-2-ene-23,24-dinor-22-yl 4-cyanobenzoate (**28**).

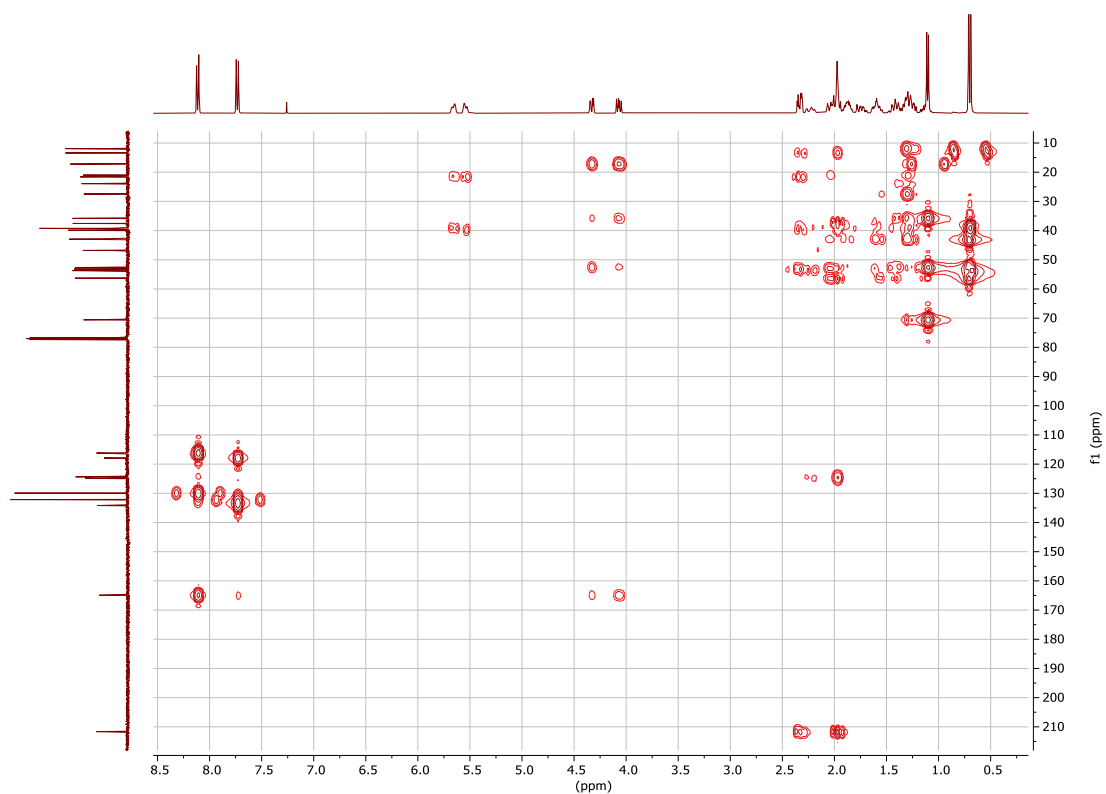

**Figure S30.**  $^1\text{H}$ - $^{13}\text{C}$  HMBC spectrum of  $5\alpha$ -cholan-6-oxo-2-ene-23,24-dinor-22-yl 4-cyanobenzoate (**28**).

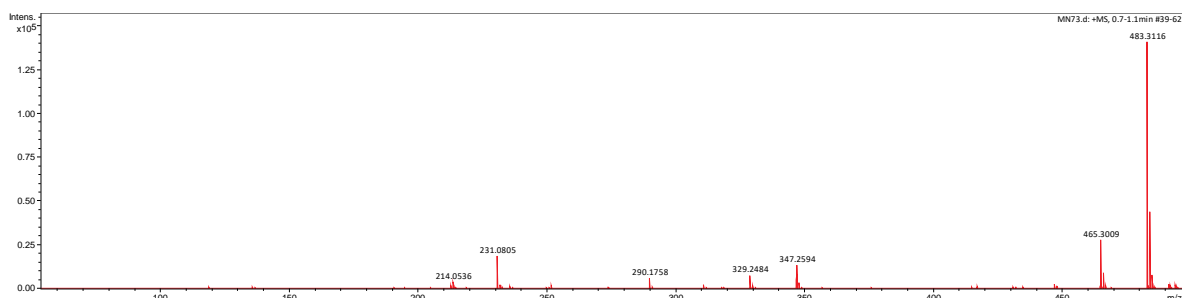

**Figure S31.** HRMS spectrum of 2 $\alpha$ ,3 $\alpha$ -dihydroxy-5 $\alpha$ -cholan-6-oxo-23,24-dinor-22-yl 4-methylbenzoate (**17**).

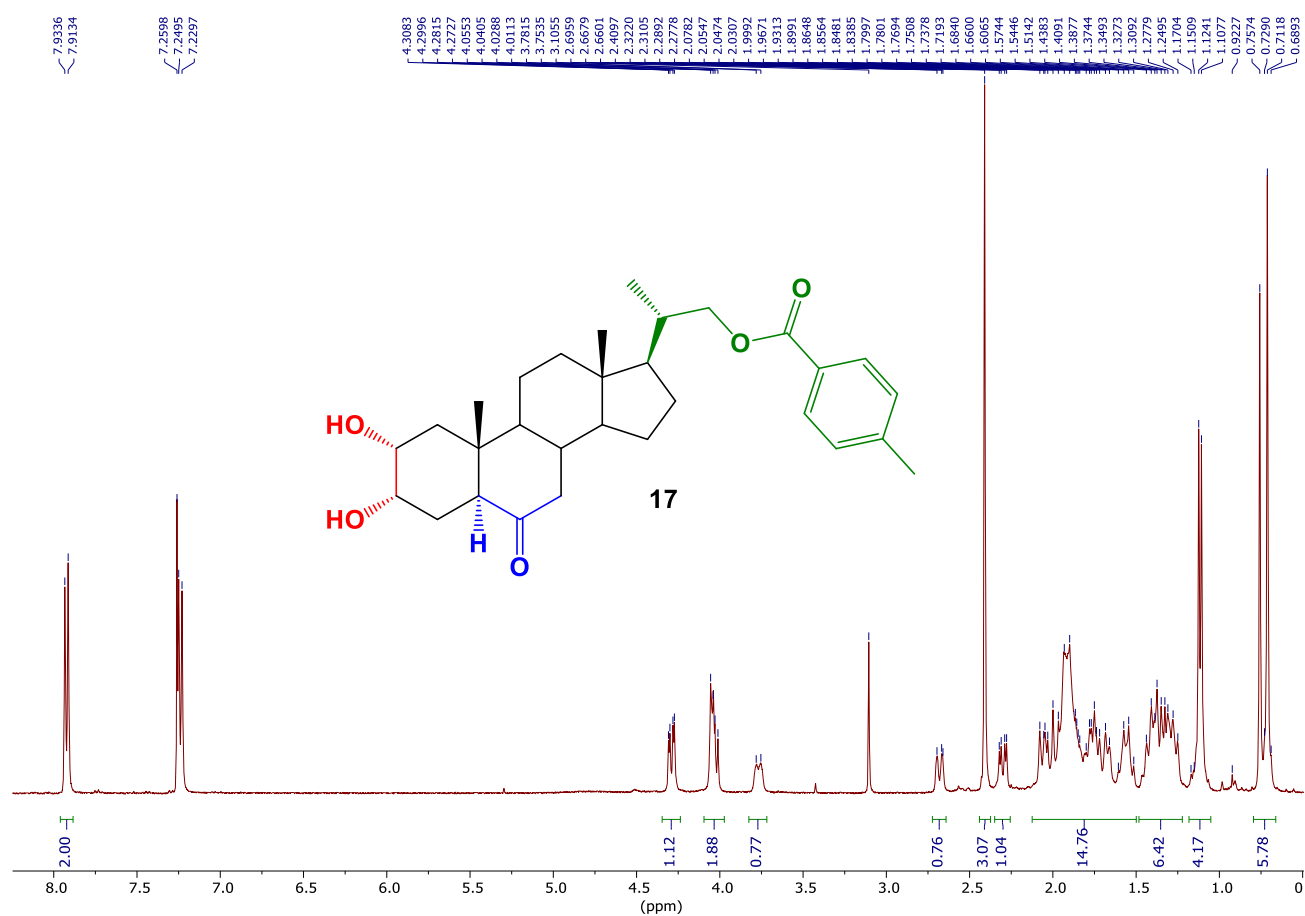

**Figure S32.**  $^1\text{H}$  NMR spectrum of 2 $\alpha$ ,3 $\alpha$ -dihydroxy-5 $\alpha$ -cholan-6-oxo-23,24-dinor-22-yl 4-methylbenzoate (**17**).

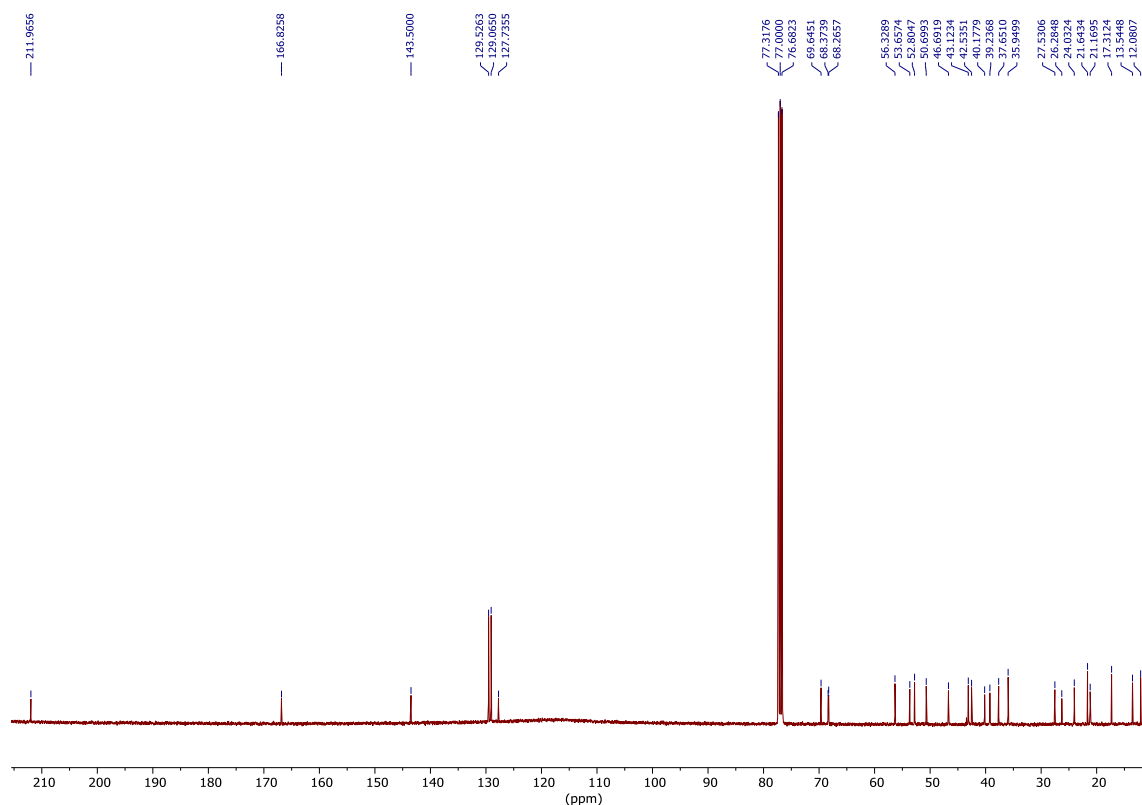

**Figure S33.**  $^{13}\text{C}$  NMR spectrum of 2 $\alpha$ ,3 $\alpha$ -dihydroxy-5 $\alpha$ -cholan-6-oxo-23,24-dinor-22-yl 4-methylbenzoate (**17**).

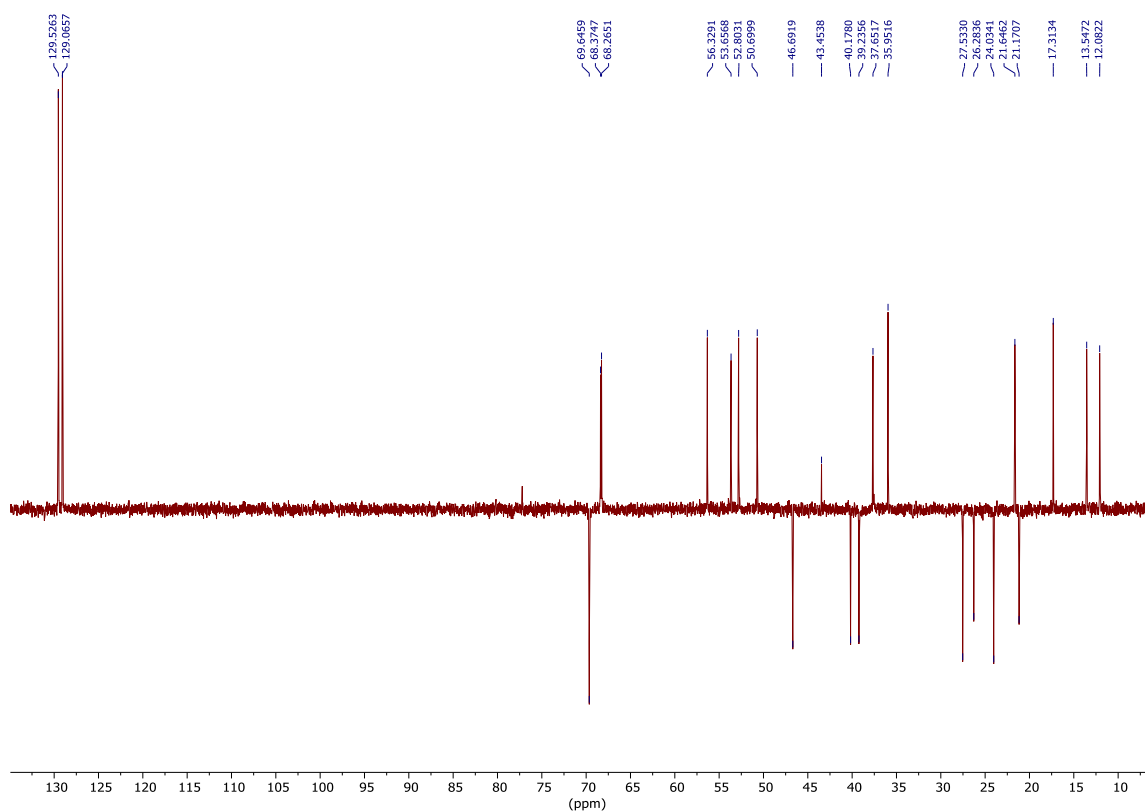

**Figure S34.**  $^{13}\text{C}$ -DEPT 135 NMR spectrum of 2 $\alpha$ ,3 $\alpha$ -dihydroxy-5 $\alpha$ -cholan-6-oxo-23,24-dinor-22-yl 4-methylbenzoate (**17**).

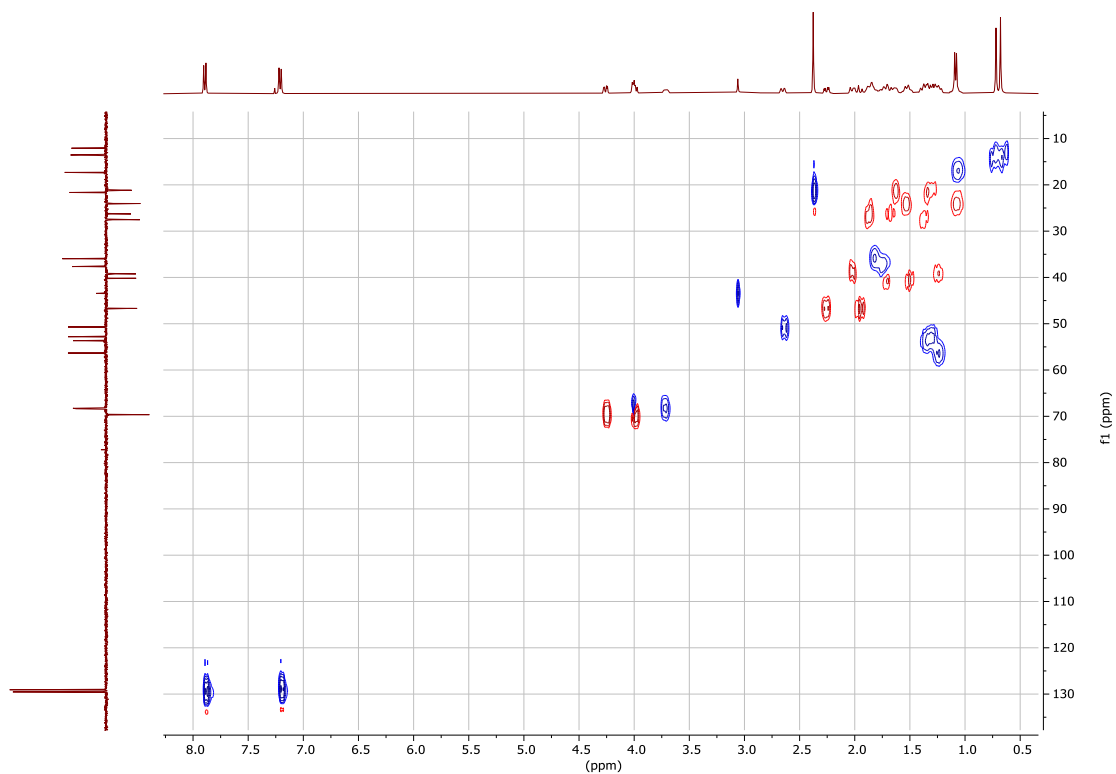

**Figure S35.**  $^1\text{H}$ - $^{13}\text{C}$  HSQC-ed. spectrum  $2\alpha,3\alpha$ -dihydroxy- $5\alpha$ -cholan-6-oxo-23,24-dinor-22-yl 4-methylbenzoate (**17**).

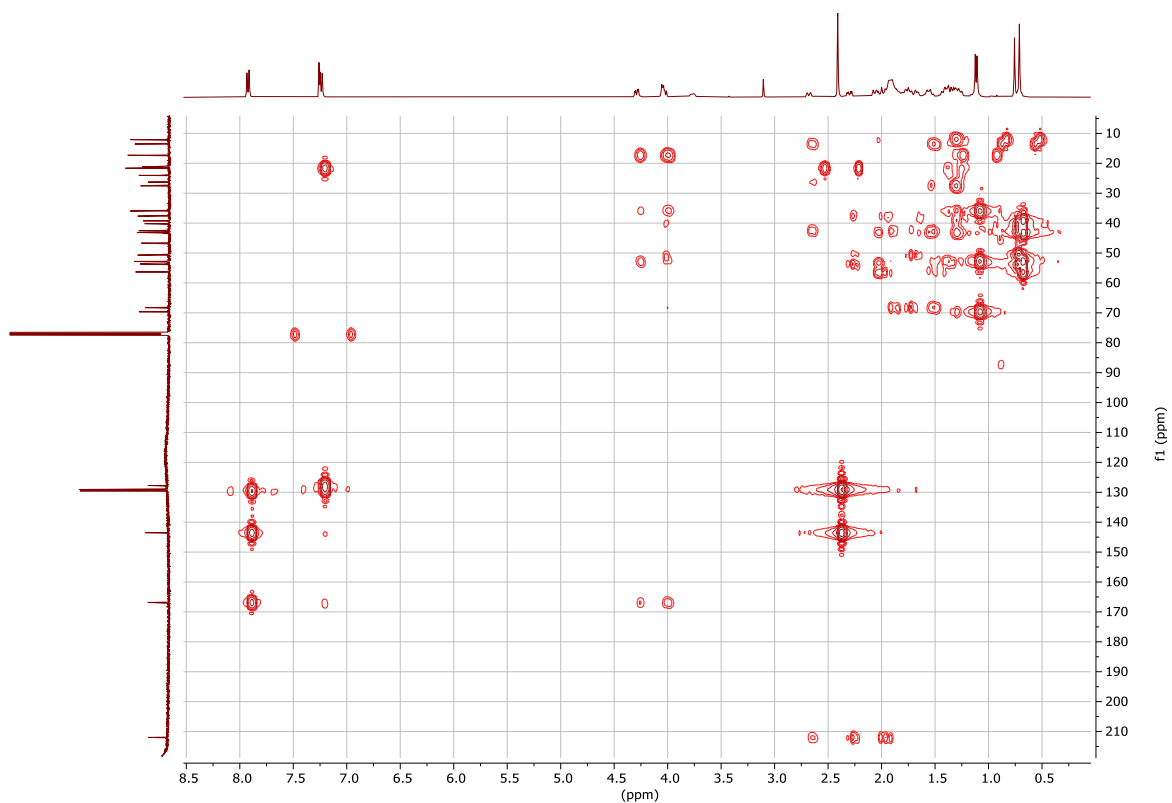

**Figure S36.**  $^1\text{H}$ - $^{13}\text{C}$  HMBC spectrum of  $2\alpha,3\alpha$ -dihydroxy- $5\alpha$ -cholan-6-oxo-23,24-dinor-22-yl 4-methylbenzoate (**17**).

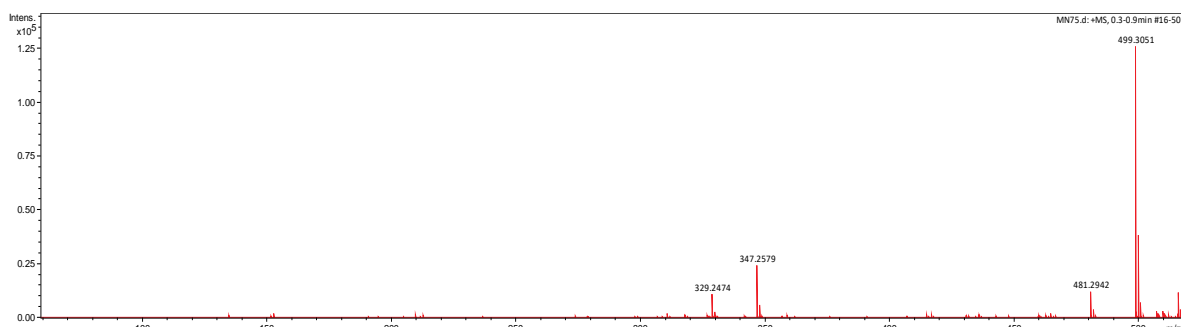

**Figure S37.** HRMS spectrum of 2 $\alpha$ ,3 $\alpha$ -dihydroxy-5 $\alpha$ -cholan-6-oxo-23,24-dinor-22-yl 4-methoxybenzoate (**18**).

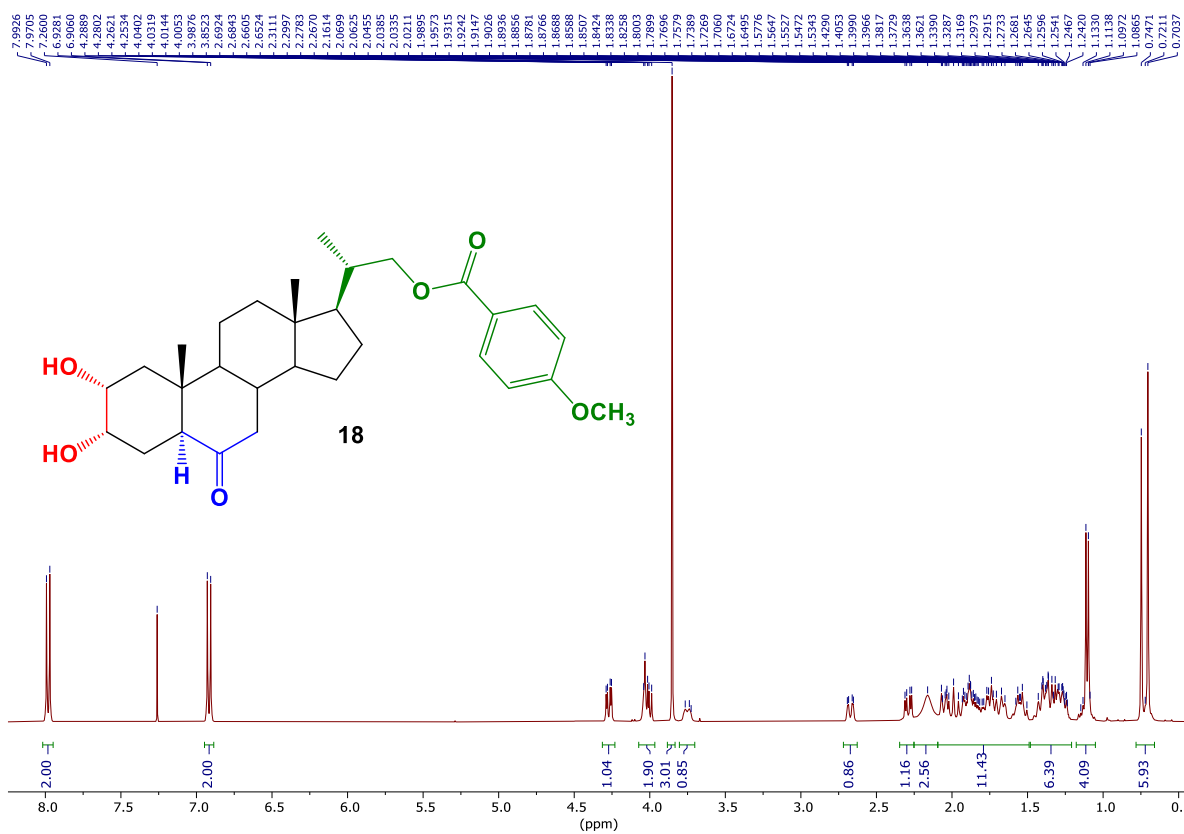

**Figure S38.** <sup>1</sup>H NMR spectrum of 2 $\alpha$ ,3 $\alpha$ -dihydroxy-5 $\alpha$ -cholan-6-oxo-23,24-dinor-22-yl 4-methoxybenzoate (**18**).

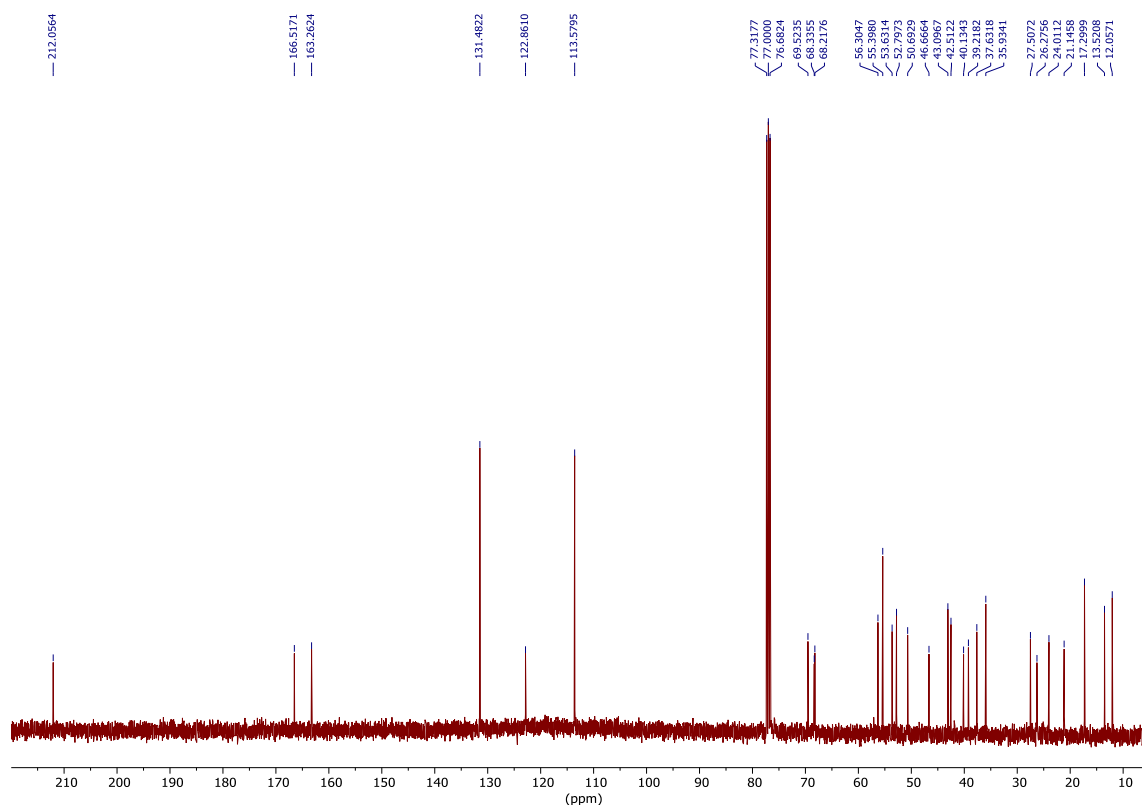

**Figure S39.**  $^{13}\text{C}$  NMR spectrum of 2 $\alpha$ ,3 $\alpha$ -dihydroxy-5 $\alpha$ -cholan-6-oxo-23,24-dinor-22-yl 4-methoxybenzoate (**18**).

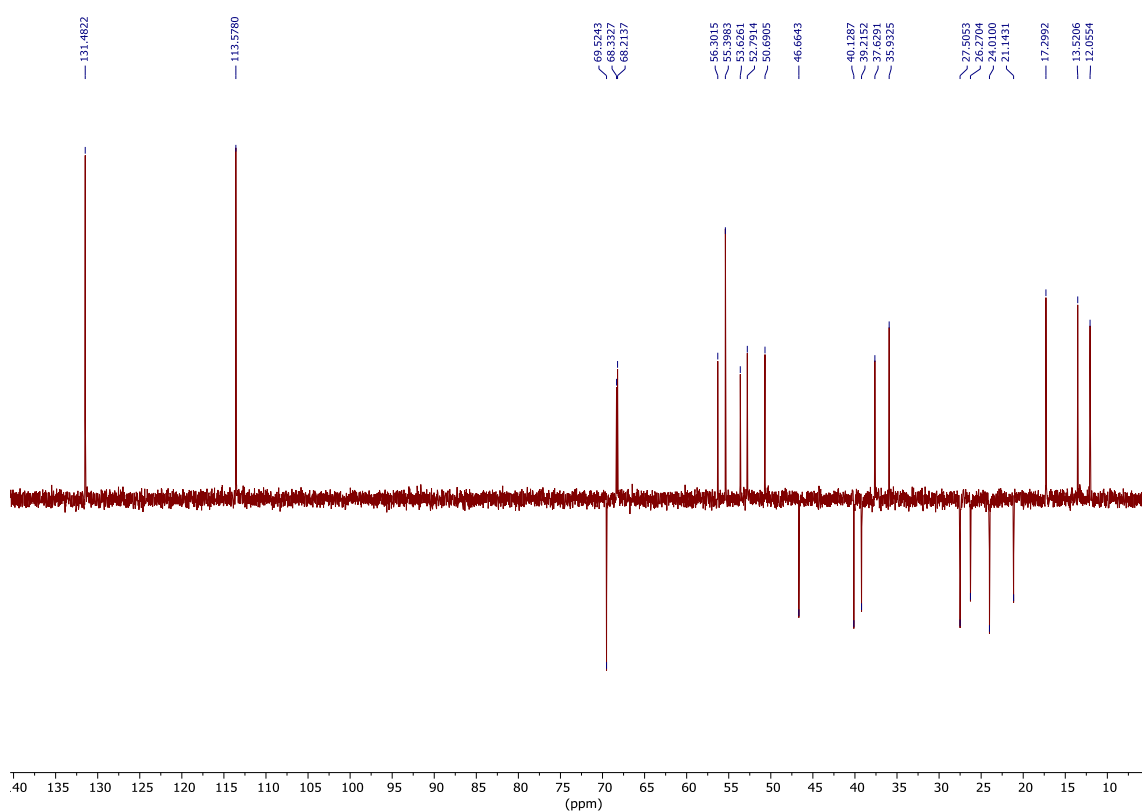

**Figure S40.**  $^{13}\text{C}$ -DEPT 135 NMR spectrum of 2 $\alpha$ ,3 $\alpha$ -dihydroxy-5 $\alpha$ -cholan-6-oxo-23,24-dinor-22-yl 4-methoxybenzoate (**18**).

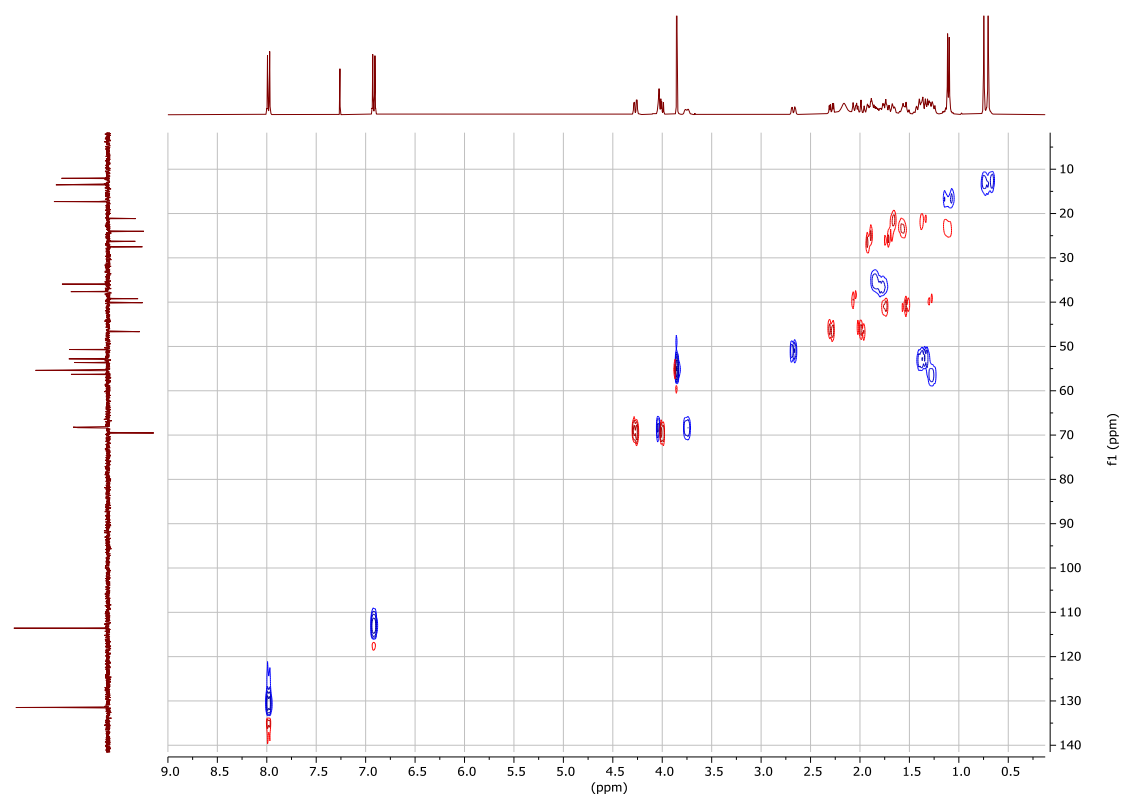

**Figure S41.**  $^1\text{H}$ - $^{13}\text{C}$  HSQC-ed. spectrum  $2\alpha,3\alpha$ -dihydroxy- $5\alpha$ -cholan-6-oxo-23,24-dinor-22-yl 4-methoxybenzoate (**18**).

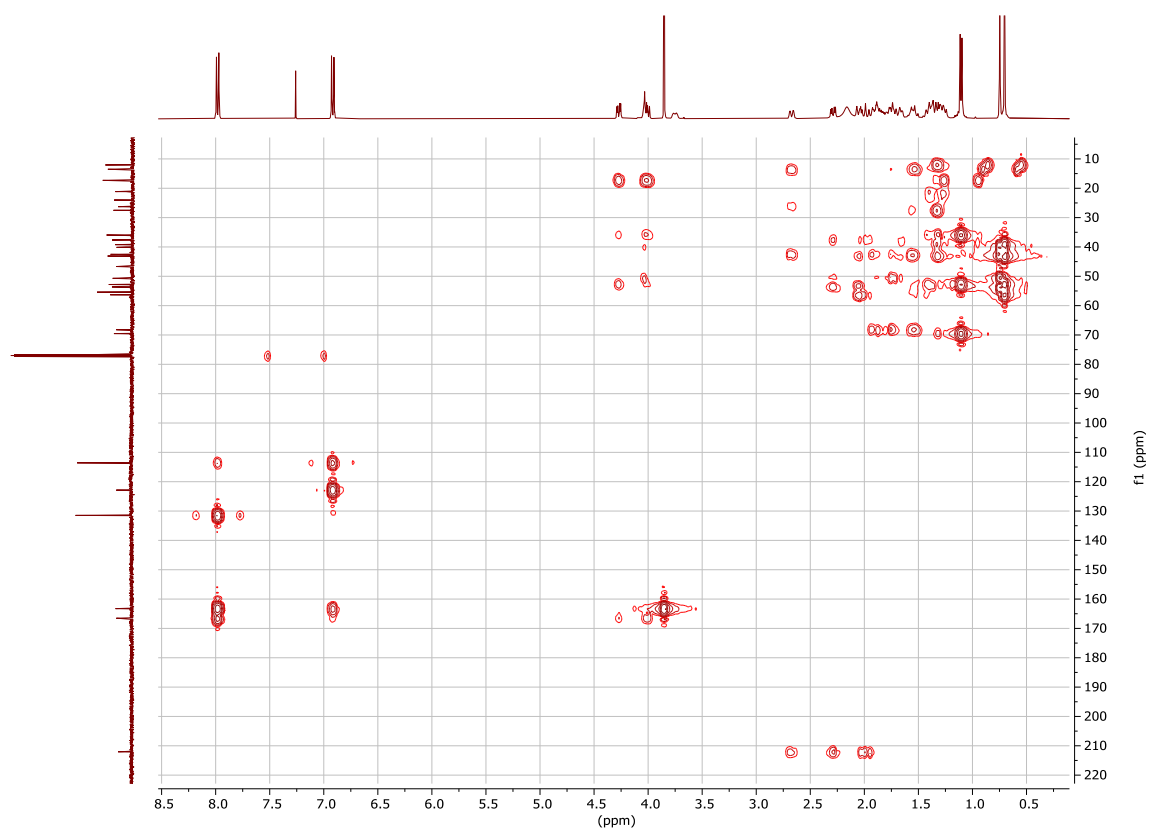

**Figure S42.**  $^1\text{H}$ - $^{13}\text{C}$  HMBC spectrum of  $2\alpha,3\alpha$ -dihydroxy- $5\alpha$ -cholan-6-oxo-23,24-dinor-22-yl 4-methoxybenzoate (**18**).

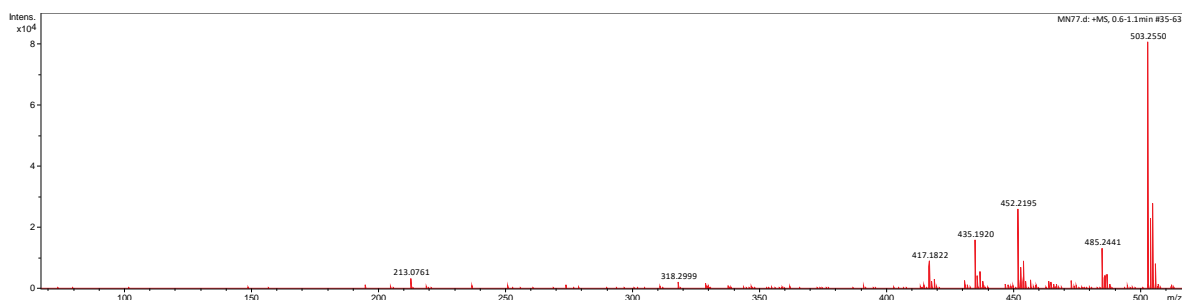

**Figure S43.** HRMS spectrum of 2 $\alpha$ ,3 $\alpha$ -dihydroxy-5 $\alpha$ -cholan-6-oxo-23,24-dinor-22-yl 4-chlorobenzoate (**19**).

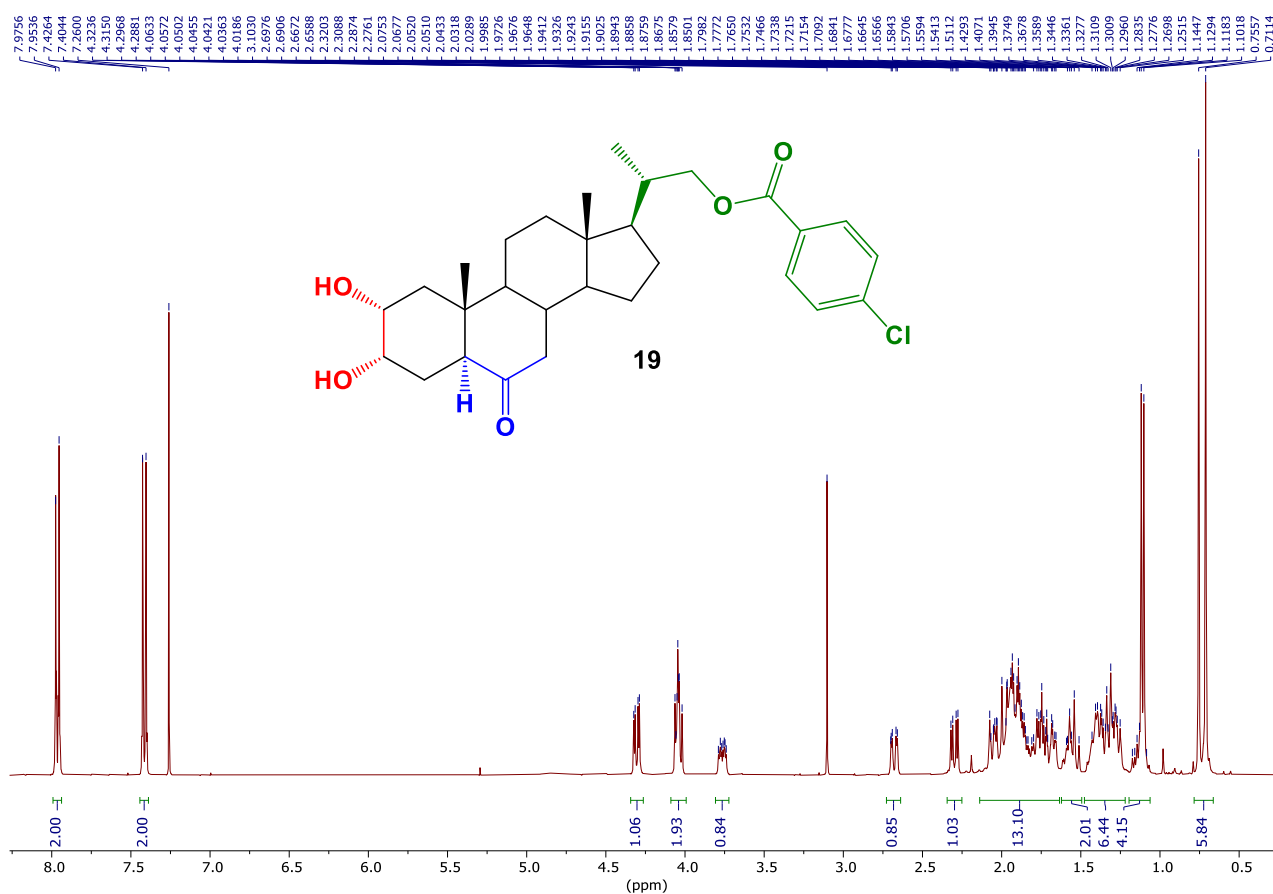

**Figure S44.**  $^1\text{H}$  NMR spectrum of 2 $\alpha$ ,3 $\alpha$ -dihydroxy-5 $\alpha$ -cholan-6-oxo-23,24-dinor-22-yl 4-chlorobenzoate (**19**).

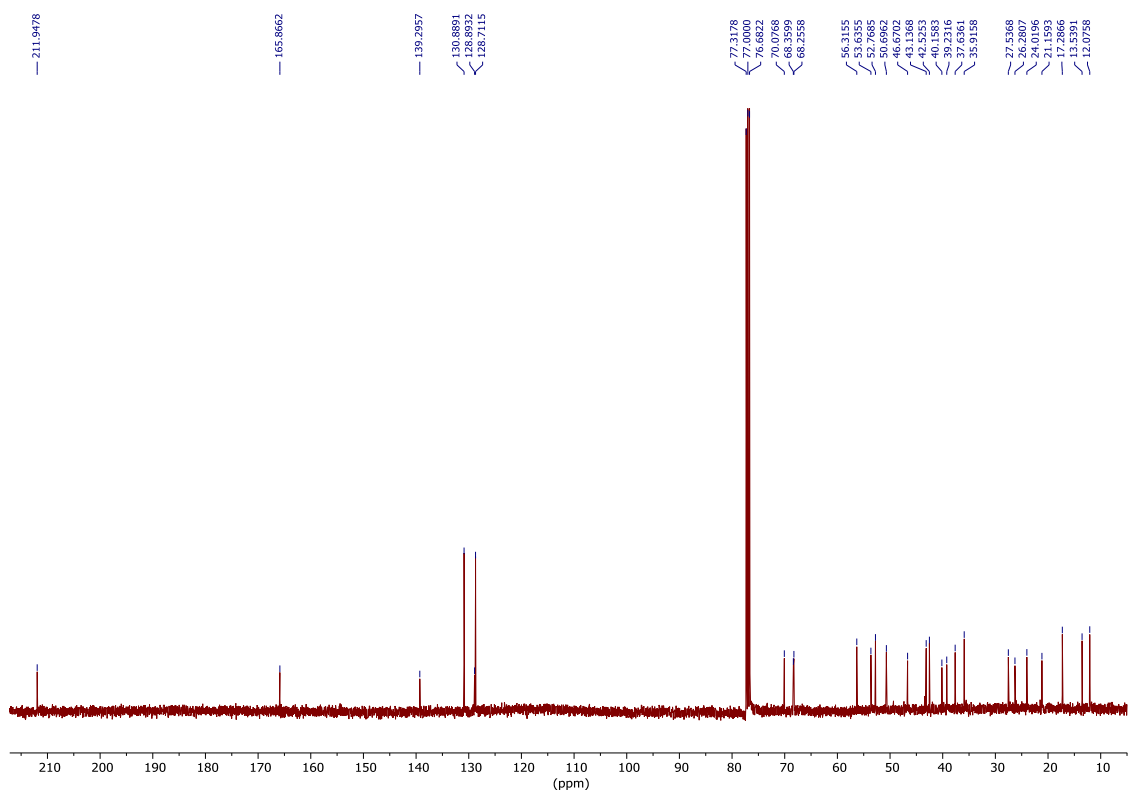

**Figure S45.**  $^{13}\text{C}$  NMR spectrum of 2 $\alpha$ ,3 $\alpha$ -dihydroxy-5 $\alpha$ -cholan-6-oxo-23,24-dinor-22-yl 4-chlorobenzoate (**19**).

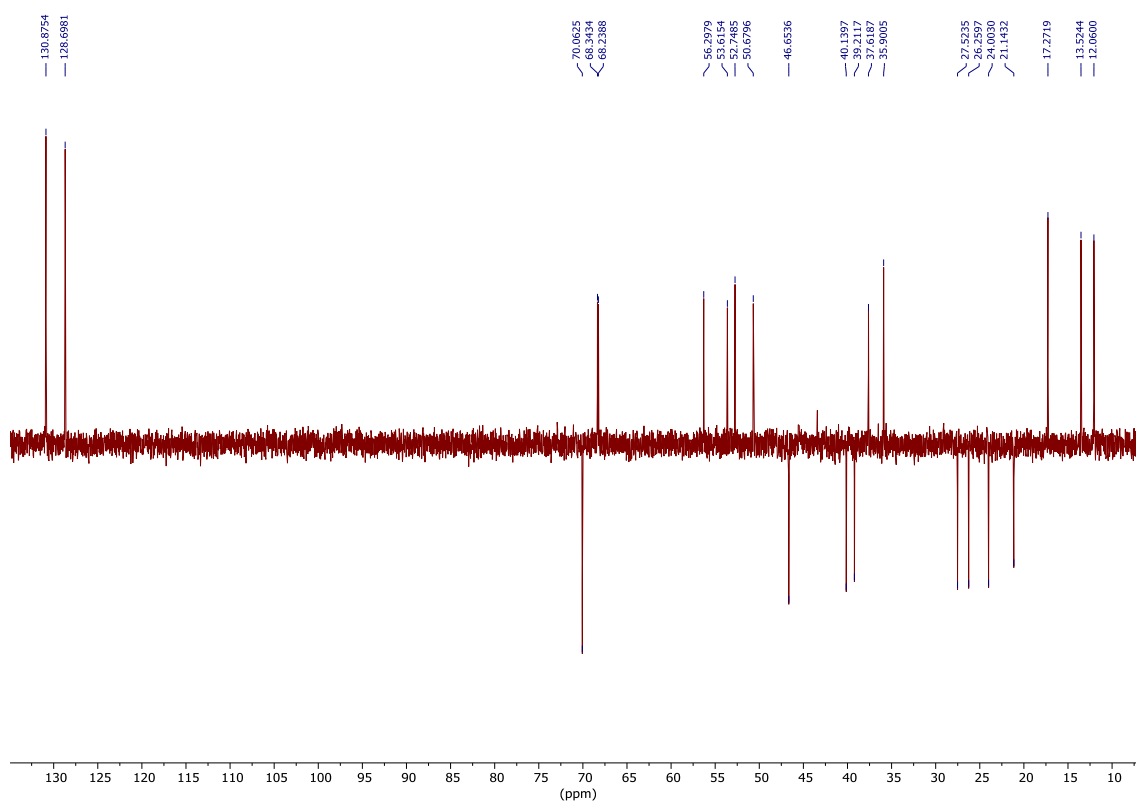

**Figure S46.**  $^{13}\text{C}$ -DEPT 135 NMR spectrum of 2 $\alpha$ ,3 $\alpha$ -dihydroxy-5 $\alpha$ -cholan-6-oxo-23,24-dinor-22-yl 4-chlorobenzoate (**19**).

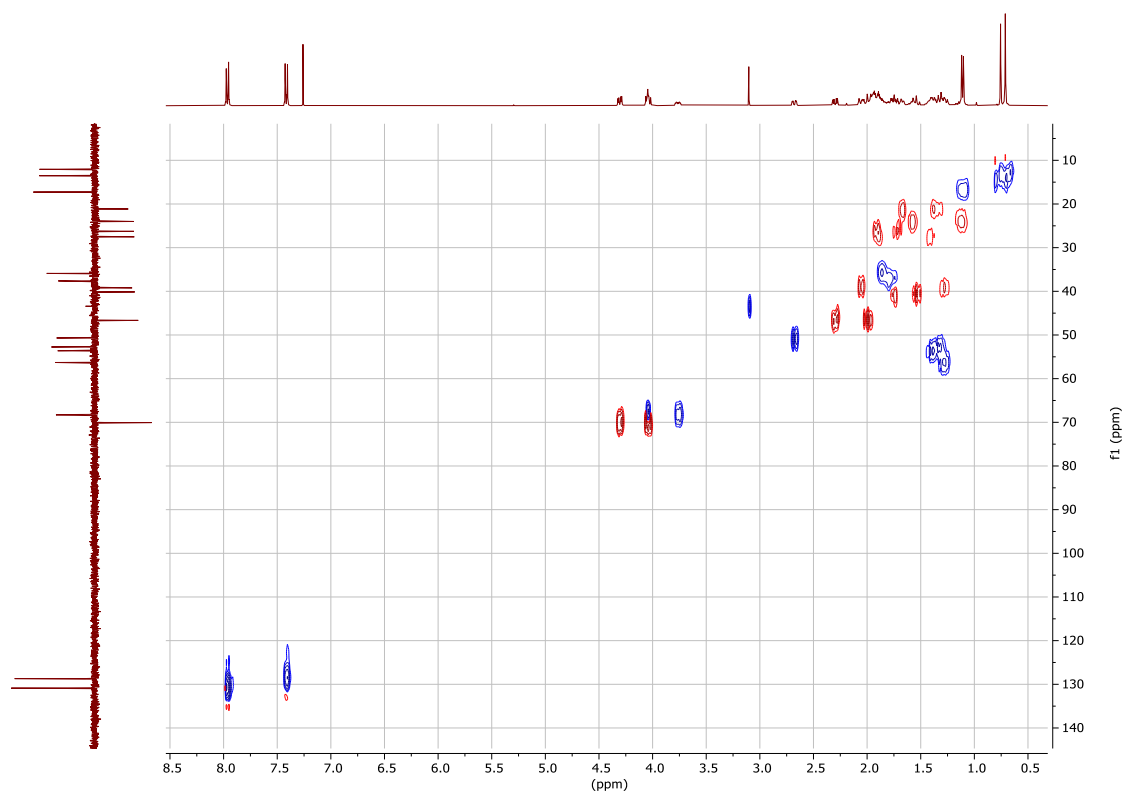

**Figure S47.**  $^1\text{H}$ - $^{13}\text{C}$  HSQC-ed. spectrum  $2\alpha,3\alpha$ -dihydroxy- $5\alpha$ -cholan-6-oxo- $23,24$ -dior- $22$ -yl 4-chlorobenzoate (**19**).

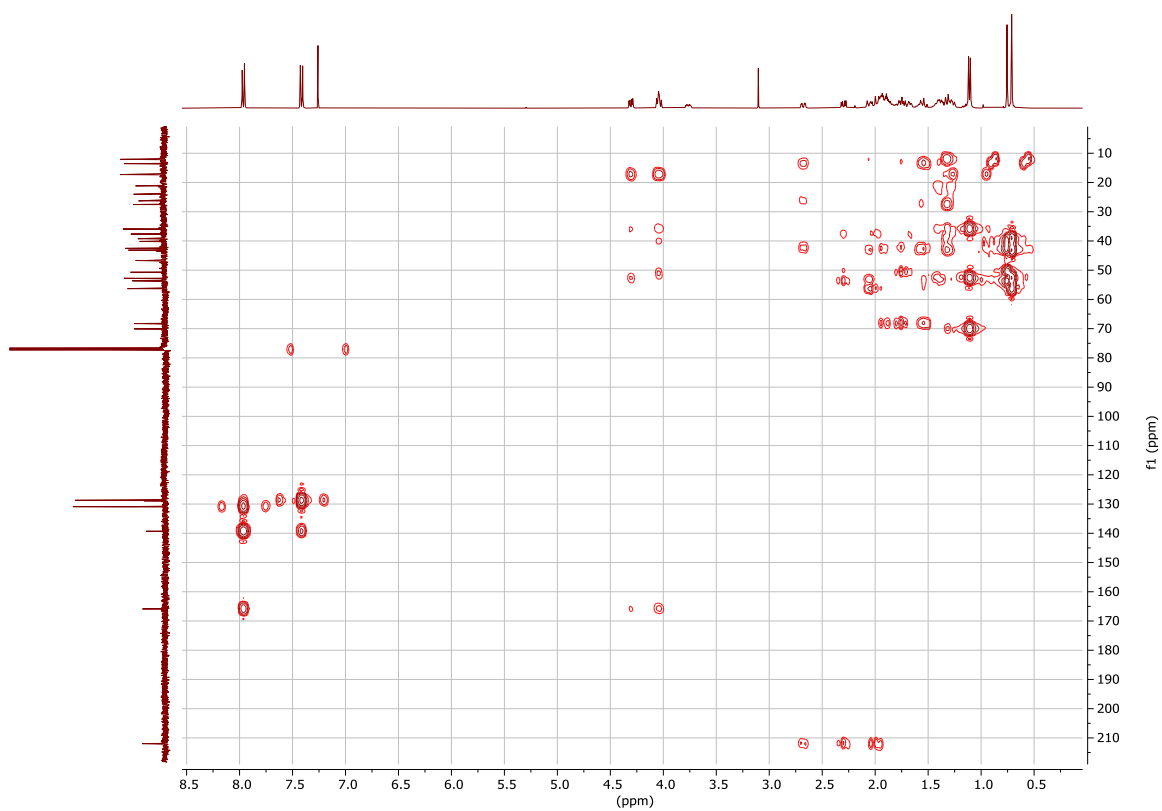

**Figure S48.**  $^1\text{H}$ - $^{13}\text{C}$  HMBC spectrum of  $2\alpha,3\alpha$ -dihydroxy- $5\alpha$ -cholan-6-oxo- $23,24$ -dior- $22$ -yl 4-chlorobenzoate (**19**).

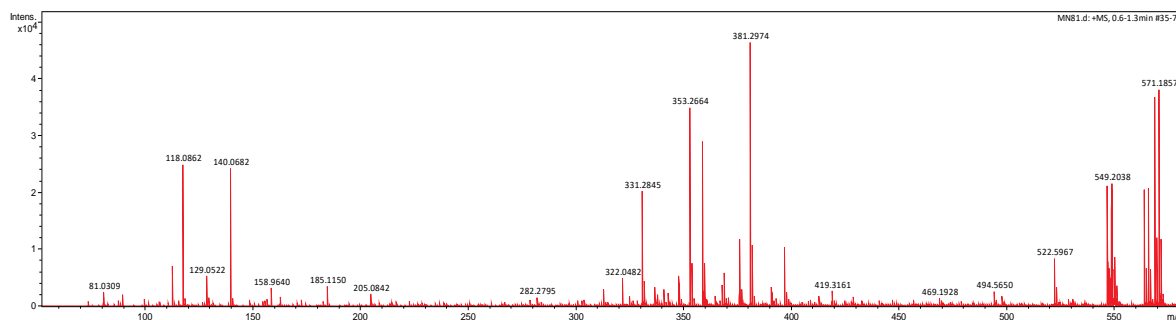

**Figure S49.** HRMS spectrum of 2 $\alpha$ ,3 $\alpha$ -dihydroxy-5 $\alpha$ -cholan-6-oxo-23,24-dinor-22-yl 4-bromobenzoate (**20**).

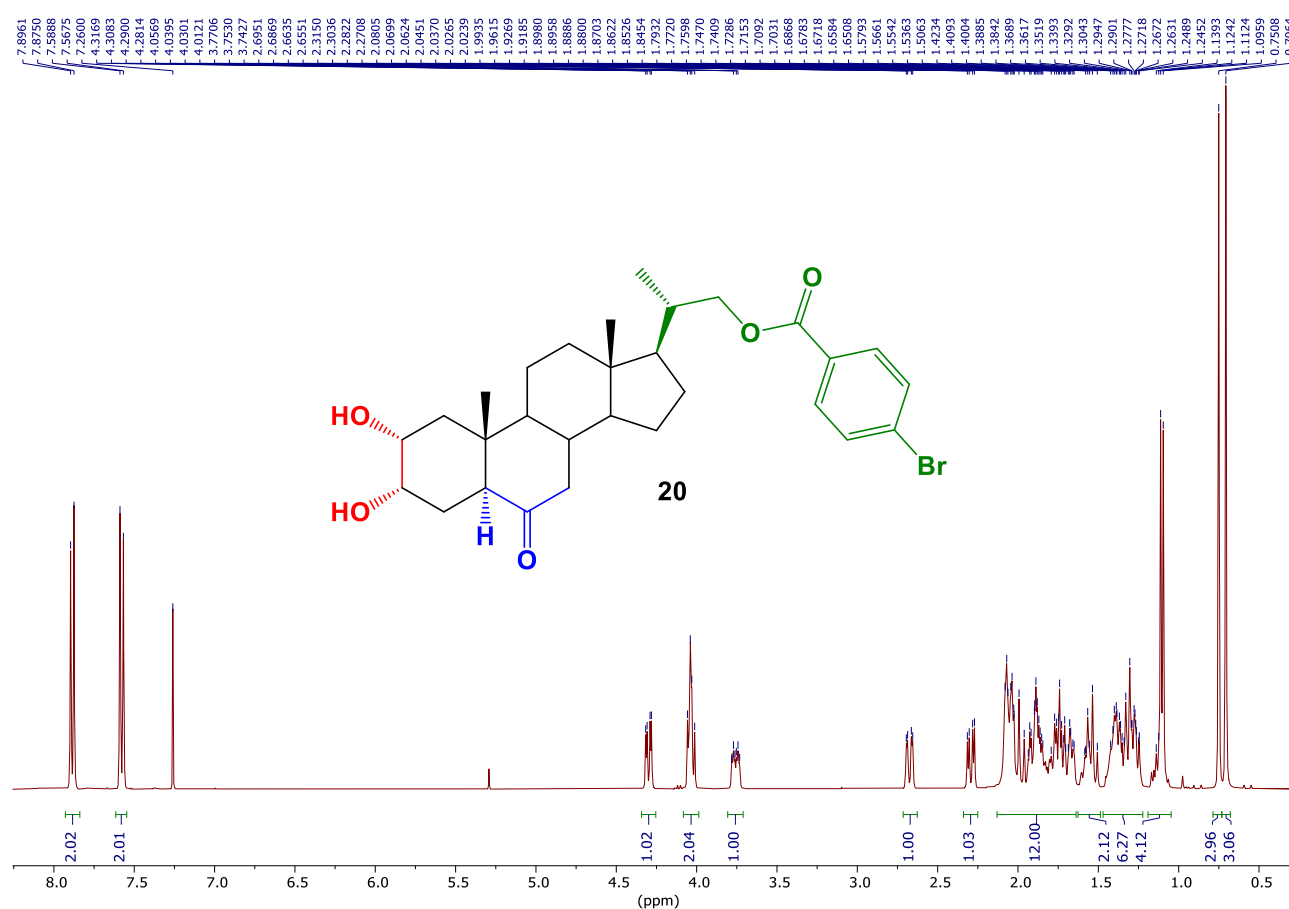

**Figure S50.** <sup>1</sup>H NMR spectrum of 2 $\alpha$ ,3 $\alpha$ -dihydroxy-5 $\alpha$ -cholan-6-oxo-23,24-dinor-22-yl 4-bromobenzoate (**20**).

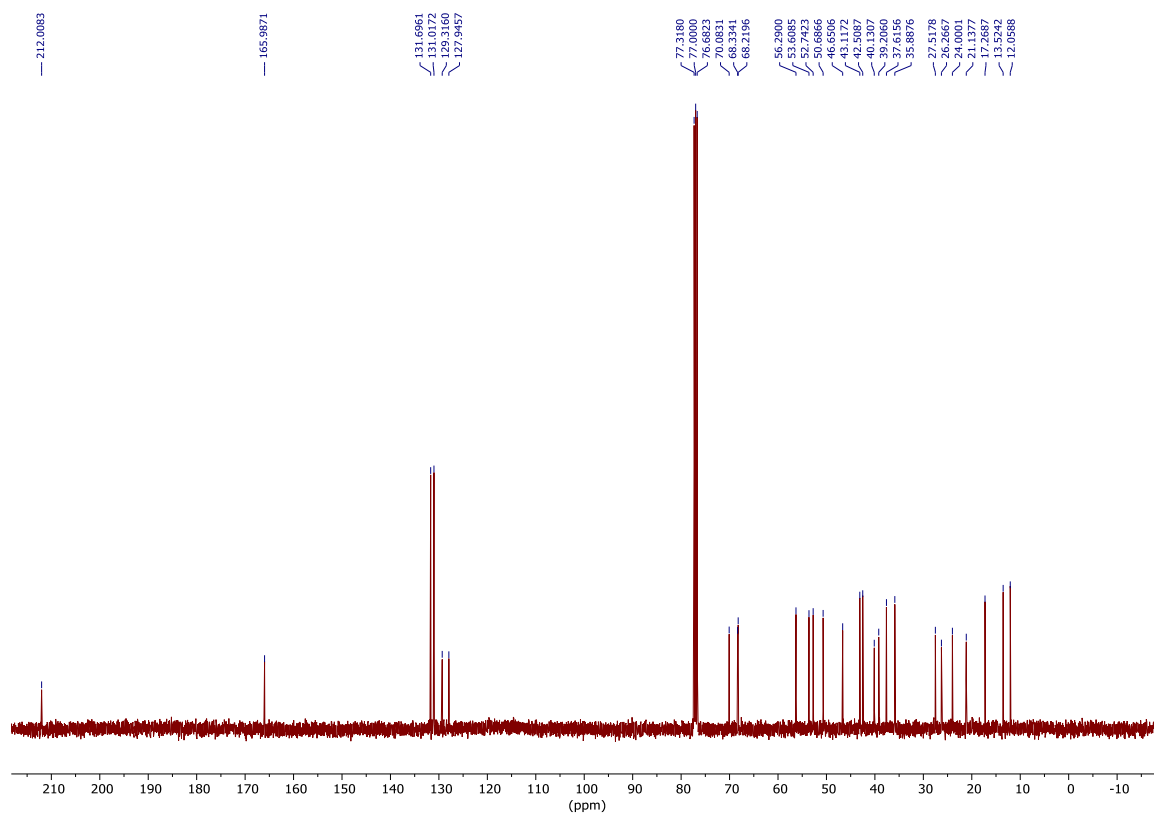

**Figure S51.**  $^{13}\text{C}$  NMR spectrum of 2 $\alpha$ ,3 $\alpha$ -dihydroxy-5 $\alpha$ -cholan-6-oxo-23,24-dinor-22-yl 4-bromobenzoate (**20**).

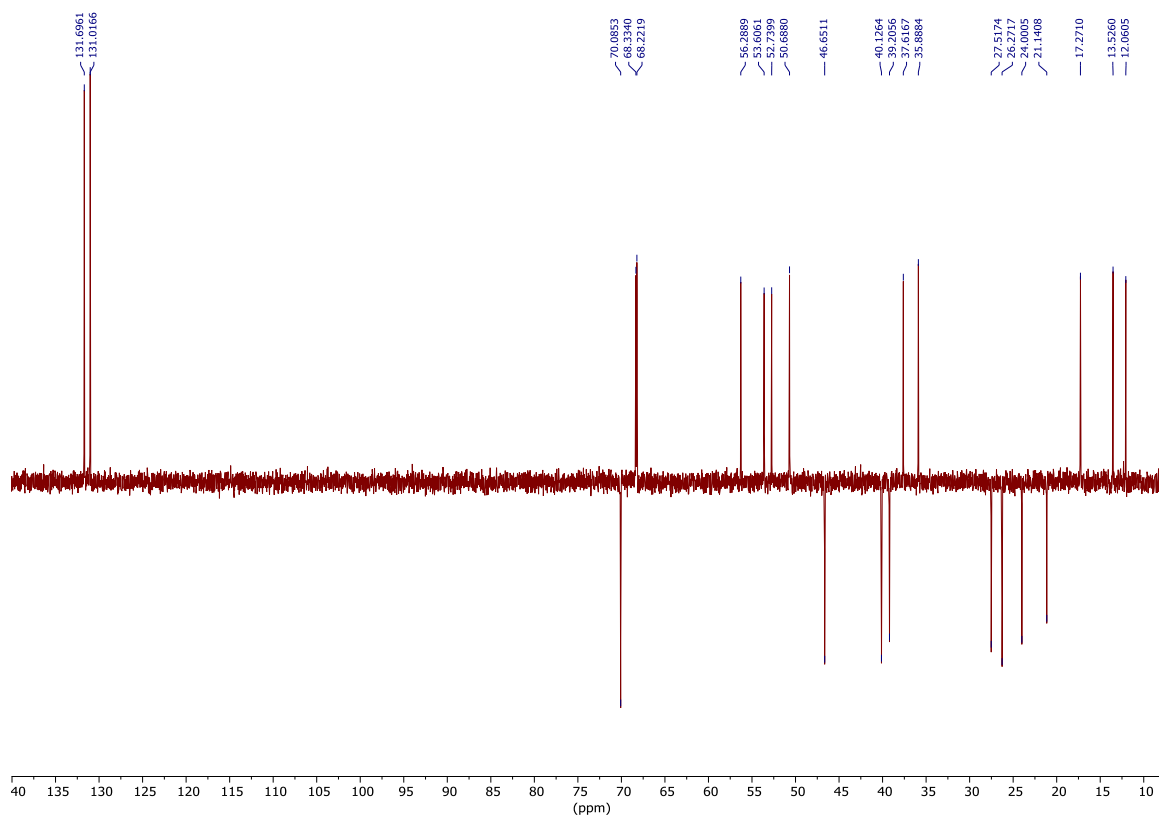

**Figure S52.**  $^{13}\text{C}$ -DEPT 135 NMR spectrum of 2 $\alpha$ ,3 $\alpha$ -dihydroxy-5 $\alpha$ -cholan-6-oxo-23,24-dinor-22-yl 4-bromobenzoate (**20**).

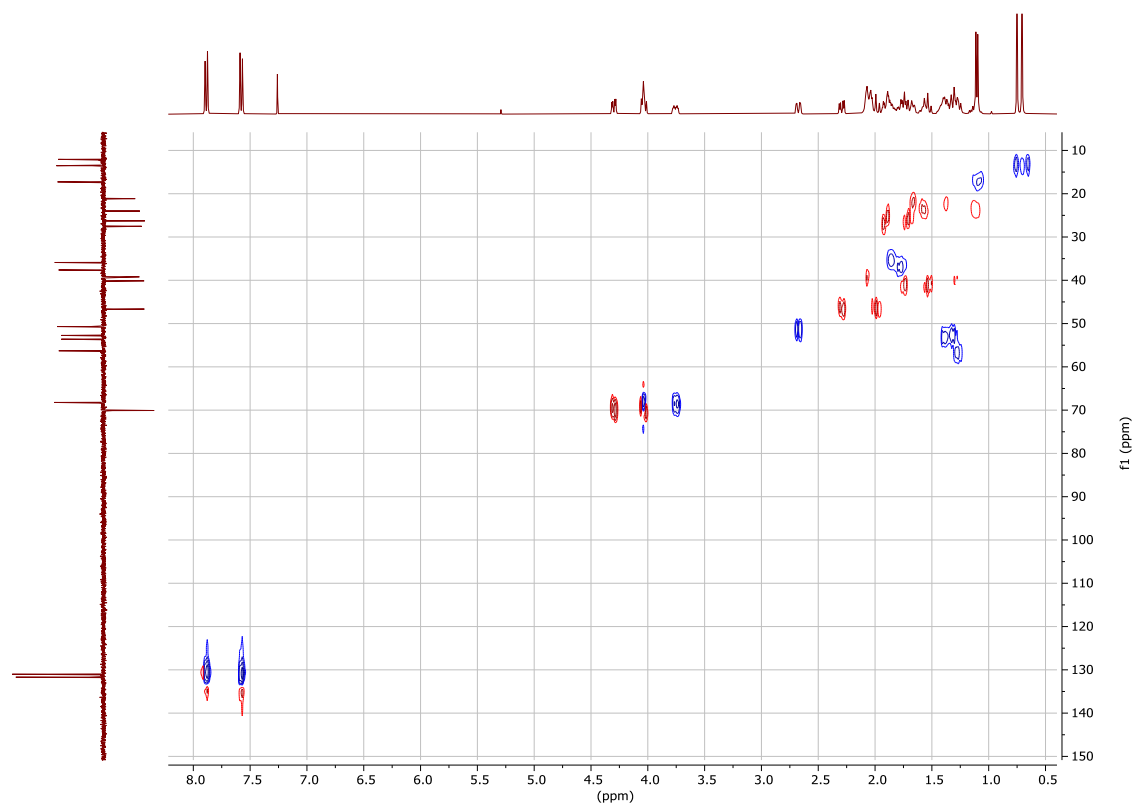

**Figure S53.**  $^1\text{H}$ - $^{13}\text{C}$  HSQC-ed. spectrum  $2\alpha,3\alpha$ -dihydroxy- $5\alpha$ -cholan-6-oxo- $23,24$ -dior- $22$ -yl 4-bromobenzoate (**20**).

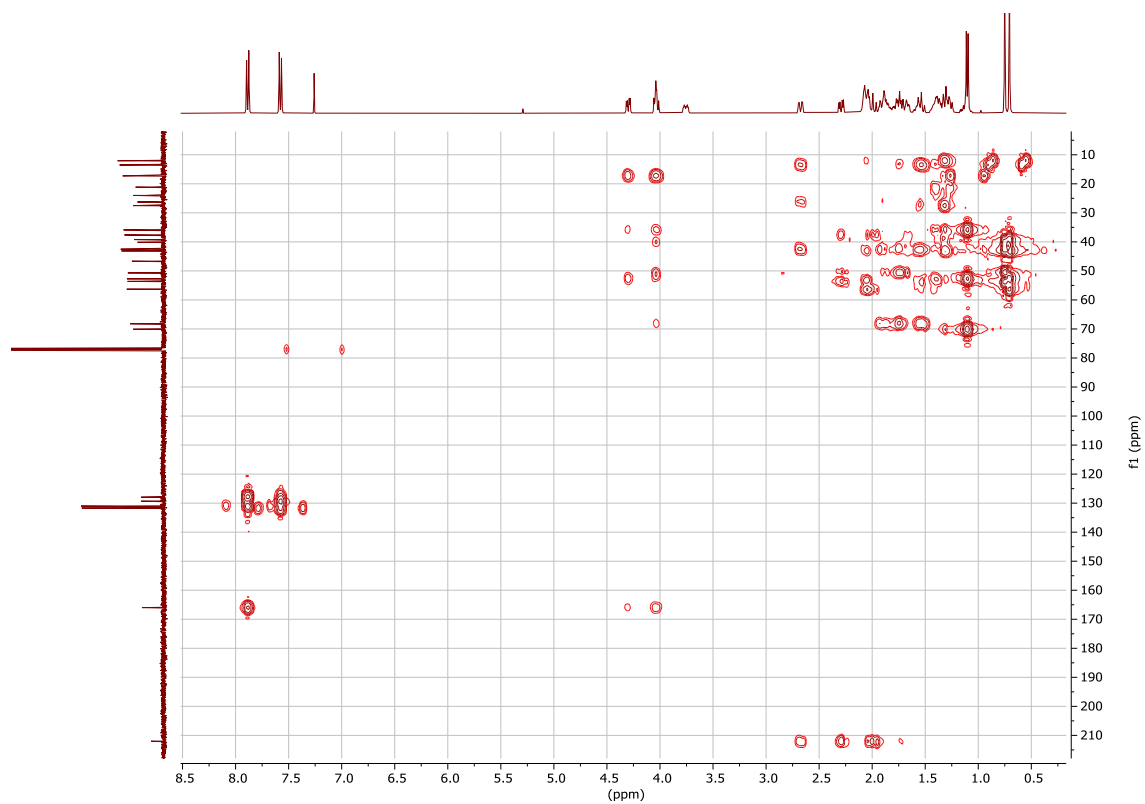

**Figure S54.**  $^1\text{H}$ - $^{13}\text{C}$  HMBC spectrum of  $2\alpha,3\alpha$ -dihydroxy- $5\alpha$ -cholan-6-oxo- $23,24$ -dior- $22$ -yl 4-bromobenzoate (**20**).

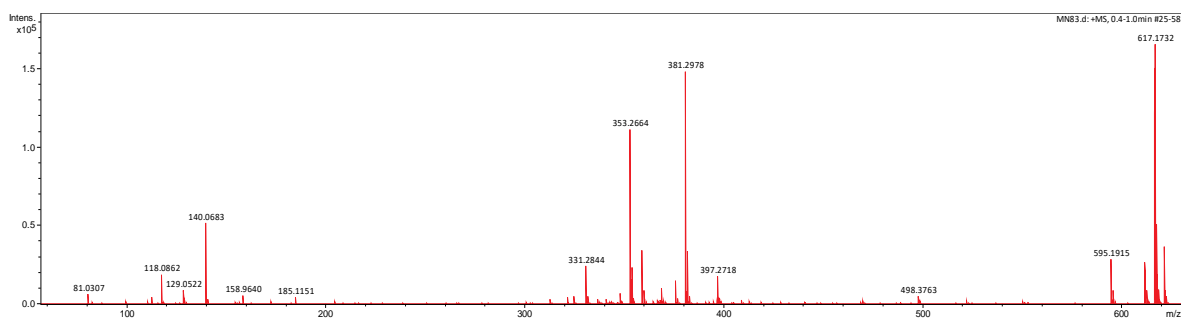

**Figure S55.** HRMS spectrum of 2 $\alpha$ ,3 $\alpha$ -dihydroxy-5 $\alpha$ -cholan-6-oxo-23,24-dinor-22-yl 4-iodobenzoate (**21**).

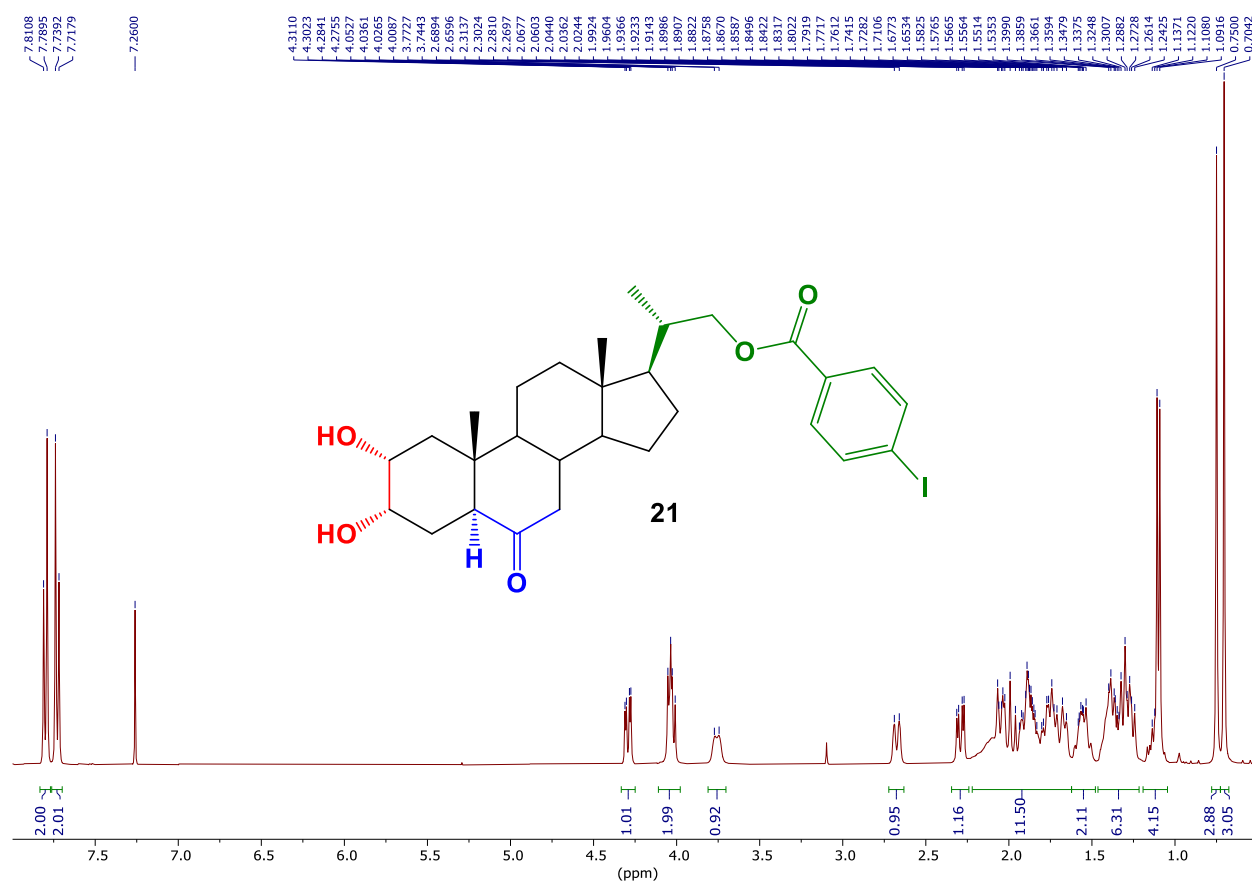

**Figure S56.**  $^1\text{H}$  NMR spectrum of 2 $\alpha$ ,3 $\alpha$ -dihydroxy-5 $\alpha$ -cholan-6-oxo-23,24-dinor-22-yl 4-iodobenzoate (**21**).

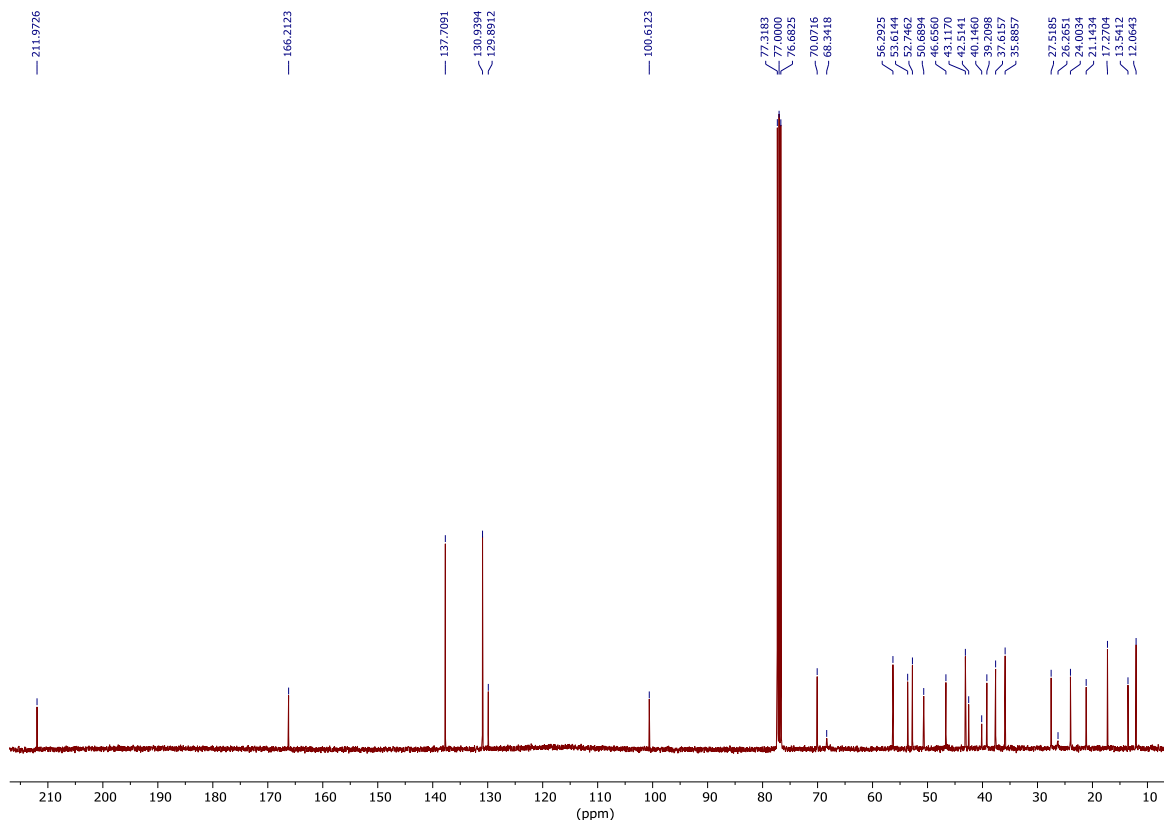

**Figure S57.**  $^{13}\text{C}$  NMR spectrum of 2 $\alpha$ ,3 $\alpha$ -dihydroxy-5 $\alpha$ -cholan-6-oxo-23,24-dinor-22-yl 4-iodobenzoate (**21**).

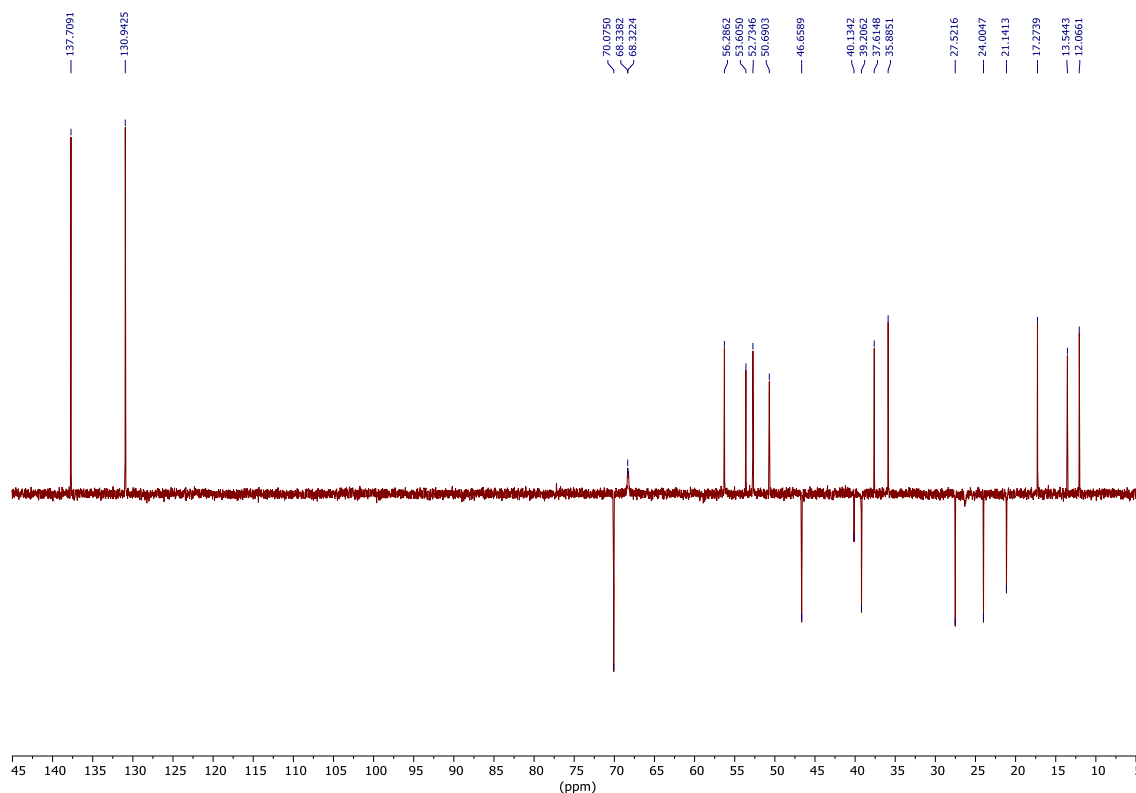

**Figure S58.**  $^{13}\text{C}$ -DEPT 135 NMR spectrum of 2 $\alpha$ ,3 $\alpha$ -dihydroxy-5 $\alpha$ -cholan-6-oxo-23,24-dinor-22-yl 4-iodobenzoate (**21**).

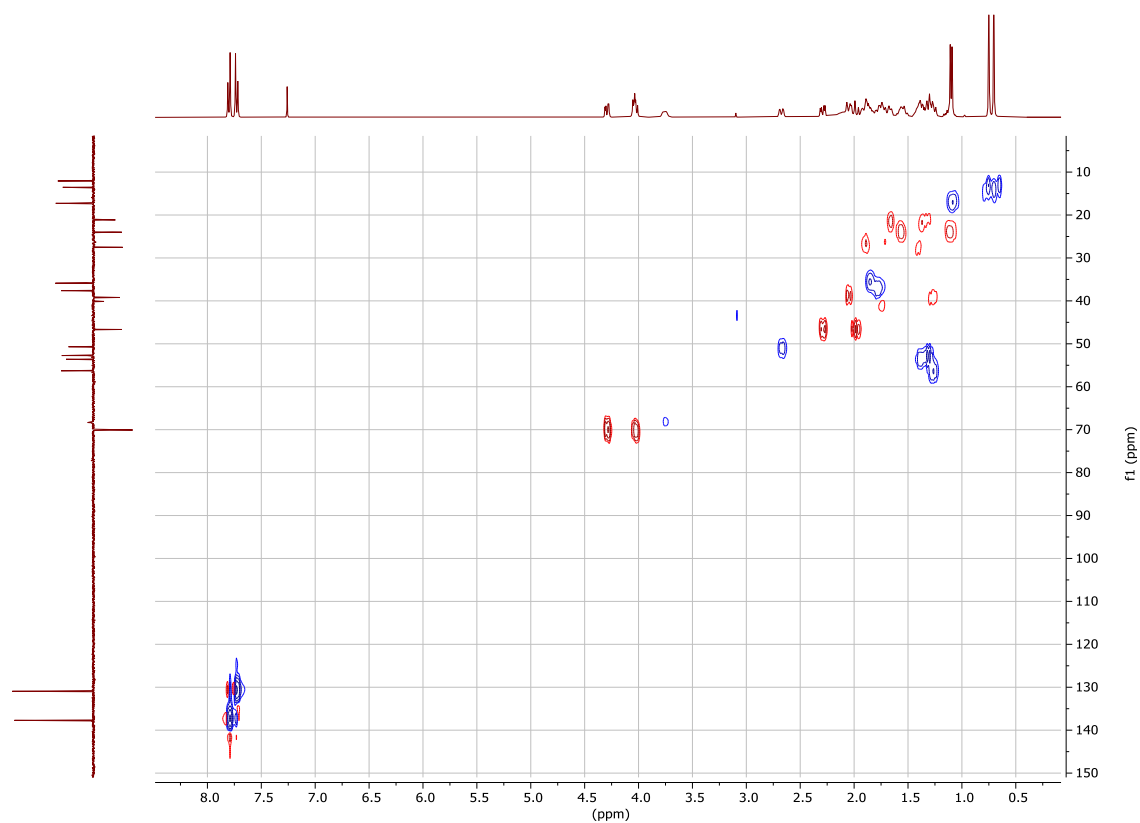

**Figure S59.**  $^1\text{H}$ - $^{13}\text{C}$  HSQC-ed. spectrum  $2\alpha,3\alpha$ -dihydroxy- $5\alpha$ -cholan-6-oxo- $23,24$ -dior- $22$ -yl 4-iodobenzoate (**21**).

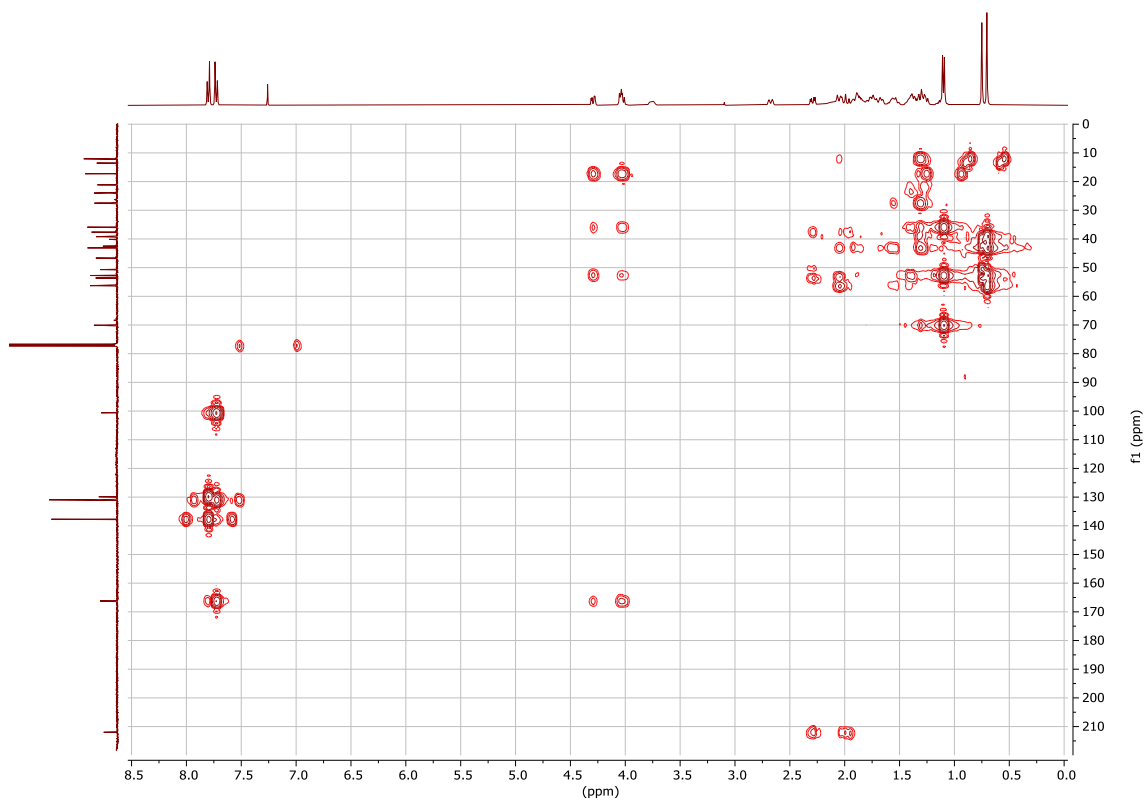

**Figure S60.**  $^1\text{H}$ - $^{13}\text{C}$  HMBC spectrum of  $2\alpha,3\alpha$ -dihydroxy- $5\alpha$ -cholan-6-oxo- $23,24$ -dior- $22$ -yl 4-iodobenzoate (**21**).

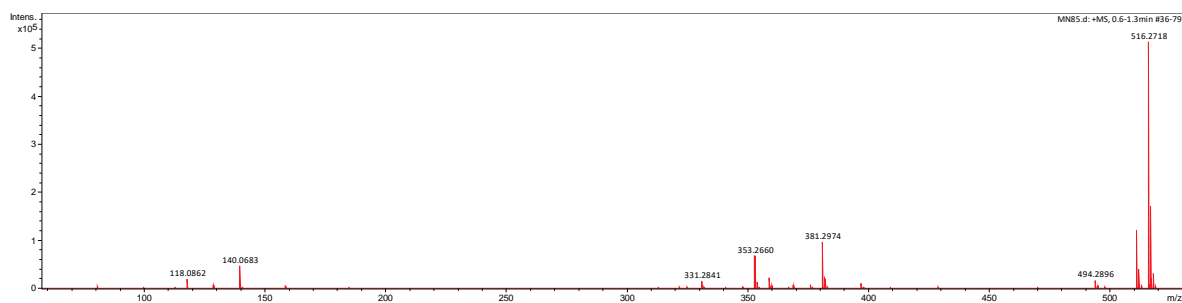

**Figure S61.** HRMS spectrum of 2 $\alpha$ ,3 $\alpha$ -dihydroxy-5 $\alpha$ -cholan-6-oxo-23,24-dinor-22-yl 4-cyanobenzoate (**22**).

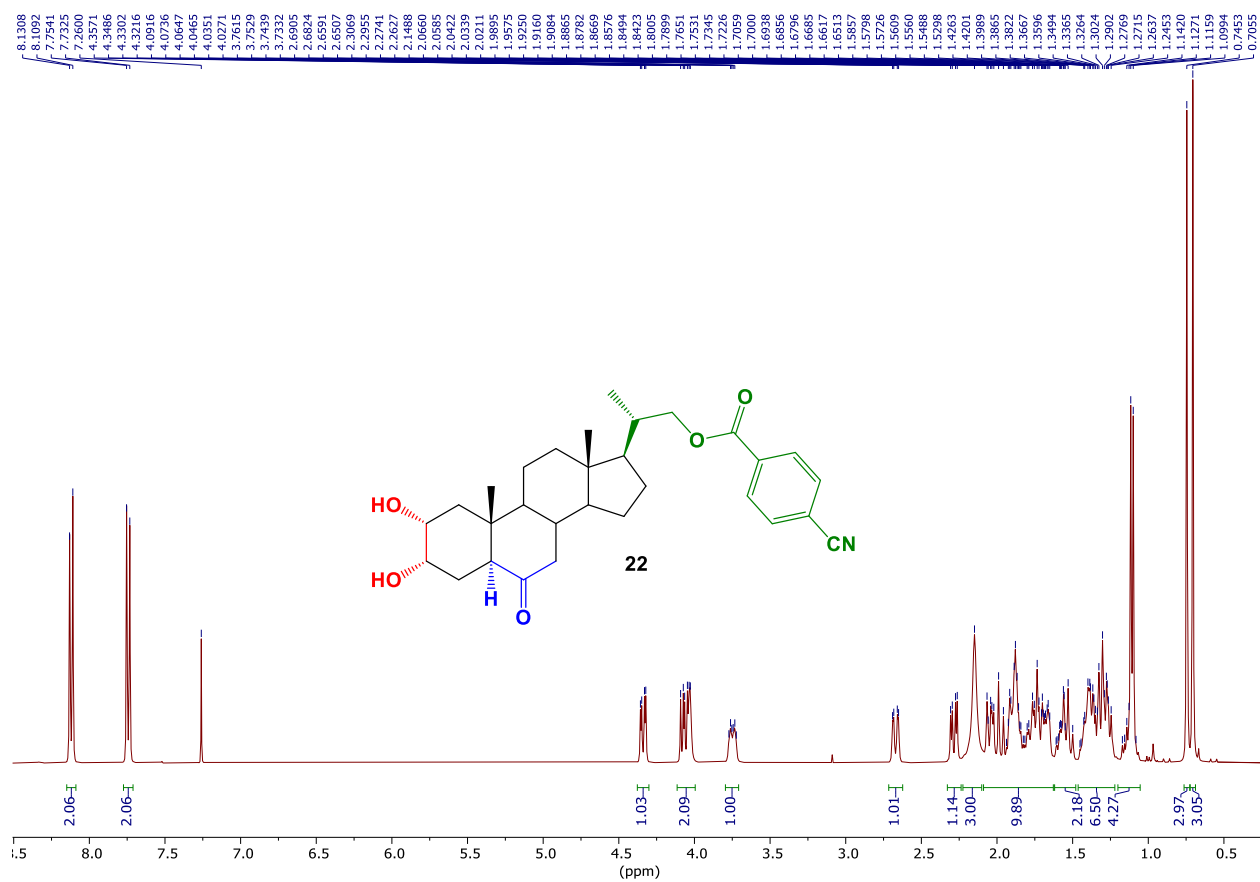

**Figure S62.**  $^1\text{H}$  NMR spectrum of 2 $\alpha$ ,3 $\alpha$ -dihydroxy-5 $\alpha$ -cholan-6-oxo-23,24-dinor-22-yl 4-cyanobenzoate (**22**).

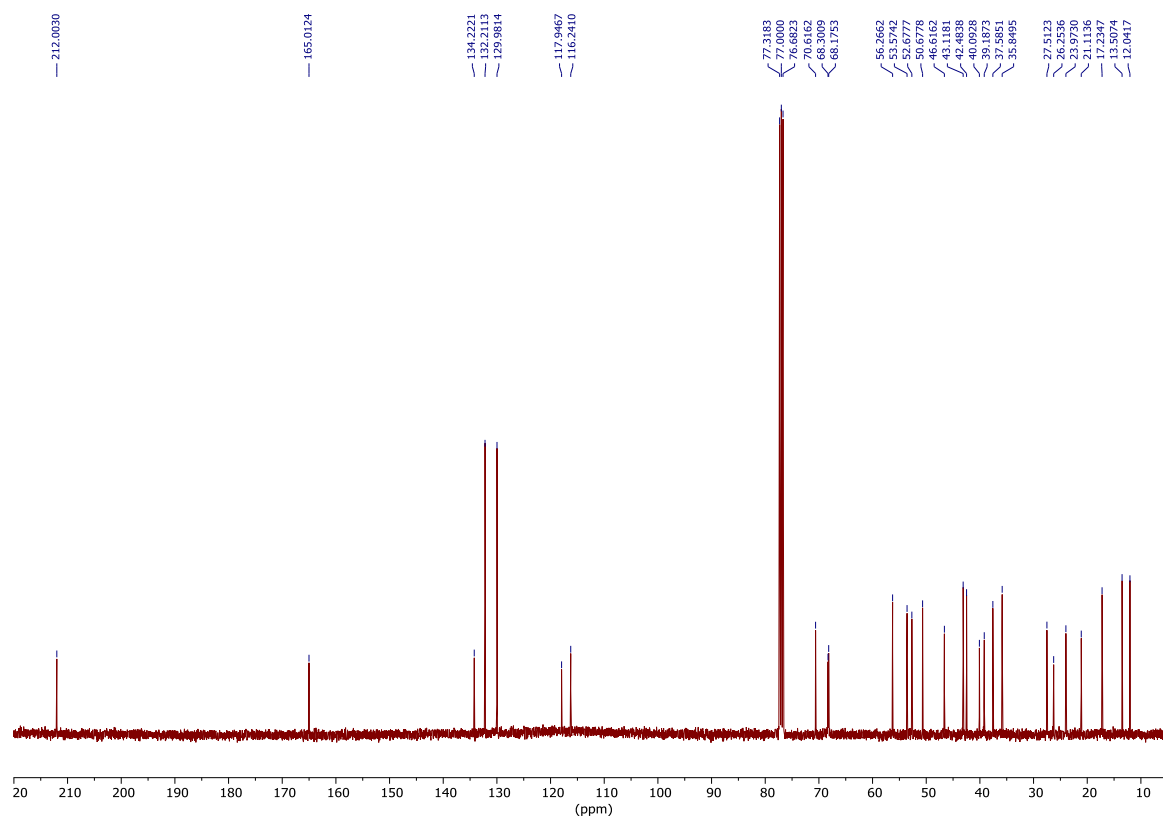

**Figure S63.**  $^{13}\text{C}$  NMR spectrum of 2 $\alpha$ ,3 $\alpha$ -dihydroxy-5 $\alpha$ -cholan-6-oxo-23,24-dinor-22-yl 4-cyanobenzoate (**22**).

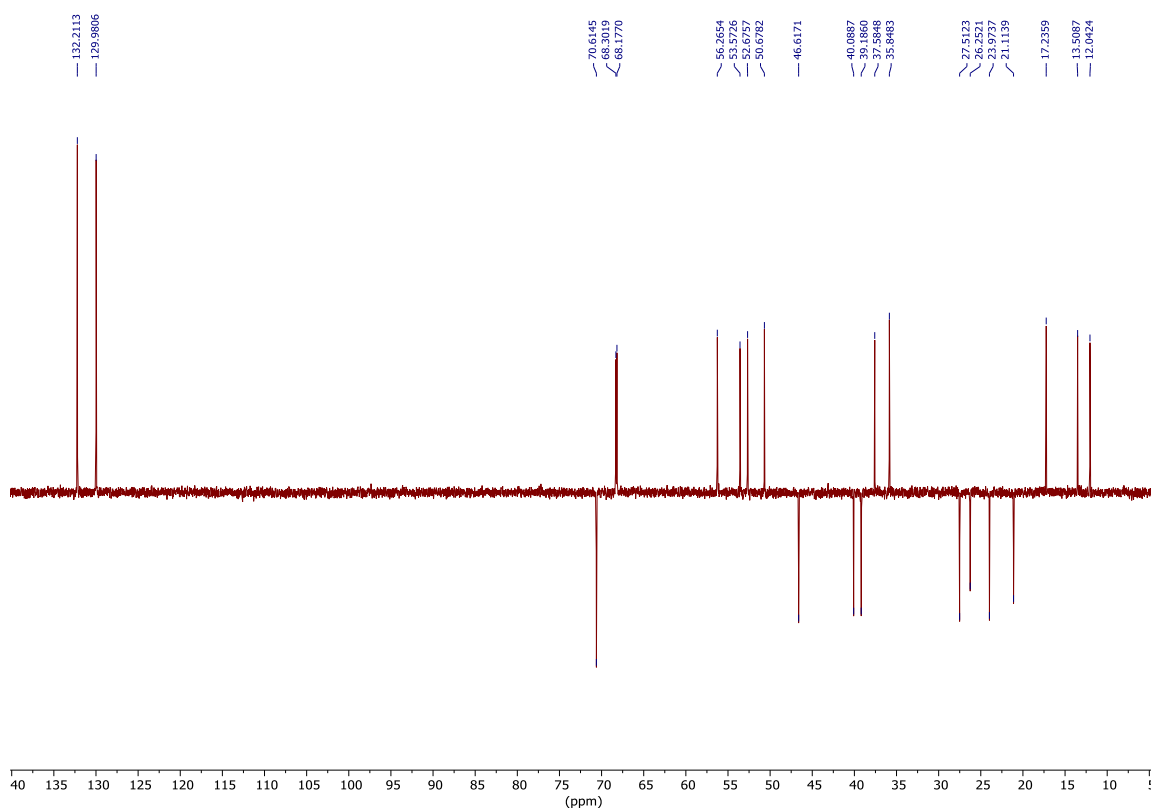

**Figure S64.**  $^{13}\text{C}$ -DEPT 135 NMR spectrum of 2 $\alpha$ ,3 $\alpha$ -dihydroxy-5 $\alpha$ -cholan-6-oxo-23,24-dinor-22-yl 4-cyanobenzoate (**22**).

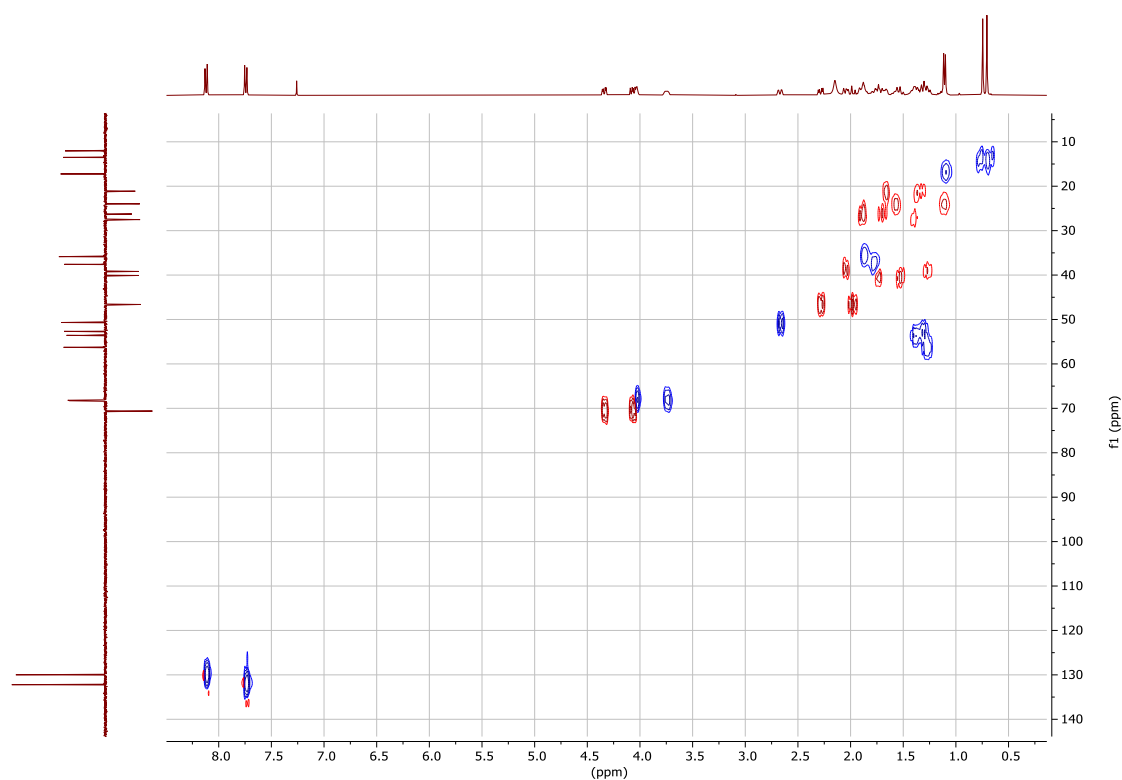

**Figure S65.**  $^1\text{H}$ - $^{13}\text{C}$  HSQC-ed. spectrum  $2\alpha,3\alpha$ -dihydroxy- $5\alpha$ -cholan-6-oxo- $23,24$ -dior- $22$ -yl 4-cyanobenzoate (**22**).

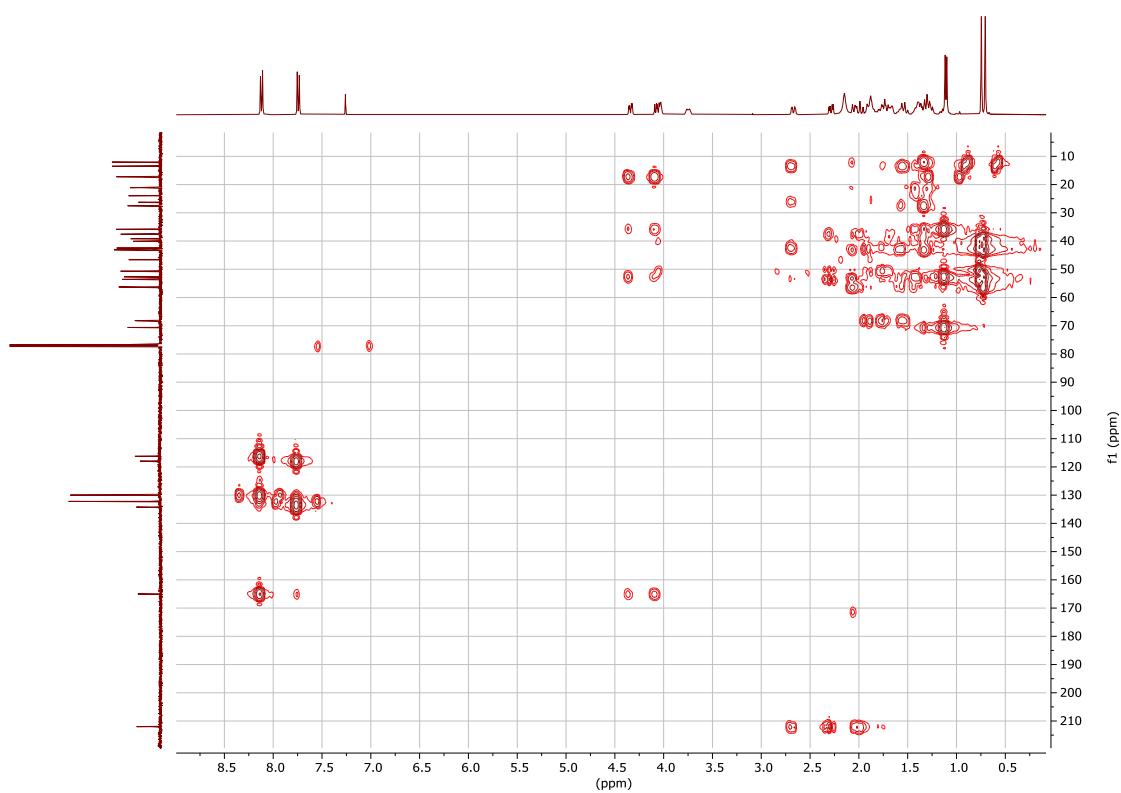

**Figure S66.**  $^1\text{H}$ - $^{13}\text{C}$  HMBC spectrum of  $2\alpha,3\alpha$ -dihydroxy- $5\alpha$ -cholan-6-oxo- $23,24$ -dior- $22$ -yl 4-cyanobenzoate (**22**).

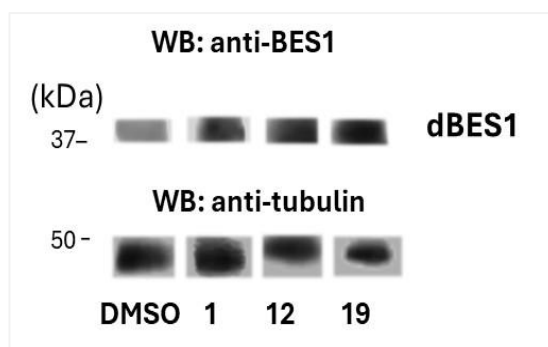

**Figure S67.** Representative Western blot analysis showing dephosphorylation of BES1 after treatment with active compound **12** and **19**. WB: Western blot; dBES1: dominant Brassinosteroid-Insensitive 1 Suppressor 1; DMSO: Dimethyl sulfoxide; kDa: Kilodalton. Representative images are shown. dBES1, dephosphorylated BES1.

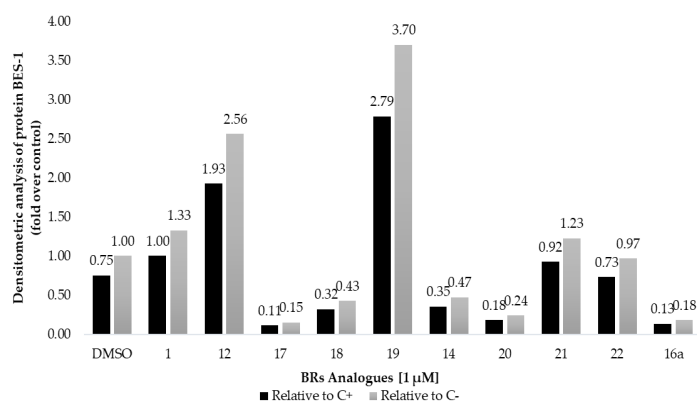

**Figure S68:** BES1 phosphorylation status tested by immunoblot with  $\alpha$ -BES1 antibody in roots of *Arabidopsis thaliana* ecotype Col-0 6-day-old seedlings after analogues of BR treatment. Tubulin detected with  $\alpha$ -tubulin antibody was used as a loading control. The graph shows the percentage of dephosphorylated BES1 relative to total BES1 detected in wild-type *Arabidopsis* ecotype (Col-0) treated with brassinolide (**1**) after 6 days.

a) Compound 12

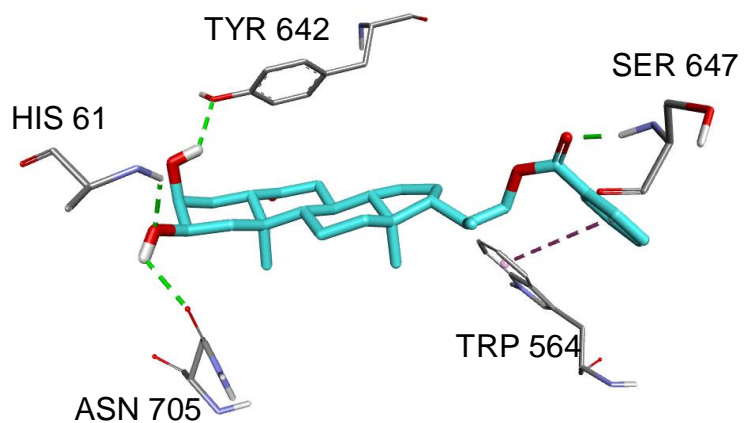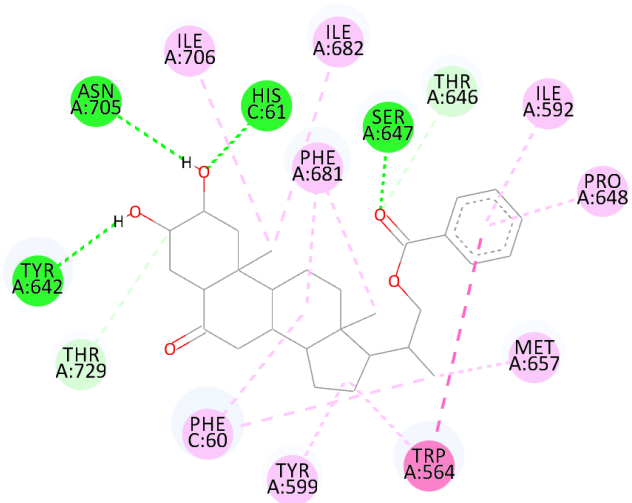

b) Compound 14

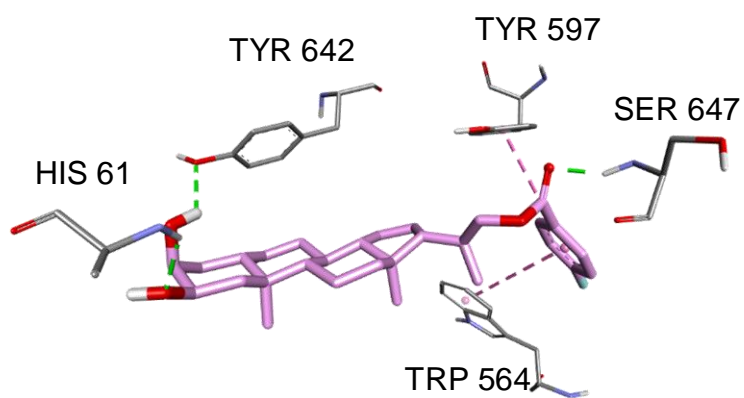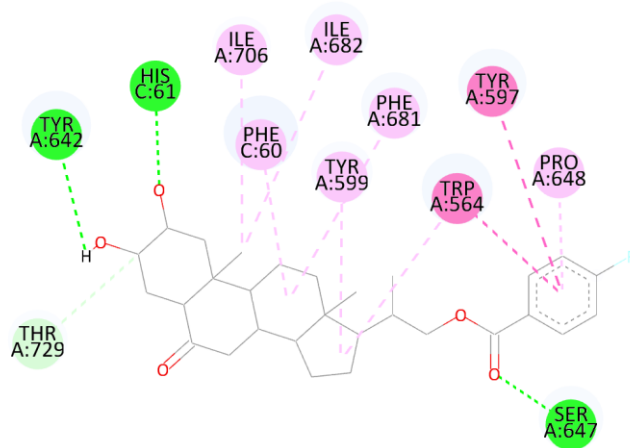

c) Compound 16a

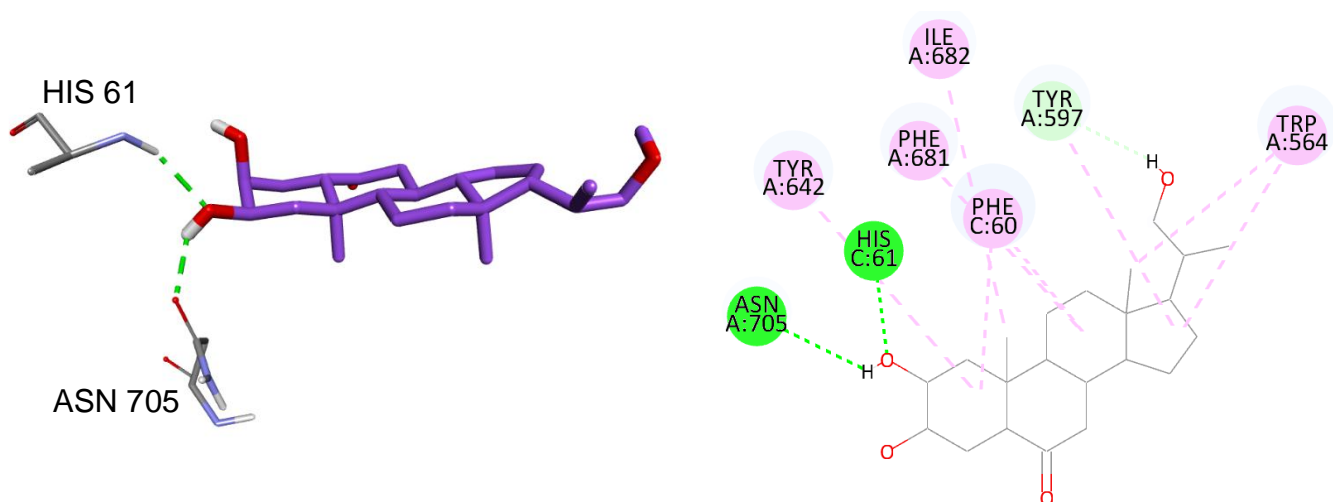

d) Compound 17

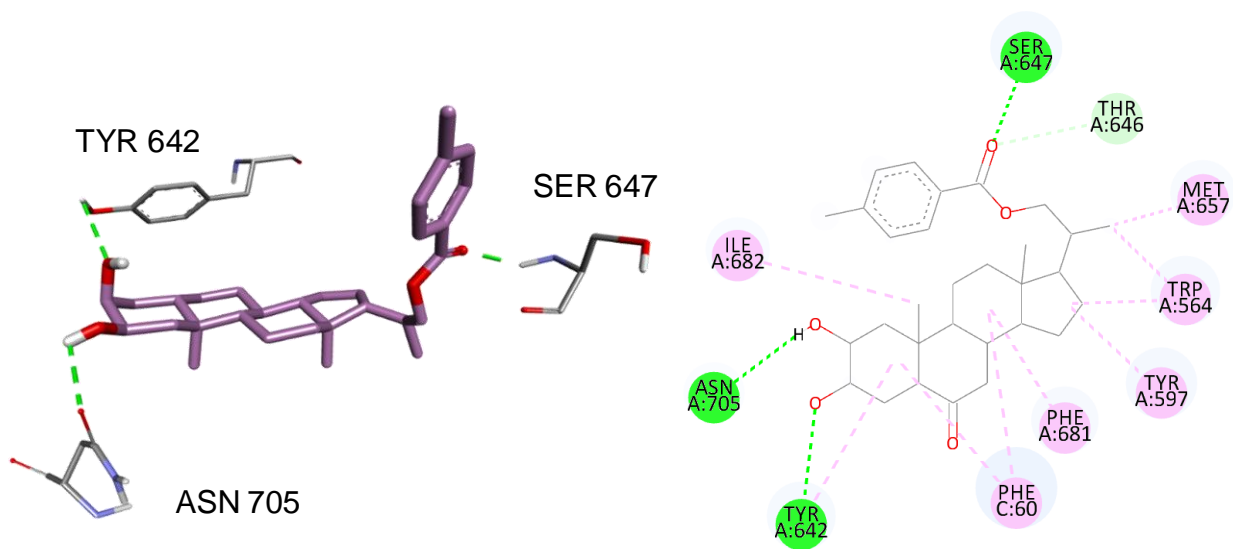

e) Compound 18

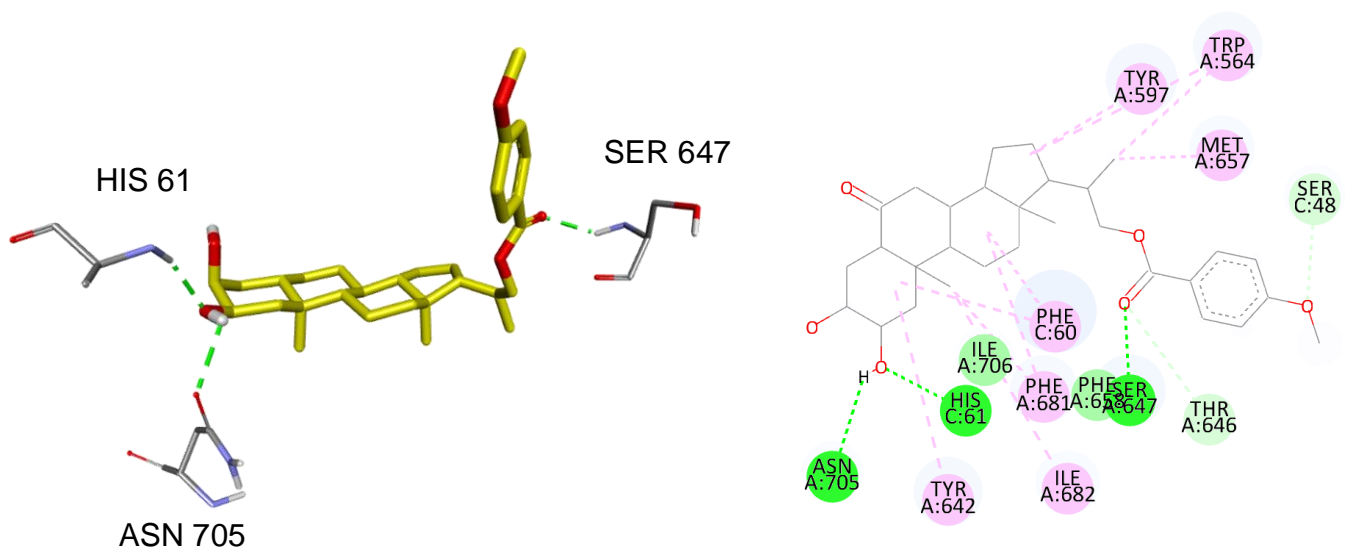

f) Compound 19

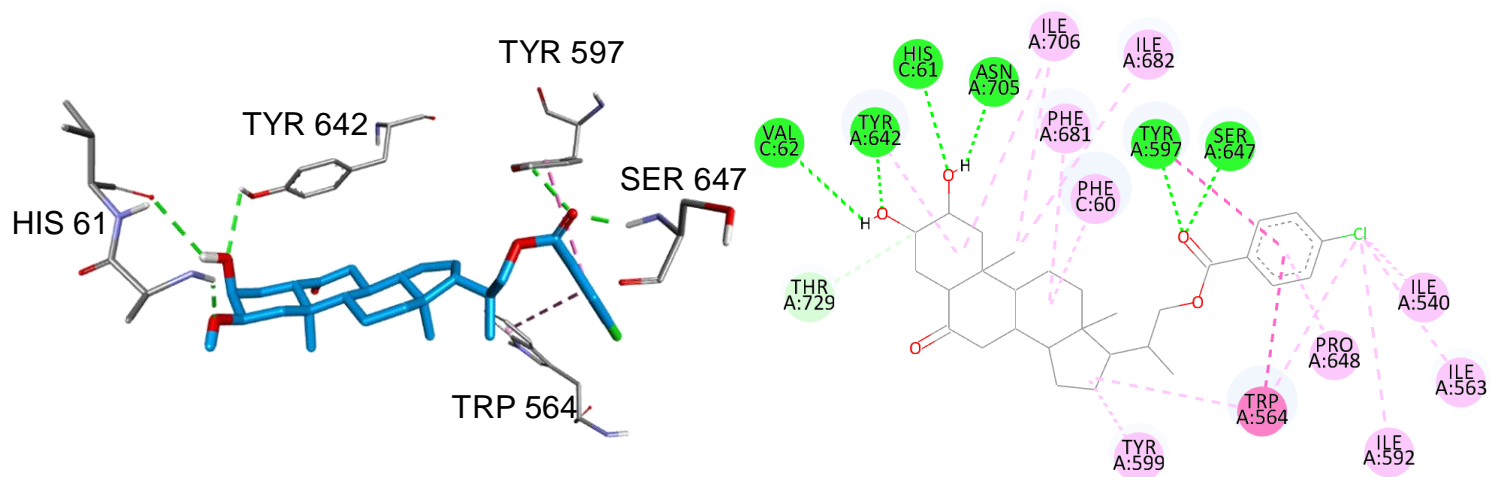

g) Compound 20

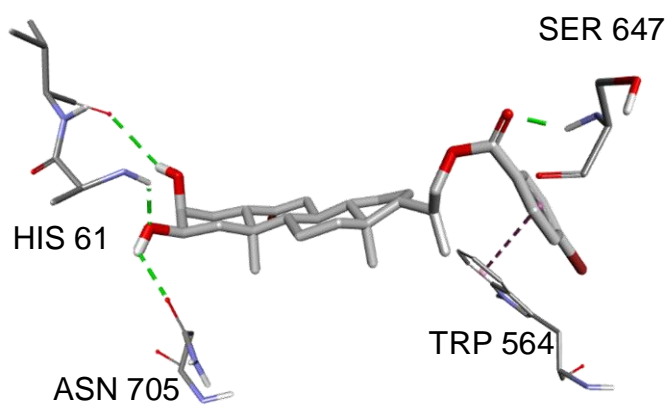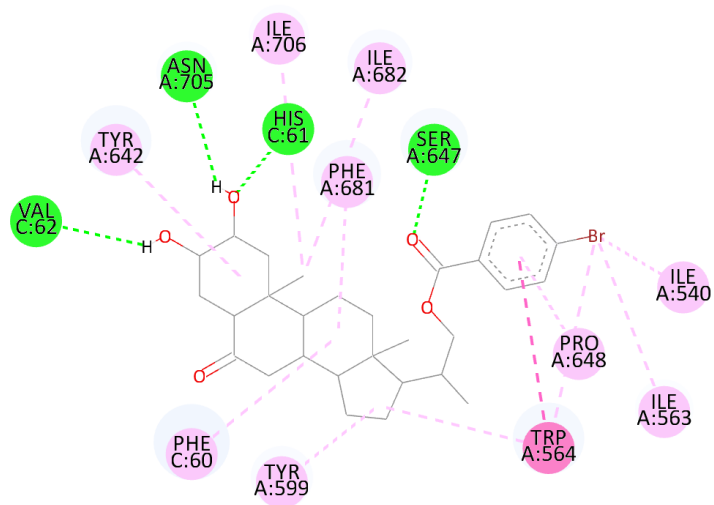

h) Compound 21

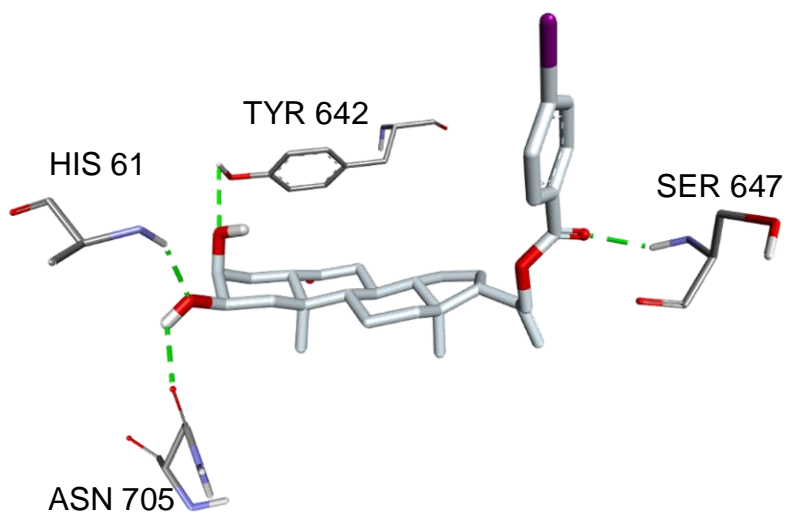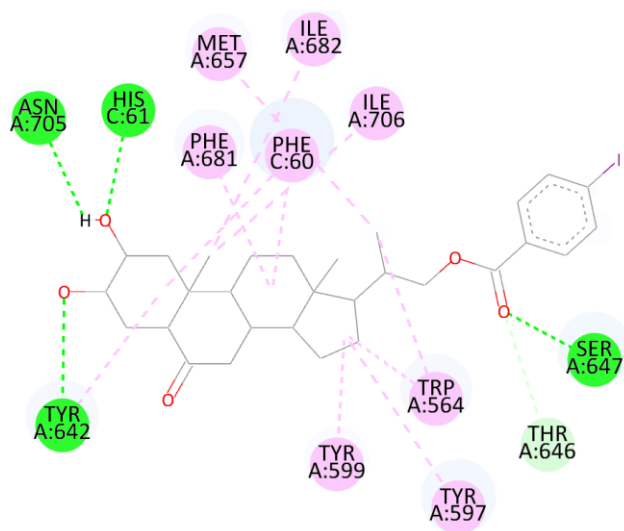

i) Compound **22**

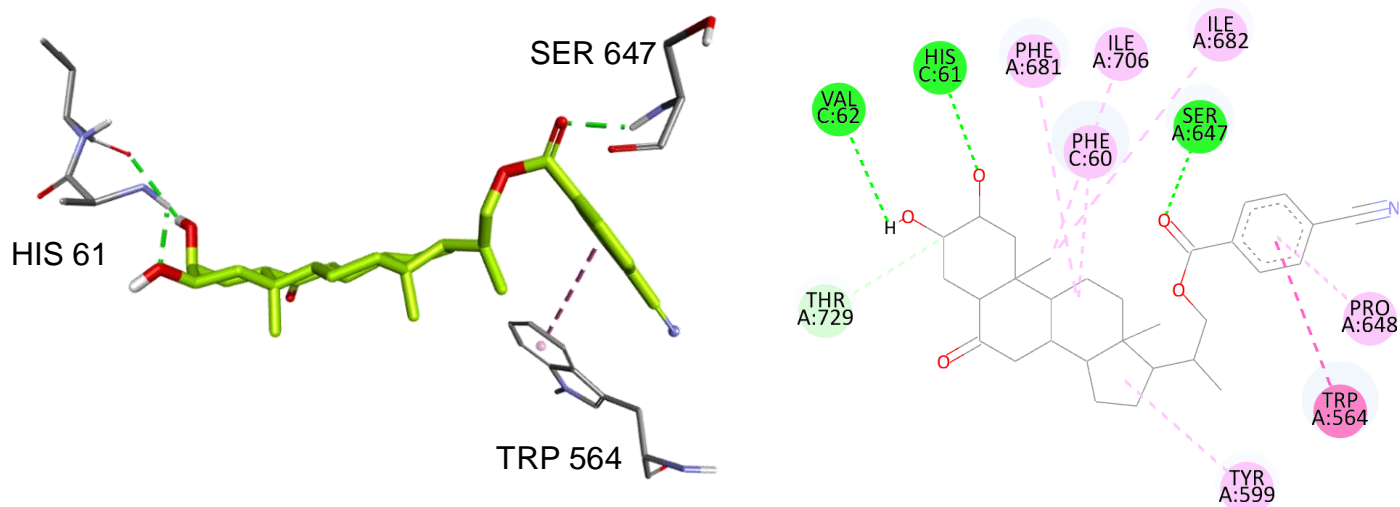

**Figure S69.** Protein–ligand interactions with a) compound **12** b) compound **14**; c) compound **16a**, d) compound **17**, e) compound **18**, f) compound **19**, g) compound **20**, h) compound **21** and i) compound **22**. Hydrogen bonds are represented in green segmented lines.  $\Pi$ – $\pi$  stacking are represented in dark pink segmented lines. Hydrophobic interactions are represented in pink segmented lines. Visualization of the docked poses was performed using Discovery Studio Visualizer (BIOVIA, San Diego, CA, USA).

**Table S1:** Rice lamina assays using the second leaf lamina joints (angle opening, degrees) of excised leaf segments treated with BRs analogs (**1**, **12**, **14** and **17–22**) at different concentrations. Brassinolide was used as positive control at the same concentrations.

| Compounds                                                                                            | RLIT (angle opening, degrees)                                                       |                                                                                      |                                                                                       |
|------------------------------------------------------------------------------------------------------|-------------------------------------------------------------------------------------|--------------------------------------------------------------------------------------|---------------------------------------------------------------------------------------|
|                                                                                                      | $1 \times 10^{-8}$ M                                                                | $1 \times 10^{-7}$ M                                                                 | $1 \times 10^{-6}$ M                                                                  |
| 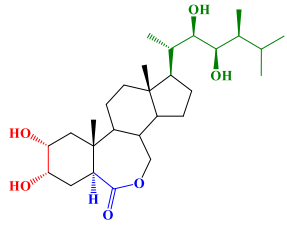 <p><b>1</b></p>    |    |    |    |
|  <p><b>12</b></p>   |    |    |    |
|  <p><b>17</b></p> |  |  |  |
|  <p><b>18</b></p> |  |  |  |
|  <p><b>19</b></p> |  |  |  |
|  <p><b>14</b></p> |  |  |  |

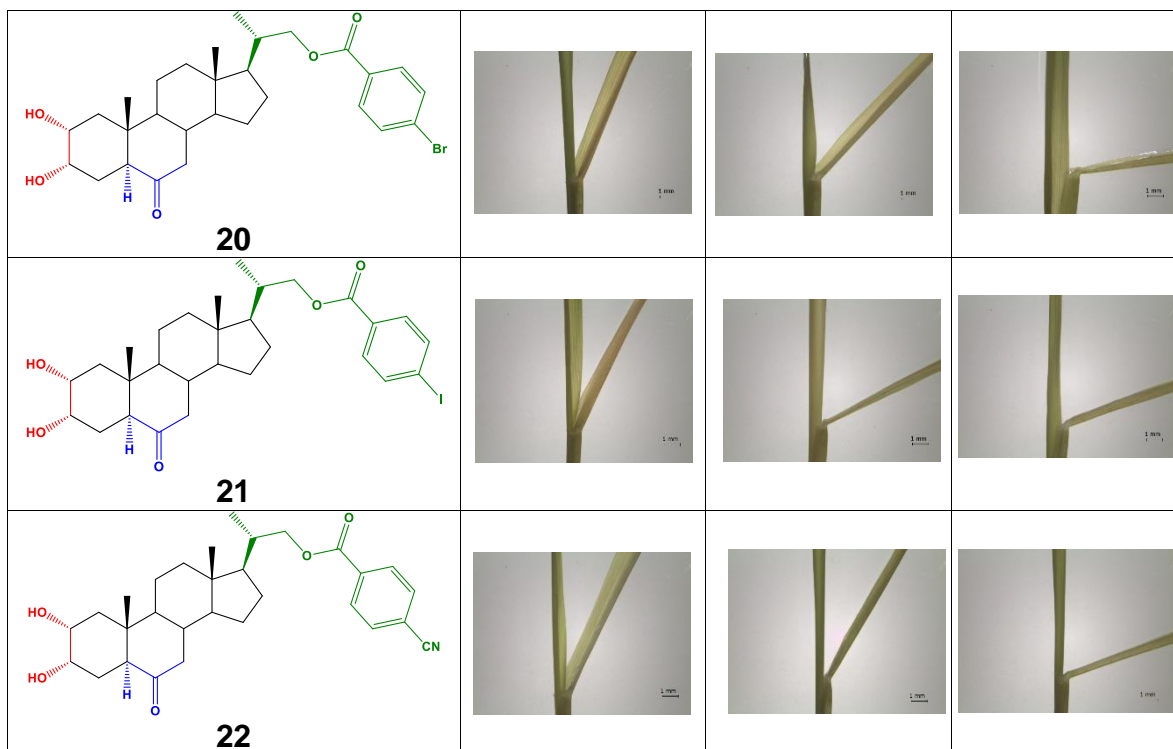

**Table S2.** Docked compounds–heterodimer protein contacts of synthetic analogs (**12–22**).

| Compound   | Protein contacts                    |                                                                          |
|------------|-------------------------------------|--------------------------------------------------------------------------|
|            | Hydrogen bonds                      | Non-polar interactions                                                   |
| <b>12</b>  | Asn705<br>His61<br>Tyr642<br>Ser647 | Ile706, Tyr599, Phe681, Met657, Trp564, Pro648,<br>Ile682, Ile592, Phe60 |
| <b>14</b>  | His61<br>Tyr642<br>Ser647           | Ile706, Tyr597, Trp564, Phe681, Ile682, Phe60,<br>Tyr597, Tyr599, Pro648 |
| <b>16a</b> | Asn705<br>His61                     | Trp564, Phe681, Ile682, Phe60, Tyr642, Phe60,<br>Tyr597                  |
| <b>17</b>  | Asn705<br>Ser647<br>Tyr642          | Tyr597, Trp564, Met657, Ile682, Phe60, Phe681,<br>Tyr642                 |
| <b>18</b>  | Ser647<br>Asn705                    | Tyr597, Trp564, Met657, Ile682, Phe60, Phe681,<br>Tyr642                 |

|           |                                                        |                                                                                  |
|-----------|--------------------------------------------------------|----------------------------------------------------------------------------------|
|           | His61                                                  |                                                                                  |
| <b>19</b> | Ser647<br>Val62<br>Tyr597<br>His61<br>Asn705<br>Tyr642 | Tyr599, Trp564, Ile682, Phe60, Phe681, Tyr642,<br>Ile706, Ile540, Ile563, Pro648 |
| <b>20</b> | Ser647<br>Val62<br>His61<br>Asn705                     | Tyr599, Trp564, Ile682, Phe60, Phe681, Tyr642,<br>Ile706, Ile540, Ile563, Pro648 |
| <b>21</b> | Ser647<br>Asn705<br>Tyr642<br>His61                    | Tyr599, Trp564, Ile682, Phe60, Phe681, Tyr642,<br>Ile706, Met657, Tyr597         |
| <b>22</b> | Ser647<br>Val62<br>His61                               | Tyr599, Trp564, Ile682, Pro648, Phe681, Ile706,<br>Phe60                         |
